# Supplementary material for: METSP: A Maximum-Entropy Classifier Based Text Mining Tool for Transporter-Substrate Identification with Semistructured Text
Source: Hindawi journal article supplement (doi:10.1155/2015/254838), 2015-01-01
Supplement: f1 [file 254838.f1.zip]

**Additional file 3 – The 3942 human TSPs were extracted by METSP.**

| <b>UniProt_AC</b> | <b>CompoundID_KEGG</b> |
|-------------------|------------------------|
| A0AV02            | C00238                 |
| A0AV02            | C00698                 |
| A0AV02            | C01373                 |
| A0PJK1            | C00293                 |
| A0PJK1            | C01330                 |
| A1A5B4            | C00076                 |
| A1A5B4            | C00698                 |
| A5D6W6            | C01356                 |
| A5PKW4            | C00215                 |
| A5PKW4            | C00242                 |
| A5X5Y0            | C01373                 |
| A6NFH5            | C01356                 |
| A6NH11            | C05005                 |
| A6NH57            | C00035                 |
| A6NH57            | C00044                 |
| A6NIM6            | C00098                 |
| A6NJY1            | C00282                 |
| A6NK97            | C00059                 |
| A6NK97            | C00468                 |
| A6NM10            | C00001                 |
| A6NNN8            | C00045                 |
| A6NNN8            | C01330                 |
| A6NP61            | C01330                 |
| A6NP61            | C01558                 |
| A8K7I4            | C00076                 |
| A8K7I4            | C00698                 |
| A8MPY1            | C00334                 |
| A8MPY1            | C00698                 |
| A8MTJ3            | C00012                 |
| A8MTJ3            | C00076                 |
| A8MTJ3            | C00215                 |
| A8MTJ3            | C00293                 |
| A8MTJ3            | C00403                 |
| A8MTJ3            | C00575                 |
| A8MTJ3            | C00942                 |
| A8MTJ3            | C01330                 |
| A8MTJ3            | C01373                 |
| A8MTJ3            | C01501                 |
| A8MTJ3            | C11477                 |
| A8MTJ3            | C15906                 |
| A8MTJ3            | C16048                 |
| A8MYU2            | C00076                 |
| A8MYU2            | C00238                 |
| B2C4J0            | C00174                 |
| B2C4J0            | C00326                 |
| B7U540            | C00238                 |

|        |        |
|--------|--------|
| O00141 | C00238 |
| O00141 | C00698 |
| O00141 | C01330 |
| O00159 | C00293 |
| O00159 | C00723 |
| O00168 | C00698 |
| O00180 | C00238 |
| O00217 | C00004 |
| O00217 | C00399 |
| O00217 | C05359 |
| O00244 | C00050 |
| O00244 | C00070 |
| O00291 | C11033 |
| O00291 | C12269 |
| O00299 | C00698 |
| O00305 | C00076 |
| O00337 | C00212 |
| O00337 | C00396 |
| O00337 | C00697 |
| O00337 | C00801 |
| O00337 | C01330 |
| O00337 | C03169 |
| O00337 | C07207 |
| O00337 | C07210 |
| O00341 | C00025 |
| O00341 | C00045 |
| O00341 | C00302 |
| O00341 | C00376 |
| O00341 | C00698 |
| O00341 | C01330 |
| O00341 | C02028 |
| O00391 | C00145 |
| O00400 | C00024 |
| O00468 | C01330 |
| O00476 | C00009 |
| O00476 | C00293 |
| O00476 | C00366 |
| O00476 | C01330 |
| O00483 | C00004 |
| O00483 | C00399 |
| O00483 | C05359 |
| O00522 | C00007 |
| O00555 | C00076 |
| O00555 | C00403 |
| O00562 | C01194 |
| O00591 | C00334 |
| O00591 | C00698 |
| O00624 | C00009 |

|        |        |
|--------|--------|
| O00624 | C01330 |
| O00631 | C00076 |
| O12163 | C01356 |
| O12163 | C01373 |
| O14520 | C00001 |
| O14520 | C00116 |
| O14559 | C00293 |
| O14559 | C00723 |
| O14561 | C00004 |
| O14561 | C00399 |
| O14561 | C05359 |
| O14618 | C00070 |
| O14649 | C00174 |
| O14649 | C00238 |
| O14735 | C00055 |
| O14735 | C01194 |
| O14745 | C00051 |
| O14745 | C00282 |
| O14745 | C00698 |
| O14745 | C01330 |
| O14764 | C00334 |
| O14764 | C00698 |
| O14791 | C00698 |
| O14791 | C01356 |
| O14827 | C00035 |
| O14827 | C00044 |
| O14827 | C00076 |
| O14827 | C00215 |
| O14827 | C00242 |
| O14842 | C00076 |
| O14842 | C00293 |
| O14842 | C00723 |
| O14863 | C00038 |
| O14910 | C00334 |
| O14925 | C00012 |
| O14958 | C00076 |
| O14975 | C00162 |
| O14980 | C16439 |
| O14981 | C14439 |
| O14983 | C00076 |
| O14983 | C00305 |
| O15068 | C00215 |
| O15068 | C00242 |
| O15078 | C00376 |
| O15118 | C00187 |
| O15118 | C00370 |
| O15130 | C16112 |
| O15162 | C00076 |

|        |        |
|--------|--------|
| O15162 | C00865 |
| O15211 | C00215 |
| O15211 | C00242 |
| O15239 | C00004 |
| O15239 | C00399 |
| O15239 | C05359 |
| O15243 | C18181 |
| O15244 | C00114 |
| O15244 | C00179 |
| O15244 | C00547 |
| O15244 | C00780 |
| O15244 | C00791 |
| O15244 | C01373 |
| O15244 | C03758 |
| O15244 | C06818 |
| O15244 | C06821 |
| O15244 | C06911 |
| O15244 | C06952 |
| O15244 | C06994 |
| O15244 | C07151 |
| O15244 | C07233 |
| O15244 | C07512 |
| O15244 | C11273 |
| O15244 | C11310 |
| O15244 | C13258 |
| O15244 | C13736 |
| O15245 | C00114 |
| O15245 | C00315 |
| O15245 | C00455 |
| O15245 | C00750 |
| O15245 | C01373 |
| O15245 | C01416 |
| O15245 | C01479 |
| O15245 | C06526 |
| O15245 | C06952 |
| O15245 | C07073 |
| O15245 | C07368 |
| O15245 | C07401 |
| O15245 | C12269 |
| O15245 | C13815 |
| O15247 | C00698 |
| O15315 | C00039 |
| O15315 | C00271 |
| O15374 | C00022 |
| O15374 | C00033 |
| O15374 | C00060 |
| O15374 | C00164 |
| O15374 | C00174 |

|        |        |
|--------|--------|
| O15374 | C01432 |
| O15374 | C01450 |
| O15374 | C16434 |
| O15374 | C16436 |
| O15374 | C16439 |
| O15375 | C00022 |
| O15375 | C00033 |
| O15375 | C00060 |
| O15375 | C00164 |
| O15375 | C01432 |
| O15375 | C01450 |
| O15375 | C16434 |
| O15375 | C16436 |
| O15375 | C16439 |
| O15399 | C00076 |
| O15399 | C00302 |
| O15399 | C00305 |
| O15399 | C12269 |
| O15403 | C00022 |
| O15403 | C00033 |
| O15403 | C00060 |
| O15403 | C00164 |
| O15403 | C00174 |
| O15403 | C01432 |
| O15403 | C01450 |
| O15403 | C16434 |
| O15403 | C16436 |
| O15403 | C16439 |
| O15427 | C00022 |
| O15427 | C00033 |
| O15427 | C00060 |
| O15427 | C00164 |
| O15427 | C01432 |
| O15427 | C01450 |
| O15427 | C16434 |
| O15427 | C16436 |
| O15427 | C16439 |
| O15431 | C00070 |
| O15432 | C00070 |
| O15438 | C01558 |
| O15439 | C00698 |
| O15440 | C00215 |
| O15457 | C00039 |
| O15496 | C00187 |
| O15496 | C06254 |
| O15504 | C00293 |
| O15528 | C00076 |
| O15547 | C01373 |

|        |        |
|--------|--------|
| O15554 | C00076 |
| O15554 | C00238 |
| O15554 | C06922 |
| O43181 | C00004 |
| O43181 | C00399 |
| O43181 | C05359 |
| O43196 | C00039 |
| O43246 | C00045 |
| O43246 | C01602 |
| O43246 | C16440 |
| O43306 | C00001 |
| O43315 | C00001 |
| O43315 | C00060 |
| O43315 | C00116 |
| O43315 | C00396 |
| O43315 | C00706 |
| O43315 | C15587 |
| O43448 | C00238 |
| O43462 | C00370 |
| O43502 | C00039 |
| O43502 | C00271 |
| O43511 | C00059 |
| O43511 | C00698 |
| O43511 | C00708 |
| O43511 | C01330 |
| O43520 | C00865 |
| O43520 | C01558 |
| O43525 | C00238 |
| O43526 | C00238 |
| O43526 | C07485 |
| O43526 | C14206 |
| O43542 | C00039 |
| O43543 | C00039 |
| O43592 | C00066 |
| O43615 | C00012 |
| O43615 | C13028 |
| O43633 | C11106 |
| O43674 | C00004 |
| O43674 | C00399 |
| O43674 | C05359 |
| O43676 | C00004 |
| O43676 | C00399 |
| O43676 | C05359 |
| O43677 | C00004 |
| O43677 | C00399 |
| O43677 | C05359 |
| O43678 | C00004 |
| O43678 | C00399 |

|        |        |
|--------|--------|
| O43678 | C05359 |
| O43681 | C06697 |
| O43687 | C00076 |
| O43687 | C00575 |
| O43707 | C00282 |
| O43707 | C01330 |
| O43739 | C00242 |
| O43761 | C03758 |
| O43768 | C00723 |
| O43772 | C00162 |
| O43772 | C00487 |
| O43808 | C00147 |
| O43808 | C00215 |
| O43819 | C00070 |
| O43819 | C00524 |
| O43826 | C00293 |
| O43861 | C00865 |
| O43861 | C01373 |
| O43868 | C00237 |
| O43868 | C00299 |
| O43868 | C00801 |
| O43868 | C01330 |
| O43868 | C15586 |
| O43868 | C15587 |
| O43889 | C00076 |
| O43920 | C00004 |
| O43920 | C00399 |
| O43920 | C05359 |
| O60229 | C00035 |
| O60229 | C00044 |
| O60266 | C00001 |
| O60285 | C00293 |
| O60312 | C00865 |
| O60343 | C00293 |
| O60343 | C00723 |
| O60344 | C00012 |
| O60359 | C00076 |
| O60359 | C00302 |
| O60359 | C11033 |
| O60391 | C00076 |
| O60391 | C00302 |
| O60391 | C00305 |
| O60391 | C12269 |
| O60423 | C00865 |
| O60493 | C01330 |
| O60494 | C00023 |
| O60494 | C01708 |
| O60494 | C01834 |

|        |        |
|--------|--------|
| O60503 | C00001 |
| O60656 | C15584 |
| O60664 | C00159 |
| O60669 | C00022 |
| O60669 | C00033 |
| O60669 | C00060 |
| O60669 | C00164 |
| O60669 | C01432 |
| O60669 | C01450 |
| O60669 | C16434 |
| O60669 | C16436 |
| O60669 | C16439 |
| O60706 | C00238 |
| O60721 | C00076 |
| O60721 | C00205 |
| O60721 | C00238 |
| O60721 | C00376 |
| O60721 | C01330 |
| O60733 | C00219 |
| O60733 | C00533 |
| O60733 | C00840 |
| O60733 | C00865 |
| O60741 | C00215 |
| O60741 | C00238 |
| O60741 | C01330 |
| O60779 | C00378 |
| O60779 | C00504 |
| O60830 | C00012 |
| O60831 | C00025 |
| O60840 | C00076 |
| O60894 | C00012 |
| O60894 | C06865 |
| O60895 | C00012 |
| O60895 | C06865 |
| O60896 | C00012 |
| O60896 | C06865 |
| O60928 | C00238 |
| O60931 | C00491 |
| O60931 | C01420 |
| O60939 | C01330 |
| O60939 | C13603 |
| O70891 | C01356 |
| O70891 | C01373 |
| O70901 | C01356 |
| O70901 | C01373 |
| O75027 | C00032 |
| O75110 | C00865 |
| O75145 | C00082 |



|        |        |
|--------|--------|
| O75185 | C00076 |
| O75185 | C00305 |
| O75190 | C00237 |
| O75251 | C00004 |
| O75251 | C00399 |
| O75251 | C05359 |
| O75306 | C00004 |
| O75306 | C00399 |
| O75306 | C05359 |
| O75311 | C00037 |
| O75311 | C00698 |
| O75334 | C00082 |
| O75351 | C00187 |
| O75351 | C00238 |
| O75367 | C00301 |
| O75367 | C08353 |
| O75380 | C00004 |
| O75380 | C00399 |
| O75380 | C05359 |
| O75387 | C00045 |
| O75387 | C01330 |
| O75387 | C02057 |
| O75417 | C00271 |
| O75438 | C00004 |
| O75438 | C00399 |
| O75438 | C05359 |
| O75469 | C06708 |
| O75489 | C00004 |
| O75489 | C00399 |
| O75489 | C05359 |
| O75604 | C00496 |
| O75643 | C00046 |
| O75694 | C00293 |
| O75746 | C00025 |
| O75746 | C00049 |
| O75746 | C00076 |
| O75746 | C00302 |
| O75746 | C16433 |
| O75751 | C01373 |
| O75762 | C01373 |
| O75771 | C00039 |
| O75787 | C00080 |
| O75880 | C00070 |
| O75899 | C00076 |
| O75899 | C00137 |
| O75899 | C00238 |
| O75899 | C00334 |
| O75908 | C00187 |

|        |        |
|--------|--------|
| O75915 | C00025 |
| O75915 | C00245 |
| O75915 | C00302 |
| O75947 | C00282 |
| O75947 | C05359 |
| O75952 | C00076 |
| O75962 | C00035 |
| O75962 | C00044 |
| O75964 | C00282 |
| O75964 | C05359 |
| O76024 | C00076 |
| O76054 | C02477 |
| O76061 | C00009 |
| O76061 | C00076 |
| O76082 | C00487 |
| O76082 | C01330 |
| O76082 | C01373 |
| O76082 | C07512 |
| O76090 | C00076 |
| O76090 | C00698 |
| O91085 | C01356 |
| O91085 | C01373 |
| O94759 | C00076 |
| O94759 | C01330 |
| O94759 | C01373 |
| O94761 | C00039 |
| O94762 | C00039 |
| O94778 | C00001 |
| O94778 | C01319 |
| O94823 | C00865 |
| O94827 | C00215 |
| O94827 | C00242 |
| O94875 | C00001 |
| O94875 | C01330 |
| O94956 | C00403 |
| O94956 | C00584 |
| O94956 | C00696 |
| O94956 | C01330 |
| O94956 | C02166 |
| O94956 | C04741 |
| O94956 | C05122 |
| O94956 | C05963 |
| O95045 | C00214 |
| O95045 | C00299 |
| O95045 | C00526 |
| O95045 | C03169 |
| O95045 | C16633 |
| O95069 | C00238 |

|        |        |
|--------|--------|
| O95073 | C00039 |
| O95139 | C00004 |
| O95139 | C00399 |
| O95139 | C05359 |
| O95149 | C00046 |
| O95166 | C00334 |
| O95167 | C00004 |
| O95167 | C00399 |
| O95167 | C05359 |
| O95168 | C00004 |
| O95168 | C00399 |
| O95168 | C05359 |
| O95169 | C00004 |
| O95169 | C00399 |
| O95169 | C05359 |
| O95178 | C00004 |
| O95178 | C00399 |
| O95178 | C05359 |
| O95180 | C00076 |
| O95180 | C00291 |
| O95180 | C07222 |
| O95182 | C00004 |
| O95182 | C00399 |
| O95182 | C05359 |
| O95214 | C18181 |
| O95236 | C01356 |
| O95255 | C00051 |
| O95255 | C02441 |
| O95259 | C00238 |
| O95259 | C13240 |
| O95264 | C00780 |
| O95264 | C01373 |
| O95267 | C00035 |
| O95267 | C00044 |
| O95267 | C00076 |
| O95267 | C00165 |
| O95267 | C00215 |
| O95267 | C00242 |
| O95279 | C00174 |
| O95279 | C00238 |
| O95298 | C00004 |
| O95298 | C00399 |
| O95298 | C05359 |
| O95299 | C00004 |
| O95299 | C00399 |
| O95299 | C05359 |
| O95342 | C01330 |
| O95342 | C01558 |

|        |        |
|--------|--------|
| O95396 | C00087 |
| O95397 | C05005 |
| O95398 | C00215 |
| O95398 | C00242 |
| O95398 | C00575 |
| O95436 | C00009 |
| O95436 | C01330 |
| O95445 | C00187 |
| O95445 | C01356 |
| O95477 | C00187 |
| O95477 | C00575 |
| O95477 | C00865 |
| O95528 | C00031 |
| O95528 | C00282 |
| O95528 | C00293 |
| O95528 | C11477 |
| O95622 | C00001 |
| O95750 | C00293 |
| O95833 | C00698 |
| O95907 | C00022 |
| O95907 | C00033 |
| O95907 | C00060 |
| O95907 | C00164 |
| O95907 | C01432 |
| O95907 | C01450 |
| O95907 | C16434 |
| O95907 | C16436 |
| O95907 | C16439 |
| O95954 | C00504 |
| O95970 | C00238 |
| O96000 | C00004 |
| O96000 | C00399 |
| O96000 | C05359 |
| P00395 | C00007 |
| P00395 | C00524 |
| P00395 | C05359 |
| P00403 | C00007 |
| P00403 | C00524 |
| P00403 | C05359 |
| P00414 | C00007 |
| P00414 | C00524 |
| P00414 | C05359 |
| P00450 | C00023 |
| P00450 | C00070 |
| P00505 | C00162 |
| P00734 | C00076 |
| P00740 | C01065 |
| P00750 | C00471 |

|        |        |
|--------|--------|
| P00797 | C00873 |
| P00797 | C01330 |
| P00797 | C02246 |
| P00813 | C00212 |
| P00813 | C15587 |
| P01130 | C00187 |
| P01130 | C01834 |
| P01133 | C00076 |
| P01133 | C00305 |
| P01185 | C00001 |
| P01185 | C01330 |
| P01241 | C00293 |
| P01258 | C00009 |
| P01258 | C00076 |
| P01258 | C06865 |
| P01270 | C00293 |
| P01275 | C00293 |
| P01275 | C00723 |
| P01303 | C00076 |
| P01308 | C00045 |
| P01308 | C00293 |
| P01584 | C00293 |
| P01588 | C01330 |
| P01588 | C18200 |
| P01903 | C00012 |
| P01906 | C00012 |
| P01911 | C00012 |
| P01912 | C00012 |
| P02008 | C00007 |
| P02042 | C00007 |
| P02100 | C00007 |
| P02144 | C00007 |
| P02647 | C00157 |
| P02647 | C00187 |
| P02647 | C00865 |
| P02649 | C00187 |
| P02649 | C00865 |
| P02652 | C00187 |
| P02652 | C00865 |
| P02654 | C00187 |
| P02654 | C00865 |
| P02655 | C00187 |
| P02655 | C00865 |
| P02656 | C00187 |
| P02656 | C00865 |
| P02689 | C01356 |
| P02708 | C01373 |
| P02708 | C01996 |

|        |        |
|--------|--------|
| P02730 | C00288 |
| P02730 | C00698 |
| P02730 | C01708 |
| P02749 | C00422 |
| P02768 | C00001 |
| P02768 | C00038 |
| P02768 | C00076 |
| P02768 | C00238 |
| P02768 | C00486 |
| P02768 | C01330 |
| P02768 | C01558 |
| P02775 | C00293 |
| P02787 | C00023 |
| P02787 | C00032 |
| P02787 | C00288 |
| P02787 | C14819 |
| P02788 | C00023 |
| P02788 | C00288 |
| P02788 | C14819 |
| P02790 | C00023 |
| P02790 | C00032 |
| P02792 | C00023 |
| P02794 | C00023 |
| P03170 | C00012 |
| P03180 | C00012 |
| P03886 | C00004 |
| P03886 | C00399 |
| P03886 | C05359 |
| P03891 | C00004 |
| P03891 | C00399 |
| P03891 | C05359 |
| P03897 | C00004 |
| P03897 | C00399 |
| P03897 | C05359 |
| P03901 | C00004 |
| P03901 | C00399 |
| P03901 | C05359 |
| P03905 | C00004 |
| P03905 | C00399 |
| P03905 | C05359 |
| P03915 | C00004 |
| P03915 | C00399 |
| P03915 | C05359 |
| P03923 | C00004 |
| P03923 | C00399 |
| P03923 | C05359 |
| P03928 | C00282 |
| P03928 | C05359 |

|        |        |
|--------|--------|
| P04054 | C00076 |
| P04054 | C00293 |
| P04083 | C00076 |
| P04114 | C00187 |
| P04156 | C00023 |
| P04180 | C00187 |
| P04196 | C00032 |
| P04196 | C00326 |
| P04196 | C00374 |
| P04196 | C00520 |
| P04196 | C00925 |
| P04196 | C02148 |
| P04229 | C00012 |
| P04271 | C00076 |
| P04271 | C00238 |
| P04278 | C00377 |
| P04798 | C00005 |
| P04798 | C05359 |
| P04839 | C00080 |
| P04899 | C00076 |
| P04920 | C00288 |
| P05019 | C00039 |
| P05019 | C00182 |
| P05019 | C00293 |
| P05019 | C00723 |
| P05023 | C00238 |
| P05023 | C01330 |
| P05026 | C00238 |
| P05026 | C01330 |
| P05090 | C01356 |
| P05106 | C01356 |
| P05141 | C00147 |
| P05141 | C00215 |
| P05177 | C00005 |
| P05177 | C05359 |
| P05305 | C00533 |
| P05496 | C00282 |
| P05496 | C05359 |
| P05538 | C00012 |
| P05543 | C08215 |
| P05771 | C00007 |
| P05771 | C01834 |
| P05814 | C00076 |
| P05814 | C00367 |
| P05919 | C01356 |
| P05919 | C01373 |
| P05921 | C01356 |
| P05921 | C01373 |

|        |        |
|--------|--------|
| P05923 | C01356 |
| P05923 | C01373 |
| P05924 | C01356 |
| P05924 | C01373 |
| P05925 | C01356 |
| P05925 | C01373 |
| P05937 | C00076 |
| P05937 | C04212 |
| P05947 | C01356 |
| P05947 | C01373 |
| P05948 | C01356 |
| P05948 | C01373 |
| P05949 | C01356 |
| P05949 | C01373 |
| P05953 | C00524 |
| P06213 | C00293 |
| P06213 | C00723 |
| P06241 | C00076 |
| P06307 | C00012 |
| P06307 | C00174 |
| P06340 | C00012 |
| P06576 | C00282 |
| P06576 | C05359 |
| P06727 | C00187 |
| P06727 | C00865 |
| P06756 | C01356 |
| P06881 | C00076 |
| P06927 | C01356 |
| P06927 | C02690 |
| P06927 | C04911 |
| P07108 | C00040 |
| P07108 | C02843 |
| P07148 | C01356 |
| P07355 | C00076 |
| P07510 | C01996 |
| P07602 | C01356 |
| P07738 | C00007 |
| P07738 | C01708 |
| P07738 | C03339 |
| P07919 | C00390 |
| P07919 | C00524 |
| P07919 | C05359 |
| P07996 | C00638 |
| P08069 | C00723 |
| P08133 | C00076 |
| P08172 | C00020 |
| P08172 | C00238 |
| P08172 | C01996 |



|        |        |
|--------|--------|
| P08173 | C00020 |
| P08173 | C00238 |
| P08173 | C01996 |
| P08183 | C06708 |
| P08195 | C00045 |
| P08195 | C00050 |
| P08195 | C00062 |
| P08195 | C00076 |
| P08195 | C00078 |
| P08195 | C00082 |
| P08195 | C00097 |
| P08195 | C00123 |
| P08195 | C00303 |
| P08195 | C00355 |
| P08195 | C01330 |
| P08195 | C02057 |
| P08195 | C02465 |
| P08195 | C08215 |
| P08195 | C16439 |
| P08195 | C18672 |
| P08235 | C00001 |
| P08235 | C00238 |
| P08519 | C01356 |
| P08582 | C00023 |
| P08684 | C00005 |
| P08684 | C05359 |
| P08754 | C00044 |
| P08754 | C00238 |
| P08803 | C01356 |
| P08803 | C01373 |
| P08804 | C01356 |
| P08804 | C01373 |
| P08805 | C01356 |
| P08805 | C01373 |
| P08806 | C01356 |
| P08806 | C01373 |
| P08807 | C01356 |
| P08807 | C01373 |
| P08808 | C01356 |
| P08808 | C01373 |
| P08912 | C00020 |
| P08912 | C00238 |
| P08912 | C01996 |
| P08913 | C00076 |
| P08913 | C00238 |
| P09105 | C00007 |
| P09131 | C01330 |
| P09131 | C01558 |

|        |        |
|--------|--------|
| P09298 | C00326 |
| P09327 | C00681 |
| P09327 | C04637 |
| P09455 | C00473 |
| P09486 | C00076 |
| P0C0P6 | C00076 |
| P0C6Z6 | C00012 |
| P0C737 | C00012 |
| P0C738 | C00012 |
| P0C739 | C00012 |
| P0C7X4 | C00023 |
| P0C851 | C04637 |
| P0CAP9 | C00012 |
| P10082 | C00012 |
| P10632 | C00005 |
| P10632 | C05359 |
| P10644 | C00001 |
| P10909 | C00187 |
| P10909 | C00524 |
| P11166 | C00031 |
| P11166 | C00293 |
| P11166 | C05422 |
| P11168 | C00031 |
| P11168 | C00293 |
| P11168 | C01330 |
| P11169 | C00031 |
| P11169 | C00293 |
| P11169 | C05422 |
| P11215 | C13603 |
| P11229 | C00020 |
| P11229 | C00238 |
| P11229 | C01996 |
| P11230 | C01996 |
| P11388 | C00039 |
| P11473 | C00076 |
| P11597 | C00187 |
| P11597 | C00865 |
| P11712 | C00005 |
| P11712 | C05359 |
| P11717 | C00009 |
| P11717 | C00159 |
| P12107 | C00211 |
| P12235 | C00147 |
| P12235 | C00215 |
| P12236 | C00147 |
| P12236 | C00215 |
| P12270 | C00293 |
| P12515 | C01356 |

|        |        |
|--------|--------|
| P12515 | C01373 |
| P12516 | C01356 |
| P12516 | C01373 |
| P12517 | C01356 |
| P12517 | C01373 |
| P12518 | C01356 |
| P12518 | C01373 |
| P12955 | C00211 |
| P13569 | C00288 |
| P13569 | C00575 |
| P13569 | C00698 |
| P13584 | C00005 |
| P13584 | C05359 |
| P13637 | C00238 |
| P13637 | C01330 |
| P13686 | C00174 |
| P13686 | C00898 |
| P13727 | C00388 |
| P13760 | C00012 |
| P13761 | C00012 |
| P13762 | C00012 |
| P13765 | C00012 |
| P13861 | C00001 |
| P13866 | C00293 |
| P13866 | C01330 |
| P13942 | C00211 |
| P14207 | C00504 |
| P14334 | C00012 |
| P14345 | C00012 |
| P14415 | C00238 |
| P14415 | C01330 |
| P14415 | C13603 |
| P14416 | C00076 |
| P14416 | C00238 |
| P14416 | C01330 |
| P14416 | C03758 |
| P14618 | C00293 |
| P14672 | C00031 |
| P14672 | C00293 |
| P14672 | C00723 |
| P14867 | C00334 |
| P14867 | C00698 |
| P14920 | C00740 |
| P14927 | C00390 |
| P14927 | C00524 |
| P14927 | C05359 |
| P15090 | C01356 |
| P15328 | C00504 |

|        |        |
|--------|--------|
| P15382 | C00238 |
| P16112 | C00866 |
| P16152 | C00051 |
| P16260 | C00010 |
| P16389 | C00238 |
| P16444 | C05951 |
| P16444 | C05952 |
| P16499 | C00076 |
| P16615 | C00076 |
| P16615 | C00305 |
| P16671 | C00162 |
| P16671 | C00187 |
| P16671 | C00638 |
| P16671 | C01834 |
| P17081 | C00293 |
| P17516 | C00069 |
| P17516 | C01558 |
| P17516 | C01792 |
| P17568 | C00004 |
| P17568 | C00399 |
| P17568 | C05359 |
| P17612 | C00001 |
| P17658 | C00238 |
| P17787 | C00076 |
| P17787 | C01373 |
| P17787 | C01996 |
| P17844 | C00046 |
| P18428 | C00338 |
| P18428 | C01356 |
| P18505 | C00334 |
| P18505 | C00698 |
| P18507 | C00334 |
| P18507 | C00698 |
| P18806 | C01356 |
| P18806 | C01373 |
| P18859 | C00282 |
| P18859 | C05359 |
| P19224 | C15584 |
| P19367 | C00293 |
| P19404 | C00004 |
| P19404 | C00399 |
| P19404 | C05359 |
| P19440 | C00051 |
| P19440 | C00736 |
| P19544 | C00039 |
| P19544 | C00046 |
| P19554 | C01356 |
| P19554 | C01373 |

|        |        |
|--------|--------|
| P19634 | C00080 |
| P19634 | C00282 |
| P19634 | C01330 |
| P19634 | C06821 |
| P19793 | C00777 |
| P20020 | C00076 |
| P20020 | C00305 |
| P20036 | C00012 |
| P20039 | C00012 |
| P20061 | C00175 |
| P20062 | C00175 |
| P20062 | C05776 |
| P20309 | C00020 |
| P20309 | C00238 |
| P20309 | C01996 |
| P20382 | C16030 |
| P20585 | C00039 |
| P20591 | C00076 |
| P20645 | C00009 |
| P20645 | C00159 |
| P20648 | C00080 |
| P20648 | C00238 |
| P20648 | C00282 |
| P20813 | C00005 |
| P20813 | C05359 |
| P20815 | C00005 |
| P20815 | C05359 |
| P20823 | C00293 |
| P20853 | C00005 |
| P20853 | C05359 |
| P20882 | C01356 |
| P20882 | C01373 |
| P21399 | C00023 |
| P21439 | C00157 |
| P21439 | C06708 |
| P21554 | C00076 |
| P21673 | C06702 |
| P21728 | C00238 |
| P21754 | C00034 |
| P21754 | C00076 |
| P21757 | C00187 |
| P21817 | C00076 |
| P21817 | C08705 |
| P21917 | C00076 |
| P21917 | C00238 |
| P21917 | C00282 |
| P21917 | C01330 |
| P22001 | C00238 |

|        |        |
|--------|--------|
| P22059 | C00187 |
| P22059 | C01356 |
| P22307 | C01356 |
| P22413 | C00013 |
| P22413 | C00215 |
| P22413 | C00293 |
| P22459 | C00238 |
| P22460 | C00238 |
| P22466 | C00723 |
| P22466 | C18181 |
| P22612 | C00001 |
| P22626 | C00046 |
| P22680 | C00187 |
| P22694 | C00001 |
| P22732 | C00293 |
| P22732 | C01496 |
| P22748 | C00288 |
| P22748 | C01330 |
| P23297 | C00076 |
| P23297 | C00238 |
| P23327 | C00076 |
| P23415 | C00037 |
| P23415 | C00698 |
| P23416 | C00037 |
| P23416 | C00698 |
| P23588 | C00046 |
| P23634 | C00076 |
| P23634 | C00305 |
| P23975 | C00547 |
| P23975 | C00706 |
| P23975 | C01330 |
| P24046 | C00334 |
| P24046 | C00698 |
| P24462 | C00005 |
| P24462 | C05359 |
| P24539 | C05359 |
| P24723 | C00076 |
| P24723 | C00716 |
| P24723 | C00865 |
| P25100 | C00076 |
| P25101 | C00293 |
| P25705 | C05359 |
| P25963 | C00187 |
| P26678 | C00076 |
| P27169 | C00187 |
| P27352 | C00175 |
| P27986 | C00293 |
| P28288 | C00215 |

|        |        |
|--------|--------|
| P28288 | C00638 |
| P28289 | C00839 |
| P28331 | C00004 |
| P28331 | C00399 |
| P28331 | C05359 |
| P28472 | C00334 |
| P28472 | C00698 |
| P28476 | C00334 |
| P28476 | C00698 |
| P29373 | C00777 |
| P29475 | C00076 |
| P29972 | C00001 |
| P29972 | C00011 |
| P29972 | C00014 |
| P29972 | C00116 |
| P29972 | C00238 |
| P29972 | C00533 |
| P29972 | C00942 |
| P29972 | C01373 |
| P29973 | C00215 |
| P29973 | C00942 |
| P29973 | C01373 |
| P30044 | C00027 |
| P30044 | C00342 |
| P30049 | C05359 |
| P30301 | C00001 |
| P30518 | C00001 |
| P30531 | C00334 |
| P30531 | C00698 |
| P30531 | C01330 |
| P30532 | C01373 |
| P30532 | C01996 |
| P30536 | C00032 |
| P30536 | C00187 |
| P30626 | C00076 |
| P30825 | C00045 |
| P30825 | C01602 |
| P30825 | C16440 |
| P30872 | C16022 |
| P30874 | C00076 |
| P30926 | C01373 |
| P30926 | C01996 |
| P30968 | C18183 |
| P30989 | C01836 |
| P31321 | C00001 |
| P31323 | C00001 |
| P31327 | C00014 |
| P31327 | C00086 |

|        |        |
|--------|--------|
| P31415 | C00076 |
| P31639 | C00293 |
| P31639 | C01330 |
| P31641 | C00045 |
| P31641 | C00099 |
| P31641 | C00245 |
| P31641 | C00698 |
| P31641 | C01330 |
| P31644 | C00334 |
| P31644 | C00698 |
| P31645 | C00780 |
| P31645 | C01330 |
| P31749 | C00293 |
| P31749 | C00638 |
| P31749 | C00723 |
| P31751 | C00293 |
| P31751 | C00638 |
| P32119 | C00342 |
| P32121 | C00723 |
| P32189 | C00116 |
| P32297 | C01373 |
| P32297 | C01996 |
| P32322 | C00003 |
| P32322 | C00006 |
| P32418 | C00076 |
| P32418 | C01330 |
| P33056 | C00039 |
| P33260 | C00005 |
| P33260 | C05359 |
| P33527 | C00051 |
| P33527 | C00951 |
| P33527 | C01937 |
| P33527 | C02166 |
| P33527 | C03033 |
| P33806 | C00039 |
| P33827 | C00046 |
| P33849 | C00039 |
| P33897 | C00215 |
| P34903 | C00334 |
| P34903 | C00698 |
| P35222 | C00076 |
| P35367 | C00388 |
| P35367 | C02012 |
| P35408 | C01780 |
| P35498 | C01330 |
| P35499 | C01330 |
| P35520 | C00283 |
| P35520 | C00716 |



|        |        |
|--------|--------|
| P35520 | C00736 |
| P35523 | C00698 |
| P35557 | C00293 |
| P35557 | C00723 |
| P35568 | C00293 |
| P35575 | C00293 |
| P35610 | C00187 |
| P35613 | C00060 |
| P35613 | C00376 |
| P35613 | C01432 |
| P35658 | C00293 |
| P35670 | C00070 |
| P35790 | C01356 |
| P35913 | C00076 |
| P35966 | C01356 |
| P35966 | C01373 |
| P36021 | C00060 |
| P36021 | C00174 |
| P36021 | C02465 |
| P36021 | C07639 |
| P36021 | C08215 |
| P36404 | C00076 |
| P36404 | C01996 |
| P36542 | C05359 |
| P36544 | C00076 |
| P36544 | C00698 |
| P36544 | C01373 |
| P36544 | C01996 |
| P37088 | C01330 |
| P37088 | C06821 |
| P37198 | C00293 |
| P37231 | C00638 |
| P37231 | C01834 |
| P37840 | C00547 |
| P37840 | C00780 |
| P37840 | C03758 |
| P38571 | C00287 |
| P38571 | C00356 |
| P38571 | C01834 |
| P38919 | C00046 |
| P39086 | C00302 |
| P39086 | C01373 |
| P39905 | C03758 |
| P40126 | C17936 |
| P40126 | C17937 |
| P40145 | C00001 |
| P40222 | C00076 |
| P40261 | C06708 |

|        |        |
|--------|--------|
| P40879 | C00059 |
| P40879 | C00288 |
| P40879 | C00698 |
| P41143 | C00076 |
| P41143 | C00238 |
| P41145 | C00076 |
| P41145 | C00238 |
| P41180 | C00076 |
| P41181 | C00001 |
| P41181 | C00116 |
| P41181 | C00840 |
| P41222 | C00376 |
| P41222 | C00486 |
| P41222 | C00500 |
| P41222 | C00777 |
| P41222 | C08215 |
| P41231 | C00075 |
| P41231 | C13742 |
| P41439 | C00504 |
| P41440 | C00080 |
| P41440 | C00504 |
| P41440 | C01937 |
| P41595 | C00076 |
| P41743 | C00293 |
| P42261 | C00302 |
| P42261 | C01373 |
| P42262 | C00302 |
| P42262 | C01373 |
| P42263 | C00302 |
| P42263 | C01373 |
| P42658 | C00238 |
| P43003 | C00025 |
| P43003 | C00045 |
| P43003 | C00302 |
| P43003 | C00402 |
| P43003 | C01330 |
| P43003 | C02028 |
| P43003 | C16433 |
| P43004 | C00025 |
| P43004 | C00045 |
| P43004 | C00302 |
| P43004 | C00402 |
| P43004 | C01330 |
| P43004 | C02028 |
| P43004 | C16433 |
| P43005 | C00025 |
| P43005 | C00045 |
| P43005 | C00302 |

|        |        |
|--------|--------|
| P43005 | C00402 |
| P43005 | C01330 |
| P43005 | C02028 |
| P43005 | C16433 |
| P43007 | C00041 |
| P43007 | C00045 |
| P43007 | C00065 |
| P43007 | C00148 |
| P43007 | C00188 |
| P43007 | C00491 |
| P43007 | C00698 |
| P43007 | C00716 |
| P43007 | C00736 |
| P43007 | C01015 |
| P43007 | C01330 |
| P43007 | C01401 |
| P43007 | C02028 |
| P43155 | C00024 |
| P43246 | C00039 |
| P43487 | C00044 |
| P43652 | C01834 |
| P43652 | C02477 |
| P43681 | C00076 |
| P43681 | C01373 |
| P43681 | C01996 |
| P45844 | C00187 |
| P45844 | C00326 |
| P45844 | C00370 |
| P45844 | C00865 |
| P45844 | C01356 |
| P46059 | C00012 |
| P46059 | C00080 |
| P46059 | C00098 |
| P46059 | C00282 |
| P46063 | C00039 |
| P46063 | C00305 |
| P46063 | C00434 |
| P46098 | C00780 |
| P46098 | C01373 |
| P46721 | C00403 |
| P46721 | C01330 |
| P46721 | C01558 |
| P46721 | C11363 |
| P46934 | C01330 |
| P47224 | C00215 |
| P47224 | C00242 |
| P47710 | C00009 |
| P47710 | C00076 |

|        |        |
|--------|--------|
| P47869 | C00334 |
| P47869 | C00698 |
| P47870 | C00334 |
| P47870 | C00698 |
| P47871 | C00293 |
| P47871 | C00723 |
| P47871 | C01501 |
| P48029 | C00300 |
| P48029 | C00698 |
| P48029 | C01330 |
| P48047 | C05359 |
| P48048 | C00238 |
| P48048 | C13881 |
| P48050 | C00238 |
| P48051 | C00238 |
| P48051 | C00293 |
| P48051 | C00723 |
| P48058 | C00302 |
| P48058 | C01373 |
| P48061 | C00076 |
| P48065 | C00334 |
| P48065 | C00698 |
| P48065 | C00719 |
| P48065 | C01330 |
| P48066 | C00334 |
| P48066 | C00698 |
| P48066 | C01330 |
| P48067 | C00037 |
| P48067 | C00698 |
| P48067 | C01330 |
| P48167 | C00037 |
| P48167 | C00698 |
| P48169 | C00334 |
| P48169 | C00698 |
| P48201 | C00282 |
| P48201 | C05359 |
| P48454 | C00391 |
| P48544 | C00238 |
| P48547 | C00238 |
| P48549 | C00238 |
| P48553 | C01330 |
| P48651 | C00716 |
| P48664 | C00025 |
| P48664 | C00045 |
| P48664 | C00049 |
| P48664 | C00302 |
| P48664 | C00402 |
| P48664 | C01330 |

|        |        |
|--------|--------|
| P48664 | C02028 |
| P48664 | C16433 |
| P48723 | C00012 |
| P48751 | C00288 |
| P48751 | C00698 |
| P48764 | C00080 |
| P48764 | C00282 |
| P48764 | C01330 |
| P48995 | C00076 |
| P48995 | C01373 |
| P49146 | C00076 |
| P49279 | C00023 |
| P49279 | C00034 |
| P49279 | C00050 |
| P49279 | C00062 |
| P49279 | C00088 |
| P49279 | C00282 |
| P49279 | C01413 |
| P49279 | C02148 |
| P49281 | C00023 |
| P49281 | C00034 |
| P49281 | C00038 |
| P49281 | C00050 |
| P49281 | C00070 |
| P49281 | C00175 |
| P49281 | C00282 |
| P49281 | C00291 |
| P49281 | C00572 |
| P49281 | C01413 |
| P49281 | C02148 |
| P49281 | C06267 |
| P49281 | C06696 |
| P49321 | C01429 |
| P49447 | C05359 |
| P49448 | C00302 |
| P49675 | C00187 |
| P49763 | C00374 |
| P49768 | C00076 |
| P49790 | C00293 |
| P49792 | C00293 |
| P49810 | C00076 |
| P49821 | C00004 |
| P49821 | C00399 |
| P49821 | C05359 |
| P49840 | C00293 |
| P49908 | C01529 |
| P49914 | C00045 |
| P49914 | C00214 |

|        |        |
|--------|--------|
| P49914 | C00504 |
| P49914 | C06265 |
| P50120 | C00473 |
| P50238 | C00038 |
| P50443 | C00059 |
| P50613 | C00039 |
| P50993 | C00238 |
| P50993 | C01330 |
| P50995 | C00076 |
| P51161 | C01558 |
| P51164 | C00080 |
| P51164 | C00238 |
| P51164 | C00282 |
| P51164 | C01330 |
| P51168 | C01330 |
| P51168 | C06821 |
| P51170 | C01330 |
| P51170 | C06821 |
| P51172 | C01330 |
| P51172 | C06821 |
| P51531 | C00039 |
| P51532 | C00039 |
| P51575 | C00076 |
| P51575 | C01373 |
| P51659 | C00370 |
| P51693 | C00211 |
| P51693 | C00374 |
| P51787 | C00238 |
| P51787 | C00575 |
| P51787 | C00698 |
| P51787 | C07485 |
| P51787 | C14206 |
| P51788 | C00698 |
| P51790 | C00080 |
| P51790 | C00698 |
| P51793 | C00080 |
| P51793 | C00698 |
| P51795 | C00080 |
| P51795 | C00698 |
| P51798 | C00080 |
| P51798 | C00698 |
| P51800 | C00698 |
| P51801 | C00698 |
| P51810 | C00076 |
| P51810 | C00355 |
| P51811 | C00045 |
| P51811 | C01330 |
| P51828 | C00001 |

|        |        |
|--------|--------|
| P51970 | C00004 |
| P51970 | C00399 |
| P51970 | C05359 |
| P52306 | C00035 |
| P52306 | C00044 |
| P52569 | C00045 |
| P52569 | C01602 |
| P52569 | C16440 |
| P52701 | C00039 |
| P52735 | C00215 |
| P52735 | C00242 |
| P52789 | C00293 |
| P52790 | C00293 |
| P52948 | C00293 |
| P52952 | C00076 |
| P52952 | C01330 |
| P53007 | C00149 |
| P53007 | C00158 |
| P53675 | C00293 |
| P53794 | C00137 |
| P53794 | C01330 |
| P53985 | C00022 |
| P53985 | C00033 |
| P53985 | C00060 |
| P53985 | C00164 |
| P53985 | C01432 |
| P53985 | C01450 |
| P53985 | C16434 |
| P53985 | C16436 |
| P53985 | C16439 |
| P54105 | C00215 |
| P54105 | C00698 |
| P54132 | C00039 |
| P54132 | C00305 |
| P54132 | C00434 |
| P54219 | C00706 |
| P54284 | C00076 |
| P54289 | C00076 |
| P54368 | C06702 |
| P54707 | C00080 |
| P54707 | C00238 |
| P54707 | C00282 |
| P54709 | C00238 |
| P54709 | C01330 |
| P54710 | C00238 |
| P54710 | C01330 |
| P54750 | C00575 |
| P54750 | C00942 |

|        |        |
|--------|--------|
| P55011 | C00014 |
| P55011 | C00238 |
| P55011 | C00698 |
| P55011 | C01330 |
| P55011 | C06859 |
| P55017 | C00698 |
| P55017 | C01330 |
| P55036 | C00496 |
| P55042 | C00076 |
| P55055 | C00187 |
| P55055 | C01356 |
| P55056 | C01356 |
| P55058 | C00865 |
| P55058 | C01356 |
| P55064 | C00001 |
| P55064 | C00011 |
| P55072 | C00305 |
| P55073 | C08215 |
| P55087 | C00001 |
| P55157 | C00287 |
| P55157 | C00422 |
| P55157 | C00865 |
| P55157 | C01356 |
| P55259 | C00326 |
| P55263 | C00147 |
| P55263 | C00212 |
| P55263 | C00801 |
| P56134 | C05359 |
| P56181 | C00004 |
| P56181 | C00399 |
| P56181 | C05359 |
| P56211 | C00238 |
| P56211 | C00293 |
| P56373 | C00076 |
| P56373 | C01373 |
| P56381 | C05359 |
| P56385 | C00282 |
| P56385 | C05359 |
| P56539 | C00238 |
| P56539 | C01330 |
| P56556 | C00004 |
| P56556 | C00399 |
| P56556 | C05359 |
| P56559 | C00187 |
| P56696 | C00238 |
| P56696 | C07485 |
| P56696 | C14206 |
| P57057 | C00093 |



|        |        |
|--------|--------|
| P57103 | C00076 |
| P57103 | C01330 |
| P57727 | C01330 |
| P57740 | C00293 |
| P57789 | C00238 |
| P57796 | C00076 |
| P58743 | C00059 |
| P59095 | C01356 |
| P59535 | C00076 |
| P59535 | C01373 |
| P59537 | C00076 |
| P59537 | C01373 |
| P59632 | C00238 |
| P60528 | C00012 |
| P61073 | C00076 |
| P61073 | C00496 |
| P61073 | C00575 |
| P61586 | C00035 |
| P61586 | C00044 |
| P61916 | C00187 |
| P61916 | C00865 |
| P61916 | C05005 |
| P62158 | C00076 |
| P62158 | C08705 |
| P62166 | C00076 |
| P62826 | C00044 |
| P62826 | C00046 |
| P62942 | C00076 |
| P62942 | C08705 |
| P62955 | C00076 |
| P62955 | C00302 |
| P62955 | C11033 |
| P63092 | C00001 |
| P63096 | C00035 |
| P63172 | C00778 |
| P63252 | C00238 |
| P68106 | C00076 |
| P68106 | C08705 |
| P68871 | C00007 |
| P68871 | C00533 |
| P69699 | C01356 |
| P69699 | C01373 |
| P69700 | C01356 |
| P69700 | C01373 |
| P69891 | C00007 |
| P69892 | C00007 |
| P69905 | C00007 |
| P78329 | C00005 |

|        |        |
|--------|--------|
| P78329 | C05359 |
| P78334 | C00334 |
| P78334 | C00698 |
| P78348 | C00076 |
| P78348 | C00174 |
| P78348 | C01330 |
| P78348 | C01373 |
| P78348 | C06821 |
| P78352 | C00174 |
| P78352 | C00238 |
| P78352 | C12269 |
| P78363 | C00376 |
| P78363 | C00473 |
| P78363 | C02110 |
| P78381 | C00052 |
| P78381 | C00215 |
| P78381 | C00282 |
| P78381 | C11477 |
| P78382 | C00055 |
| P78382 | C00128 |
| P78382 | C00174 |
| P78382 | C00282 |
| P78382 | C11477 |
| P78383 | C00052 |
| P78383 | C11477 |
| P78406 | C00293 |
| P78411 | C00238 |
| P78508 | C00238 |
| P78562 | C00009 |
| P80075 | C00076 |
| P80188 | C00023 |
| P81172 | C00023 |
| P82251 | C00045 |
| P82251 | C00326 |
| P82251 | C00491 |
| P82251 | C01330 |
| P82251 | C01420 |
| P82980 | C00473 |
| P89433 | C00326 |
| P98155 | C01356 |
| P98194 | C00034 |
| P98194 | C00076 |
| P98194 | C00305 |
| P98196 | C00865 |
| P98198 | C00865 |
| Q00169 | C00157 |
| Q00169 | C01194 |
| Q00325 | C00009 |

|        |        |
|--------|--------|
| Q00325 | C00080 |
| Q00341 | C01356 |
| Q00839 | C00039 |
| Q008S8 | C00215 |
| Q008S8 | C00242 |
| Q00975 | C00076 |
| Q00975 | C00403 |
| Q01118 | C01330 |
| Q01362 | C00076 |
| Q01484 | C13603 |
| Q01650 | C00045 |
| Q01650 | C00050 |
| Q01650 | C00062 |
| Q01650 | C00078 |
| Q01650 | C00082 |
| Q01650 | C00097 |
| Q01650 | C00355 |
| Q01650 | C01330 |
| Q01650 | C02057 |
| Q01650 | C02465 |
| Q01650 | C08215 |
| Q01650 | C16439 |
| Q01650 | C18672 |
| Q01668 | C00076 |
| Q01668 | C00403 |
| Q01814 | C00076 |
| Q01814 | C00305 |
| Q01959 | C00706 |
| Q01959 | C01330 |
| Q01959 | C03758 |
| Q02094 | C00011 |
| Q02094 | C00014 |
| Q02094 | C01371 |
| Q02156 | C00076 |
| Q02156 | C00716 |
| Q02156 | C00865 |
| Q02246 | C00238 |
| Q02641 | C00076 |
| Q02880 | C00039 |
| Q02978 | C00026 |
| Q02978 | C00149 |
| Q02978 | C00311 |
| Q02978 | C00697 |
| Q02978 | C01432 |
| Q03135 | C00076 |
| Q03181 | C00162 |
| Q03181 | C00293 |
| Q03468 | C00039 |

|        |        |
|--------|--------|
| Q03518 | C00012 |
| Q03518 | C00098 |
| Q03518 | C00326 |
| Q03519 | C00012 |
| Q03519 | C00098 |
| Q03519 | C00326 |
| Q03721 | C00238 |
| Q04446 | C00182 |
| Q04609 | C00504 |
| Q04656 | C00070 |
| Q04671 | C00082 |
| Q04671 | C00158 |
| Q04671 | C05606 |
| Q04671 | C06697 |
| Q04759 | C00076 |
| Q04759 | C00716 |
| Q04759 | C00865 |
| Q04828 | C01558 |
| Q04844 | C01373 |
| Q04844 | C01996 |
| Q05513 | C00076 |
| Q05513 | C00716 |
| Q05513 | C00865 |
| Q05586 | C00076 |
| Q05586 | C00302 |
| Q05586 | C00305 |
| Q05586 | C12269 |
| Q05655 | C00076 |
| Q05655 | C00716 |
| Q05655 | C00865 |
| Q05901 | C01373 |
| Q05901 | C01996 |
| Q05932 | C00504 |
| Q05940 | C00388 |
| Q05940 | C00547 |
| Q05940 | C00706 |
| Q05940 | C00780 |
| Q05940 | C03758 |
| Q06055 | C00282 |
| Q06055 | C05359 |
| Q06432 | C00076 |
| Q06495 | C00009 |
| Q06495 | C01330 |
| Q06609 | C00039 |
| Q06609 | C00271 |
| Q06830 | C00342 |
| Q06830 | C07292 |
| Q07001 | C01373 |

|        |        |
|--------|--------|
| Q07001 | C01996 |
| Q07666 | C00046 |
| Q07699 | C01330 |
| Q07812 | C00524 |
| Q07837 | C00045 |
| Q07837 | C00491 |
| Q07837 | C01330 |
| Q07837 | C01420 |
| Q07869 | C00162 |
| Q07889 | C00035 |
| Q07889 | C00044 |
| Q07890 | C00035 |
| Q07890 | C00044 |
| Q07954 | C00187 |
| Q07954 | C01834 |
| Q08289 | C00076 |
| Q08289 | C13603 |
| Q08357 | C00009 |
| Q08357 | C00174 |
| Q08357 | C01330 |
| Q08357 | C01356 |
| Q08462 | C00001 |
| Q08828 | C00001 |
| Q08945 | C00039 |
| Q08945 | C00434 |
| Q08945 | C06911 |
| Q08AI6 | C00045 |
| Q08AI6 | C01330 |
| Q09327 | C00326 |
| Q09328 | C00326 |
| Q09428 | C00238 |
| Q09428 | C00723 |
| Q09470 | C00238 |
| Q0D2K0 | C00034 |
| Q0D2K0 | C00175 |
| Q0D2K0 | C00305 |
| Q0D2K0 | C13881 |
| Q0D2K0 | C13884 |
| Q0GE19 | C01330 |
| Q0GE19 | C01558 |
| Q0VD83 | C01356 |
| Q10588 | C00076 |
| Q10588 | C13050 |
| Q12767 | C01373 |
| Q12769 | C00046 |
| Q12769 | C00293 |
| Q12769 | C00895 |
| Q12770 | C00370 |

|        |        |
|--------|--------|
| Q12791 | C00076 |
| Q12791 | C00238 |
| Q12802 | C00044 |
| Q12802 | C00215 |
| Q12802 | C00242 |
| Q12809 | C00238 |
| Q12809 | C13240 |
| Q12864 | C00012 |
| Q12879 | C00076 |
| Q12879 | C00302 |
| Q12879 | C00305 |
| Q12879 | C12269 |
| Q12904 | C00293 |
| Q12904 | C01501 |
| Q12907 | C00159 |
| Q12908 | C00403 |
| Q12908 | C01330 |
| Q12908 | C01558 |
| Q12908 | C05122 |
| Q12959 | C00238 |
| Q12967 | C00215 |
| Q12967 | C00242 |
| Q12980 | C00697 |
| Q12983 | C00076 |
| Q13002 | C00302 |
| Q13002 | C01373 |
| Q13126 | C00147 |
| Q13126 | C01733 |
| Q13126 | C06702 |
| Q13127 | C00076 |
| Q13127 | C00238 |
| Q13133 | C00187 |
| Q13133 | C01356 |
| Q13136 | C00082 |
| Q13144 | C00035 |
| Q13183 | C00042 |
| Q13183 | C00158 |
| Q13183 | C01330 |
| Q13183 | C02028 |
| Q13201 | C00752 |
| Q13224 | C00076 |
| Q13224 | C00302 |
| Q13224 | C00305 |
| Q13224 | C12269 |
| Q13286 | C00062 |
| Q13286 | C00076 |
| Q13303 | C00238 |
| Q13303 | C13603 |

|        |        |
|--------|--------|
| Q13322 | C00293 |
| Q13336 | C00086 |
| Q13352 | C08215 |
| Q13433 | C00038 |
| Q13459 | C00076 |
| Q13488 | C00282 |
| Q13501 | C00238 |
| Q13507 | C00076 |
| Q13507 | C01373 |
| Q13520 | C00001 |
| Q13520 | C00174 |
| Q13522 | C00182 |
| Q13563 | C00076 |
| Q13563 | C00698 |
| Q13563 | C01330 |
| Q13563 | C01373 |
| Q13586 | C00076 |
| Q13621 | C00238 |
| Q13621 | C00698 |
| Q13621 | C01330 |
| Q13621 | C06859 |
| Q13671 | C00035 |
| Q13671 | C00044 |
| Q13671 | C00215 |
| Q13671 | C00242 |
| Q13698 | C00076 |
| Q13698 | C00403 |
| Q13733 | C00238 |
| Q13733 | C01330 |
| Q13790 | C00187 |
| Q13790 | C00287 |
| Q13790 | C01356 |
| Q13796 | C01330 |
| Q13829 | C00238 |
| Q13932 | C00076 |
| Q13932 | C00391 |
| Q13932 | C00403 |
| Q13972 | C00035 |
| Q13972 | C00044 |
| Q13972 | C00215 |
| Q14003 | C00238 |
| Q14008 | C00046 |
| Q14028 | C00205 |
| Q14028 | C00215 |
| Q14028 | C00575 |
| Q14028 | C00942 |
| Q14028 | C01373 |
| Q14032 | C00040 |

|        |        |
|--------|--------|
| Q14032 | C01356 |
| Q14032 | C01558 |
| Q14061 | C00070 |
| Q14123 | C00575 |
| Q14123 | C00942 |
| Q14183 | C00076 |
| Q14184 | C00076 |
| Q14184 | C00293 |
| Q14184 | C00723 |
| Q14289 | C00076 |
| Q14289 | C00238 |
| Q14397 | C00293 |
| Q14409 | C00116 |
| Q14410 | C00116 |
| Q14435 | C00009 |
| Q14493 | C01429 |
| Q14500 | C00238 |
| Q14524 | C01330 |
| Q14524 | C11692 |
| Q14542 | C00262 |
| Q14542 | C00396 |
| Q14542 | C00801 |
| Q14542 | C15587 |
| Q14562 | C00046 |
| Q14565 | C00039 |
| Q14571 | C00076 |
| Q14571 | C00575 |
| Q14571 | C01245 |
| Q14573 | C00076 |
| Q14573 | C01245 |
| Q14643 | C00076 |
| Q14643 | C00137 |
| Q14643 | C01245 |
| Q14644 | C00076 |
| Q14644 | C00137 |
| Q14654 | C00238 |
| Q14681 | C00238 |
| Q14721 | C00238 |
| Q14722 | C00238 |
| Q14728 | C06570 |
| Q14802 | C00698 |
| Q14849 | C00187 |
| Q14894 | C08215 |
| Q14916 | C00009 |
| Q14916 | C01330 |
| Q14940 | C00080 |
| Q14940 | C00282 |
| Q14940 | C01330 |



|        |        |
|--------|--------|
| Q14957 | C00076 |
| Q14957 | C00302 |
| Q14957 | C00305 |
| Q14957 | C12269 |
| Q14973 | C00174 |
| Q14973 | C00403 |
| Q14973 | C01330 |
| Q14973 | C01558 |
| Q14973 | C05122 |
| Q14C86 | C00723 |
| Q14CN2 | C00076 |
| Q14CN2 | C00698 |
| Q15012 | C00801 |
| Q15043 | C00023 |
| Q15043 | C00038 |
| Q15049 | C01373 |
| Q15077 | C00015 |
| Q15077 | C00075 |
| Q15080 | C00005 |
| Q15080 | C00007 |
| Q15109 | C00012 |
| Q15121 | C00293 |
| Q15121 | C00723 |
| Q15276 | C00215 |
| Q15311 | C00051 |
| Q15311 | C01661 |
| Q15388 | C00012 |
| Q15391 | C00075 |
| Q15413 | C00076 |
| Q15413 | C08705 |
| Q15438 | C00242 |
| Q15545 | C00750 |
| Q15642 | C00723 |
| Q15651 | C00037 |
| Q15651 | C00293 |
| Q15669 | C01321 |
| Q15700 | C00238 |
| Q15700 | C12269 |
| Q15722 | C00075 |
| Q15722 | C00076 |
| Q15726 | C00076 |
| Q15751 | C00035 |
| Q15751 | C00044 |
| Q15758 | C00045 |
| Q15758 | C01330 |
| Q15758 | C02028 |
| Q15788 | C08215 |
| Q15822 | C01373 |

|        |        |
|--------|--------|
| Q15822 | C01996 |
| Q15825 | C01373 |
| Q15825 | C01996 |
| Q15842 | C00238 |
| Q15843 | C00496 |
| Q15848 | C00187 |
| Q15848 | C00293 |
| Q15849 | C00086 |
| Q15849 | C00840 |
| Q15858 | C01330 |
| Q15858 | C11692 |
| Q15878 | C00076 |
| Q15878 | C00291 |
| Q15878 | C00403 |
| Q16206 | C00003 |
| Q16206 | C05359 |
| Q16222 | C00140 |
| Q16222 | C01074 |
| Q16280 | C00215 |
| Q16280 | C00575 |
| Q16280 | C01373 |
| Q16281 | C00076 |
| Q16281 | C00215 |
| Q16281 | C00575 |
| Q16281 | C00942 |
| Q16281 | C01373 |
| Q16281 | C06958 |
| Q16322 | C00215 |
| Q16322 | C00238 |
| Q16322 | C00575 |
| Q16322 | C01373 |
| Q16348 | C00012 |
| Q16348 | C00080 |
| Q16348 | C00098 |
| Q16348 | C00282 |
| Q16445 | C00334 |
| Q16445 | C00698 |
| Q16515 | C00174 |
| Q16515 | C01330 |
| Q16515 | C01373 |
| Q16515 | C06821 |
| Q16518 | C00376 |
| Q16558 | C00076 |
| Q16558 | C00238 |
| Q16558 | C13837 |
| Q16572 | C01996 |
| Q16627 | C00076 |
| Q16627 | C12405 |

|        |        |
|--------|--------|
| Q16635 | C05359 |
| Q16661 | C00001 |
| Q16678 | C00005 |
| Q16678 | C05359 |
| Q16718 | C00004 |
| Q16718 | C00399 |
| Q16718 | C05359 |
| Q16720 | C00076 |
| Q16720 | C00305 |
| Q16795 | C00004 |
| Q16795 | C00399 |
| Q16795 | C01330 |
| Q16795 | C05359 |
| Q16878 | C00736 |
| Q17RG1 | C00238 |
| Q1EHB4 | C00022 |
| Q1EHB4 | C00060 |
| Q1EHB4 | C00163 |
| Q1EHB4 | C00246 |
| Q1EHB4 | C00253 |
| Q1EHB4 | C01330 |
| Q1EHB4 | C01432 |
| Q29974 | C00012 |
| Q2I0M4 | C00076 |
| Q2I0M4 | C00238 |
| Q2M3G0 | C01661 |
| Q2M3M2 | C00159 |
| Q2M3M2 | C00293 |
| Q2M3M2 | C01330 |
| Q2M3M2 | C10906 |
| Q2NKJ3 | C00039 |
| Q2NKJ3 | C00271 |
| Q2Y0W8 | C00174 |
| Q2Y0W8 | C00288 |
| Q2Y0W8 | C01330 |
| Q2Y0W8 | C12603 |
| Q2Y0W8 | C15473 |
| Q30134 | C00012 |
| Q30167 | C00012 |
| Q30201 | C00023 |
| Q32M45 | C00076 |
| Q32M45 | C00698 |
| Q3KNW5 | C00377 |
| Q3KNW5 | C01330 |
| Q3KNW5 | C01558 |
| Q3KNW5 | C02592 |
| Q3L8U1 | C00039 |
| Q3SYG4 | C00035 |

|        |        |
|--------|--------|
| Q3SYG4 | C00044 |
| Q3ZCQ8 | C00012 |
| Q401N2 | C00038 |
| Q495M3 | C00037 |
| Q495M3 | C00045 |
| Q495M3 | C16435 |
| Q495N2 | C00045 |
| Q4G0N8 | C00080 |
| Q4G0N8 | C00282 |
| Q4G0N8 | C01330 |
| Q4G0X4 | C00238 |
| Q4KMQ2 | C00076 |
| Q4KMQ2 | C00698 |
| Q4KMZ8 | C00238 |
| Q4KMZ8 | C01330 |
| Q4U2R8 | C00059 |
| Q4U2R8 | C00076 |
| Q4U2R8 | C00174 |
| Q4U2R8 | C00242 |
| Q4U2R8 | C00366 |
| Q4U2R8 | C00736 |
| Q4U2R8 | C00954 |
| Q4U2R8 | C01330 |
| Q4U2R8 | C01586 |
| Q4U2R8 | C01926 |
| Q4U2R8 | C02028 |
| Q4U2R8 | C02181 |
| Q4U2R8 | C05151 |
| Q4U2R8 | C05551 |
| Q4U2R8 | C05658 |
| Q4U2R8 | C06810 |
| Q4U2R8 | C06909 |
| Q4U2R8 | C06952 |
| Q4U2R8 | C07017 |
| Q4U2R8 | C07072 |
| Q4U2R8 | C07372 |
| Q4U2R8 | C11277 |
| Q4U2R8 | C11309 |
| Q4U2R8 | C12600 |
| Q4U2R8 | C13008 |
| Q4VNC0 | C01373 |
| Q4VNC1 | C01373 |
| Q4ZJI4 | C00282 |
| Q504Y0 | C00038 |
| Q504Y0 | C00050 |
| Q53GD3 | C00114 |
| Q53S99 | C00504 |
| Q53TN4 | C14819 |

|        |        |
|--------|--------|
| Q5EBM0 | C00396 |
| Q5I7T1 | C00238 |
| Q5JRA6 | C00211 |
| Q5JS13 | C00215 |
| Q5JS13 | C00242 |
| Q5JSL3 | C00035 |
| Q5JSL3 | C00044 |
| Q5JSL3 | C00215 |
| Q5JSL3 | C00242 |
| Q5JUK3 | C00076 |
| Q5JUK3 | C00237 |
| Q5JUK3 | C00238 |
| Q5JUK3 | C00698 |
| Q5JUK3 | C01330 |
| Q5JVL4 | C00076 |
| Q5JXX5 | C00037 |
| Q5JXX5 | C00698 |
| Q5K4L6 | C00162 |
| Q5K4L6 | C00638 |
| Q5NUL3 | C00293 |
| Q5PT55 | C01330 |
| Q5PT55 | C01558 |
| Q5SRD1 | C00012 |
| Q5SRE5 | C00293 |
| Q5SW96 | C00187 |
| Q5SW96 | C01834 |
| Q5T2N8 | C11106 |
| Q5T2W1 | C00009 |
| Q5T2W1 | C00187 |
| Q5T2W1 | C00487 |
| Q5T2W1 | C00698 |
| Q5T2W1 | C01330 |
| Q5T9A4 | C11106 |
| Q5TA50 | C05005 |
| Q5TAH2 | C00080 |
| Q5TAH2 | C00282 |
| Q5TAH2 | C01330 |
| Q5TF39 | C00293 |
| Q5TF39 | C01330 |
| Q5TH69 | C00215 |
| Q5TH69 | C00242 |
| Q5VTU8 | C05359 |
| Q5VU97 | C00076 |
| Q5VV41 | C00035 |
| Q5VV41 | C00044 |
| Q5VXU1 | C00238 |
| Q5VXU1 | C01330 |
| Q5VYX0 | C00706 |

|        |        |
|--------|--------|
| Q5VYX0 | C13512 |
| Q5W0U4 | C00076 |
| Q5XXA6 | C00076 |
| Q5XXA6 | C00698 |
| Q63HQ0 | C18340 |
| Q658P3 | C00023 |
| Q68DU8 | C00238 |
| Q693B1 | C00238 |
| Q695T7 | C00045 |
| Q695T7 | C00698 |
| Q695T7 | C01330 |
| Q695T7 | C16439 |
| Q6AI14 | C00080 |
| Q6AI14 | C00238 |
| Q6AI14 | C00282 |
| Q6AI14 | C01330 |
| Q6AI14 | C11591 |
| Q6AI14 | C15473 |
| Q6B0K9 | C00007 |
| Q6DN90 | C00044 |
| Q6DN90 | C00215 |
| Q6DN90 | C00242 |
| Q6FHJ7 | C00009 |
| Q6FHJ7 | C01330 |
| Q6FI04 | C00018 |
| Q6GPH4 | C00524 |
| Q6IAA8 | C00187 |
| Q6IWH7 | C00076 |
| Q6IWH7 | C00698 |
| Q6J4K2 | C00076 |
| Q6J4K2 | C00238 |
| Q6J4K2 | C01330 |
| Q6J4K2 | C01373 |
| Q6KCM7 | C00009 |
| Q6KCM7 | C00076 |
| Q6KCM7 | C00147 |
| Q6MZM0 | C00070 |
| Q6NUK1 | C00009 |
| Q6NUK1 | C00076 |
| Q6NUK1 | C00147 |
| Q6NVV3 | C00034 |
| Q6NVV3 | C00070 |
| Q6NVV3 | C00175 |
| Q6NVV3 | C00305 |
| Q6NVV3 | C13881 |
| Q6NVV3 | C13884 |
| Q6NVV3 | C14818 |
| Q6NXT4 | C00038 |

|        |        |
|--------|--------|
| Q6P1K1 | C00032 |
| Q6P1M0 | C00162 |
| Q6P1M0 | C00638 |
| Q6P1N0 | C00076 |
| Q6P4A7 | C00023 |
| Q6P4A7 | C01373 |
| Q6P4Q7 | C00050 |
| Q6P5W5 | C00038 |
| Q6P9H4 | C01330 |
| Q6P9H4 | C01780 |
| Q6PCB7 | C00162 |
| Q6PCB7 | C00638 |
| Q6PCB7 | C00723 |
| Q6PI25 | C00302 |
| Q6PI25 | C11033 |
| Q6PI47 | C00238 |
| Q6PIL6 | C00076 |
| Q6PIL6 | C00238 |
| Q6PIS1 | C00072 |
| Q6PIS1 | C01330 |
| Q6PIU1 | C00238 |
| Q6PL18 | C11106 |
| Q6PML9 | C00038 |
| Q6PML9 | C01373 |
| Q6PXP3 | C00293 |
| Q6PXP3 | C00586 |
| Q6PXP3 | C01394 |
| Q6PXP3 | C01496 |
| Q6PXP3 | C01582 |
| Q6PXP3 | C11477 |
| Q6Q788 | C01356 |
| Q6RUJ8 | C00076 |
| Q6U841 | C00288 |
| Q6U841 | C00698 |
| Q6U841 | C01330 |
| Q6UVM3 | C00076 |
| Q6UVM3 | C00238 |
| Q6UVM3 | C00698 |
| Q6UVM3 | C01330 |
| Q6UVM3 | C07518 |
| Q6UWJ1 | C00080 |
| Q6UWJ1 | C00282 |
| Q6UWJ1 | C01330 |
| Q6UXH1 | C01996 |
| Q6XR72 | C00038 |
| Q6XR72 | C01373 |
| Q6YBV0 | C00041 |
| Q6YBV0 | C00045 |

|        |        |
|--------|--------|
| Q6YBV0 | C00078 |
| Q6YBV0 | C01330 |
| Q6YBV0 | C01401 |
| Q6YBV0 | C16435 |
| Q6ZMD2 | C01356 |
| Q6ZMH5 | C00038 |
| Q6ZMH5 | C00050 |
| Q6ZMJ2 | C00023 |
| Q6ZMT4 | C01429 |
| Q6ZNA5 | C14818 |
| Q6ZNA5 | C14819 |
| Q6ZNW5 | C00394 |
| Q6ZQN7 | C00575 |
| Q6ZQN7 | C01330 |
| Q6ZQN7 | C01443 |
| Q6ZQN7 | C01937 |
| Q6ZQN7 | C06956 |
| Q6ZQN7 | C14206 |
| Q6ZRH7 | C01373 |
| Q6ZRS2 | C01429 |
| Q6ZSM3 | C00060 |
| Q6ZSZ5 | C00215 |
| Q6ZSZ5 | C00242 |
| Q6ZWB6 | C00238 |
| Q70625 | C01356 |
| Q70625 | C01373 |
| Q70HW3 | C00019 |
| Q70J99 | C00076 |
| Q70Z35 | C01194 |
| Q70Z44 | C01373 |
| Q719H9 | C00238 |
| Q71RS6 | C00076 |
| Q71RS6 | C00238 |
| Q71RS6 | C01330 |
| Q71RS6 | C01373 |
| Q75007 | C01356 |
| Q75007 | C01373 |
| Q75T13 | C00137 |
| Q75V66 | C00076 |
| Q75V66 | C00698 |
| Q76EJ3 | C00015 |
| Q76EJ3 | C00029 |
| Q76EJ3 | C00035 |
| Q76EJ3 | C00043 |
| Q76EJ3 | C00096 |
| Q76EJ3 | C00144 |
| Q76EJ3 | C00159 |
| Q76EJ3 | C00215 |



|        |        |
|--------|--------|
| Q77376 | C01356 |
| Q77376 | C01373 |
| Q77NP2 | C00326 |
| Q79669 | C01356 |
| Q79669 | C01373 |
| Q7L0Q8 | C00044 |
| Q7L0Q8 | C00215 |
| Q7L0Q8 | C00242 |
| Q7L273 | C00238 |
| Q7LBE3 | C00059 |
| Q7LBE3 | C00209 |
| Q7LBE3 | C00288 |
| Q7LBE3 | C00320 |
| Q7LBE3 | C00698 |
| Q7LBE3 | C11591 |
| Q7LBE5 | C00293 |
| Q7LBE5 | C00723 |
| Q7LBR1 | C11106 |
| Q7LDG7 | C00035 |
| Q7LDG7 | C00044 |
| Q7LDG7 | C00076 |
| Q7LDG7 | C00215 |
| Q7LDG7 | C00242 |
| Q7RTM1 | C00076 |
| Q7RTP0 | C00034 |
| Q7RTP0 | C00175 |
| Q7RTP0 | C00305 |
| Q7RTP0 | C13881 |
| Q7RTP0 | C13884 |
| Q7RTP0 | C14818 |
| Q7RTS1 | C00076 |
| Q7RTT9 | C00212 |
| Q7RTT9 | C00214 |
| Q7RTT9 | C00294 |
| Q7RTT9 | C00299 |
| Q7RTT9 | C00387 |
| Q7RTT9 | C00475 |
| Q7RTT9 | C00547 |
| Q7RTT9 | C00698 |
| Q7RTT9 | C00780 |
| Q7RTT9 | C00801 |
| Q7RTT9 | C01330 |
| Q7RTT9 | C01373 |
| Q7RTT9 | C03758 |
| Q7RTT9 | C11310 |
| Q7RTX7 | C00076 |
| Q7RTX7 | C01373 |
| Q7RTX9 | C00060 |

|        |        |
|--------|--------|
| Q7RTY0 | C00060 |
| Q7RTY1 | C00060 |
| Q7Z2D5 | C00865 |
| Q7Z2E3 | C00020 |
| Q7Z2H8 | C00037 |
| Q7Z2H8 | C00045 |
| Q7Z2H8 | C01401 |
| Q7Z2H8 | C16435 |
| Q7Z2W7 | C01373 |
| Q7Z3B4 | C00293 |
| Q7Z3S7 | C00076 |
| Q7Z418 | C00076 |
| Q7Z418 | C00238 |
| Q7Z418 | C07518 |
| Q7Z475 | C00045 |
| Q7Z4N2 | C00076 |
| Q7Z4N2 | C00376 |
| Q7Z4N2 | C01373 |
| Q7Z4Y8 | C00282 |
| Q7Z4Y8 | C05359 |
| Q7Z5Y7 | C00238 |
| Q861H8 | C00012 |
| Q86SH2 | C01330 |
| Q86SH2 | C01558 |
| Q86TD4 | C00076 |
| Q86U42 | C00895 |
| Q86U42 | C01445 |
| Q86UD5 | C00080 |
| Q86UD5 | C00282 |
| Q86UD5 | C01330 |
| Q86UG4 | C00403 |
| Q86UK0 | C01356 |
| Q86UT5 | C00001 |
| Q86UW1 | C01558 |
| Q86UW2 | C01558 |
| Q86V24 | C00162 |
| Q86V24 | C00293 |
| Q86V24 | C18189 |
| Q86VB7 | C00076 |
| Q86VB7 | C00082 |
| Q86VB7 | C00137 |
| Q86VB7 | C00536 |
| Q86VL8 | C00059 |
| Q86VL8 | C00080 |
| Q86VL8 | C00282 |
| Q86VL8 | C00468 |
| Q86VL8 | C00791 |
| Q86VL8 | C01373 |

|        |        |
|--------|--------|
| Q86VL8 | C06810 |
| Q86VL8 | C06952 |
| Q86VL8 | C07019 |
| Q86VL8 | C07151 |
| Q86VL8 | C07401 |
| Q86VL8 | C07512 |
| Q86VL8 | C11158 |
| Q86VP3 | C00524 |
| Q86VW0 | C00076 |
| Q86VW1 | C00487 |
| Q86VW1 | C01330 |
| Q86VW1 | C01373 |
| Q86VW1 | C01661 |
| Q86VW1 | C07512 |
| Q86VW2 | C00215 |
| Q86VW2 | C00242 |
| Q86W47 | C00076 |
| Q86W47 | C00238 |
| Q86WA9 | C00059 |
| Q86WA9 | C01330 |
| Q86WA9 | C11591 |
| Q86WV5 | C00039 |
| Q86WV5 | C00271 |
| Q86XP0 | C00219 |
| Q86XP0 | C01595 |
| Q86XQ3 | C00076 |
| Q86XQ3 | C01373 |
| Q86Y82 | C00187 |
| Q86YB8 | C00145 |
| Q86YL7 | C00001 |
| Q86YL7 | C00045 |
| Q86YL7 | C00504 |
| Q86YR7 | C00215 |
| Q86YR7 | C00242 |
| Q86YT5 | C00158 |
| Q86YT5 | C00187 |
| Q86YT5 | C01330 |
| Q89843 | C01356 |
| Q89843 | C01373 |
| Q8AYW1 | C00174 |
| Q8AYW1 | C00326 |
| Q8HNP4 | C00282 |
| Q8HNP4 | C05359 |
| Q8IU99 | C00076 |
| Q8IUH4 | C00305 |
| Q8IUH5 | C00305 |
| Q8IUH5 | C01834 |
| Q8IUN9 | C00076 |

|        |        |
|--------|--------|
| Q8IUN9 | C00716 |
| Q8IUN9 | C01074 |
| Q8IUN9 | C01582 |
| Q8IV61 | C00076 |
| Q8IV61 | C00215 |
| Q8IV61 | C00242 |
| Q8IV77 | C00215 |
| Q8IV77 | C00575 |
| Q8IV77 | C01373 |
| Q8IVB4 | C00080 |
| Q8IVB4 | C00282 |
| Q8IVB4 | C01330 |
| Q8IVH4 | C00194 |
| Q8IVJ1 | C00305 |
| Q8IVV8 | C00238 |
| Q8IVV8 | C01330 |
| Q8IVW8 | C01356 |
| Q8IVW8 | C06124 |
| Q8IWA5 | C00114 |
| Q8IWL2 | C01356 |
| Q8IWT1 | C01330 |
| Q8IWU4 | C00038 |
| Q8IWU4 | C00723 |
| Q8IWW8 | C00282 |
| Q8IWZ6 | C00035 |
| Q8IWZ6 | C00044 |
| Q8IXF9 | C00001 |
| Q8IY34 | C00012 |
| Q8IY34 | C00098 |
| Q8IY34 | C00282 |
| Q8IY34 | C00768 |
| Q8IYB8 | C00046 |
| Q8IZD6 | C00179 |
| Q8IZF0 | C00076 |
| Q8IZF0 | C00238 |
| Q8IZF0 | C01330 |
| Q8IZF0 | C01373 |
| Q8IZM9 | C00045 |
| Q8IZM9 | C01330 |
| Q8IZS8 | C00076 |
| Q8IZT8 | C00925 |
| Q8IZY2 | C00187 |
| Q8IZY2 | C00865 |
| Q8MH63 | C00045 |
| Q8N130 | C00009 |
| Q8N130 | C01330 |
| Q8N139 | C01356 |
| Q8N142 | C00020 |

|        |        |
|--------|--------|
| Q8N142 | C00130 |
| Q8N142 | C00215 |
| Q8N142 | C15587 |
| Q8N1C3 | C00334 |
| Q8N1C3 | C00698 |
| Q8N1F7 | C00293 |
| Q8N1I0 | C00035 |
| Q8N1I0 | C00044 |
| Q8N1I0 | C00215 |
| Q8N1I0 | C00242 |
| Q8N1M1 | C00076 |
| Q8N1M1 | C00698 |
| Q8N1S5 | C00038 |
| Q8N1S5 | C00050 |
| Q8N1W1 | C00215 |
| Q8N1W1 | C00242 |
| Q8N2C7 | C01330 |
| Q8N2C7 | C01373 |
| Q8N2C7 | C01836 |
| Q8N2C7 | C16094 |
| Q8N335 | C00003 |
| Q8N335 | C00116 |
| Q8N335 | C01330 |
| Q8N335 | C06696 |
| Q8N370 | C00045 |
| Q8N370 | C00698 |
| Q8N370 | C01330 |
| Q8N3I7 | C00035 |
| Q8N3I7 | C00044 |
| Q8N3R9 | C00334 |
| Q8N4E7 | C00023 |
| Q8N4M1 | C00114 |
| Q8N4T8 | C00472 |
| Q8N4V1 | C00305 |
| Q8N4Y2 | C00076 |
| Q8N5I3 | C00238 |
| Q8N5J4 | C00023 |
| Q8N5Z5 | C00238 |
| Q8N608 | C00238 |
| Q8N668 | C00070 |
| Q8N695 | C00022 |
| Q8N695 | C00033 |
| Q8N695 | C00060 |
| Q8N695 | C00163 |
| Q8N695 | C00164 |
| Q8N695 | C00174 |
| Q8N695 | C00180 |
| Q8N695 | C00186 |

|        |        |
|--------|--------|
| Q8N695 | C00246 |
| Q8N695 | C00256 |
| Q8N695 | C00698 |
| Q8N695 | C00708 |
| Q8N695 | C00803 |
| Q8N695 | C00805 |
| Q8N695 | C01330 |
| Q8N695 | C01432 |
| Q8N695 | C01450 |
| Q8N695 | C14042 |
| Q8N697 | C00012 |
| Q8N697 | C00098 |
| Q8N697 | C00282 |
| Q8N697 | C00768 |
| Q8N6M3 | C01356 |
| Q8N6T7 | C00293 |
| Q8N7X0 | C00007 |
| Q8N8D7 | C00238 |
| Q8N8D7 | C01330 |
| Q8N8Q9 | C00305 |
| Q8N8R3 | C00487 |
| Q8N8Y2 | C00282 |
| Q8N9B8 | C00215 |
| Q8N9B8 | C00242 |
| Q8N9F0 | C00174 |
| Q8N9F0 | C03758 |
| Q8N9F0 | C07164 |
| Q8NB49 | C00865 |
| Q8NBI2 | C14818 |
| Q8NBI2 | C14819 |
| Q8NBQ7 | C00001 |
| Q8NBS3 | C00238 |
| Q8NBS3 | C00282 |
| Q8NBS3 | C00288 |
| Q8NBS3 | C01330 |
| Q8NBS3 | C11477 |
| Q8NBS3 | C13563 |
| Q8NBU5 | C11106 |
| Q8NBW4 | C00045 |
| Q8NBW4 | C01330 |
| Q8NC69 | C00238 |
| Q8NCC5 | C00934 |
| Q8NCK7 | C00060 |
| Q8NCM2 | C00238 |
| Q8NCM2 | C13240 |
| Q8NCS7 | C00114 |
| Q8NCX3 | C06702 |
| Q8NDB2 | C00076 |

|        |        |
|--------|--------|
| Q8NDX2 | C00009 |
| Q8NDX2 | C00025 |
| Q8NDX2 | C00302 |
| Q8NDX2 | C01330 |
| Q8NE01 | C00050 |
| Q8NEC5 | C00076 |
| Q8NEC5 | C01373 |
| Q8NER1 | C00076 |
| Q8NER1 | C01373 |
| Q8NET8 | C00076 |
| Q8NET8 | C01373 |
| Q8NEW0 | C00038 |
| Q8NEW0 | C01373 |
| Q8NFF2 | C00076 |
| Q8NFF2 | C00238 |
| Q8NFF2 | C01330 |
| Q8NFI1 | C01356 |
| Q8NFI3 | C00293 |
| Q8NFI4 | C00293 |
| Q8NFI5 | C00293 |
| Q8NFI9 | C00035 |
| Q8NFI9 | C00044 |
| Q8NFI4 | C00001 |
| Q8NFI0 | C00076 |
| Q8NFI0 | C00698 |
| Q8NFI1 | C00076 |
| Q8NFI1 | C00698 |
| Q8NFI0 | C00039 |
| Q8NG04 | C00288 |
| Q8NG04 | C00698 |
| Q8NHE4 | C00080 |
| Q8NHE4 | C00282 |
| Q8NHX9 | C00076 |
| Q8NHX9 | C13051 |
| Q8NI99 | C00723 |
| Q8TAA5 | C00012 |
| Q8TAA5 | C13028 |
| Q8TAD4 | C00038 |
| Q8TAD4 | C00175 |
| Q8TAD4 | C00723 |
| Q8TAE7 | C00238 |
| Q8TAM2 | C00035 |
| Q8TAM2 | C00044 |
| Q8TB24 | C00035 |
| Q8TB24 | C00044 |
| Q8TB24 | C00215 |
| Q8TB24 | C00242 |
| Q8TB61 | C00053 |

|        |        |
|--------|--------|
| Q8TB61 | C00212 |
| Q8TBB6 | C00045 |
| Q8TBC3 | C00238 |
| Q8TBE1 | C00302 |
| Q8TBE1 | C11033 |
| Q8TBN0 | C00215 |
| Q8TBN0 | C00242 |
| Q8TC29 | C00076 |
| Q8TC92 | C00003 |
| Q8TC92 | C05359 |
| Q8TCC7 | C00468 |
| Q8TCC7 | C05551 |
| Q8TCC7 | C06810 |
| Q8TCC7 | C06952 |
| Q8TCC7 | C06999 |
| Q8TCU3 | C00025 |
| Q8TCU3 | C00045 |
| Q8TCU3 | C00049 |
| Q8TCU3 | C00174 |
| Q8TCU3 | C00302 |
| Q8TCU3 | C01330 |
| Q8TCU3 | C16433 |
| Q8TCU5 | C00076 |
| Q8TCU5 | C00302 |
| Q8TCU5 | C00305 |
| Q8TCU5 | C12269 |
| Q8TCU6 | C01194 |
| Q8TD20 | C00031 |
| Q8TD20 | C00293 |
| Q8TD22 | C00023 |
| Q8TD22 | C00158 |
| Q8TD22 | C01373 |
| Q8TD43 | C00076 |
| Q8TD43 | C00238 |
| Q8TD43 | C01373 |
| Q8TD43 | C13971 |
| Q8TDB8 | C00293 |
| Q8TDD1 | C00046 |
| Q8TDF6 | C00035 |
| Q8TDF6 | C00044 |
| Q8TDF6 | C00165 |
| Q8TDF6 | C00215 |
| Q8TDF6 | C01373 |
| Q8TDG4 | C00039 |
| Q8TDN1 | C00238 |
| Q8TDN2 | C00238 |
| Q8TDS7 | C00076 |
| Q8TDS7 | C00099 |



|        |        |
|--------|--------|
| Q8TE04 | C00010 |
| Q8TE54 | C00059 |
| Q8TE54 | C00174 |
| Q8TE54 | C00209 |
| Q8TE54 | C00288 |
| Q8TE54 | C00698 |
| Q8TE54 | C01330 |
| Q8TE54 | C11591 |
| Q8TE68 | C00242 |
| Q8TED4 | C00934 |
| Q8TEM1 | C00293 |
| Q8TEU7 | C00215 |
| Q8TEU7 | C00242 |
| Q8TF62 | C00865 |
| Q8TF71 | C00045 |
| Q8TF71 | C00060 |
| Q8TF71 | C00539 |
| Q8TF71 | C01021 |
| Q8TF71 | C01330 |
| Q8WTV0 | C00187 |
| Q8WTV0 | C00287 |
| Q8WTV0 | C00338 |
| Q8WTW4 | C00697 |
| Q8WUG5 | C00023 |
| Q8WUG5 | C01373 |
| Q8WUM0 | C00046 |
| Q8WUM0 | C00293 |
| Q8WUM0 | C00895 |
| Q8WUM9 | C00009 |
| Q8WUM9 | C00174 |
| Q8WUM9 | C01330 |
| Q8WUM9 | C01356 |
| Q8WUX1 | C00037 |
| Q8WUX1 | C00045 |
| Q8WUX1 | C00303 |
| Q8WUX1 | C00716 |
| Q8WUX1 | C00768 |
| Q8WUX1 | C01330 |
| Q8WUX1 | C01401 |
| Q8WUX1 | C16438 |
| Q8WUX2 | C01373 |
| Q8WV28 | C10923 |
| Q8WVF5 | C00238 |
| Q8WWA0 | C00293 |
| Q8WWA0 | C00723 |
| Q8WWG9 | C00012 |
| Q8WWG9 | C00238 |
| Q8WWI5 | C00114 |

|        |        |
|--------|--------|
| Q8WWM9 | C00007 |
| Q8WWN9 | C00007 |
| Q8WWN9 | C00242 |
| Q8WWT9 | C01330 |
| Q8WWT9 | C02028 |
| Q8WWT9 | C06265 |
| Q8WWX8 | C00031 |
| Q8WWX8 | C00137 |
| Q8WWX8 | C00293 |
| Q8WWX8 | C01330 |
| Q8WWX8 | C01394 |
| Q8WWX8 | C01719 |
| Q8WWZ4 | C01356 |
| Q8WWZ7 | C00187 |
| Q8WXA8 | C01373 |
| Q8WXG6 | C00035 |
| Q8WXG6 | C00044 |
| Q8WXH2 | C00076 |
| Q8WXH2 | C08705 |
| Q8WXS4 | C00076 |
| Q8WXS5 | C00076 |
| Q8WXS5 | C00302 |
| Q8WXS5 | C11033 |
| Q8WY07 | C00045 |
| Q8WY07 | C00062 |
| Q8WY07 | C01330 |
| Q8WY07 | C01602 |
| Q8WY07 | C16440 |
| Q8WYA0 | C00487 |
| Q8WYP3 | C00035 |
| Q8WYP3 | C00044 |
| Q8WYP3 | C00215 |
| Q8WYP3 | C00242 |
| Q8WZ19 | C00238 |
| Q8WZ55 | C00238 |
| Q8WZ55 | C00698 |
| Q8WZA2 | C00215 |
| Q8WZA2 | C00242 |
| Q8WZA2 | C00575 |
| Q90037 | C00174 |
| Q90037 | C00326 |
| Q92482 | C00001 |
| Q92482 | C00116 |
| Q92496 | C01356 |
| Q92504 | C00038 |
| Q92536 | C00045 |
| Q92536 | C00062 |
| Q92536 | C00237 |

|        |        |
|--------|--------|
| Q92536 | C00303 |
| Q92536 | C00376 |
| Q92536 | C01330 |
| Q92536 | C01602 |
| Q92536 | C16439 |
| Q92538 | C00215 |
| Q92538 | C00242 |
| Q92581 | C00076 |
| Q92581 | C00080 |
| Q92581 | C00238 |
| Q92581 | C00282 |
| Q92581 | C01330 |
| Q92614 | C00039 |
| Q92621 | C00293 |
| Q92643 | C00145 |
| Q92673 | C00187 |
| Q92673 | C01356 |
| Q92673 | C01834 |
| Q92681 | C00293 |
| Q92736 | C00076 |
| Q92736 | C08705 |
| Q92752 | C01330 |
| Q92806 | C00238 |
| Q92823 | C01330 |
| Q92841 | C00046 |
| Q92887 | C06911 |
| Q92888 | C00215 |
| Q92888 | C00242 |
| Q92911 | C00708 |
| Q92911 | C01330 |
| Q92911 | C08215 |
| Q92952 | C00076 |
| Q92952 | C00238 |
| Q92953 | C00238 |
| Q92959 | C00584 |
| Q92959 | C00639 |
| Q92959 | C00696 |
| Q92959 | C01330 |
| Q92959 | C04741 |
| Q92974 | C00035 |
| Q92974 | C00044 |
| Q92974 | C00215 |
| Q92974 | C00242 |
| Q93034 | C00076 |
| Q93050 | C00282 |
| Q93084 | C00076 |
| Q93084 | C00305 |
| Q93086 | C00076 |

|        |        |
|--------|--------|
| Q93086 | C01373 |
| Q95HM8 | C00012 |
| Q969I6 | C00045 |
| Q969I6 | C01330 |
| Q969R2 | C01356 |
| Q969S0 | C00043 |
| Q969S0 | C00190 |
| Q969S0 | C11477 |
| Q969T4 | C01330 |
| Q96A29 | C00035 |
| Q96A46 | C00023 |
| Q96A54 | C00162 |
| Q96A54 | C00293 |
| Q96A54 | C18189 |
| Q96A58 | C00035 |
| Q96A58 | C00044 |
| Q96AA3 | C00930 |
| Q96AA3 | C01356 |
| Q96BD0 | C00403 |
| Q96BD0 | C00468 |
| Q96BD0 | C01330 |
| Q96BD0 | C01829 |
| Q96BD0 | C02465 |
| Q96BD0 | C05122 |
| Q96BD0 | C07639 |
| Q96BD0 | C08215 |
| Q96BI1 | C00282 |
| Q96BI1 | C01373 |
| Q96BI1 | C06527 |
| Q96BI1 | C07625 |
| Q96BR1 | C00238 |
| Q96BW9 | C00012 |
| Q96C36 | C00004 |
| Q96C36 | C00006 |
| Q96CF2 | C11106 |
| Q96CX2 | C00238 |
| Q96D31 | C00076 |
| Q96D96 | C00007 |
| Q96D96 | C00282 |
| Q96DA6 | C00012 |
| Q96DA6 | C13028 |
| Q96DR4 | C01356 |
| Q96DR7 | C00035 |
| Q96DR7 | C00044 |
| Q96DW6 | C00037 |
| Q96DZ5 | C00293 |
| Q96EB6 | C00003 |
| Q96EB6 | C00004 |

|        |        |
|--------|--------|
| Q96EE3 | C00293 |
| Q96EP9 | C01330 |
| Q96EP9 | C01558 |
| Q96F81 | C00012 |
| Q96F81 | C00187 |
| Q96F85 | C00076 |
| Q96FC9 | C00039 |
| Q96FC9 | C00131 |
| Q96FC9 | C00271 |
| Q96FL8 | C00059 |
| Q96FL8 | C00282 |
| Q96FL8 | C00468 |
| Q96FL8 | C00791 |
| Q96FL8 | C00875 |
| Q96FL8 | C06810 |
| Q96FL8 | C06952 |
| Q96FL8 | C07019 |
| Q96FL8 | C07151 |
| Q96FL8 | C07401 |
| Q96FL8 | C07512 |
| Q96FL8 | C08099 |
| Q96FL8 | C11158 |
| Q96FL8 | C13258 |
| Q96FL8 | C14701 |
| Q96FT7 | C00174 |
| Q96FT7 | C01330 |
| Q96FT7 | C01373 |
| Q96FT7 | C06821 |
| Q96FZ7 | C11106 |
| Q96G79 | C00282 |
| Q96G79 | C05227 |
| Q96G79 | C11477 |
| Q96GZ6 | C01373 |
| Q96H72 | C00038 |
| Q96H72 | C00050 |
| Q96HA1 | C00293 |
| Q96HE7 | C00145 |
| Q96J66 | C00051 |
| Q96J66 | C00377 |
| Q96J66 | C00951 |
| Q96J66 | C01227 |
| Q96J66 | C01921 |
| Q96J66 | C01937 |
| Q96J66 | C02166 |
| Q96J66 | C02538 |
| Q96J66 | C05122 |
| Q96J92 | C00238 |
| Q96JA3 | C05005 |

|        |        |
|--------|--------|
| Q96JJ6 | C00076 |
| Q96JJ6 | C08705 |
| Q96JW4 | C00305 |
| Q96KC2 | C00035 |
| Q96KC2 | C00044 |
| Q96KK3 | C00238 |
| Q96L42 | C00238 |
| Q96L42 | C13240 |
| Q96LB2 | C00388 |
| Q96LB2 | C07625 |
| Q96LR9 | C01356 |
| Q96MG2 | C00076 |
| Q96MP8 | C00238 |
| Q96N16 | C00334 |
| Q96N87 | C00045 |
| Q96N87 | C00698 |
| Q96N87 | C01330 |
| Q96NB2 | C00023 |
| Q96NB2 | C01373 |
| Q96NL6 | C01330 |
| Q96NT5 | C00023 |
| Q96NT5 | C00032 |
| Q96NT5 | C00504 |
| Q96NY7 | C00001 |
| Q96NY7 | C00698 |
| Q96P56 | C00076 |
| Q96P56 | C01373 |
| Q96PD7 | C01356 |
| Q96PH1 | C00007 |
| Q96PH1 | C00076 |
| Q96PH1 | C00282 |
| Q96PH1 | C00752 |
| Q96PR1 | C00238 |
| Q96PS8 | C00001 |
| Q96PS8 | C00086 |
| Q96PS8 | C00116 |
| Q96PU5 | C01330 |
| Q96Q91 | C00288 |
| Q96Q91 | C01330 |
| Q96Q91 | C12603 |
| Q96QD8 | C00045 |
| Q96QD8 | C01330 |
| Q96QE2 | C00080 |
| Q96QE2 | C00137 |
| Q96QE2 | C00282 |
| Q96QE3 | C11106 |
| Q96QF0 | C00215 |
| Q96QF0 | C00242 |

|        |        |
|--------|--------|
| Q96QI5 | C00925 |
| Q96QT4 | C00076 |
| Q96QT4 | C00305 |
| Q96QT4 | C00572 |
| Q96QT4 | C00716 |
| Q96QT4 | C01373 |
| Q96QZ7 | C00174 |
| Q96R05 | C00473 |
| Q96RD7 | C00076 |
| Q96RK4 | C00035 |
| Q96RK4 | C00044 |
| Q96RN1 | C00059 |
| Q96RN1 | C00209 |
| Q96RN1 | C00698 |
| Q96RN1 | C11591 |
| Q96RP8 | C00238 |
| Q96RU7 | C00293 |
| Q96S06 | C01834 |
| Q96S37 | C00366 |
| Q96S66 | C00698 |
| Q96SB3 | C00302 |
| Q96SB3 | C11033 |
| Q96SB3 | C12269 |
| Q96SF2 | C00076 |
| Q96SF2 | C00238 |
| Q96SI1 | C00238 |
| Q96SN7 | C00076 |
| Q96SQ9 | C06708 |
| Q96SU4 | C01356 |
| Q96T49 | C00752 |
| Q96T54 | C00174 |
| Q96T54 | C00238 |
| Q96T55 | C00238 |
| Q96T83 | C00080 |
| Q96T83 | C00238 |
| Q96T83 | C00282 |
| Q96T83 | C01330 |
| Q96T83 | C01373 |
| Q96TA2 | C00038 |
| Q99250 | C01330 |
| Q99418 | C00242 |
| Q99429 | C00302 |
| Q99429 | C00698 |
| Q99437 | C00282 |
| Q99497 | C00076 |
| Q99523 | C00293 |
| Q99567 | C00293 |
| Q99571 | C00076 |

|        |        |
|--------|--------|
| Q99571 | C01330 |
| Q99571 | C01373 |
| Q99572 | C00076 |
| Q99572 | C01330 |
| Q99572 | C01373 |
| Q99578 | C00035 |
| Q99578 | C00044 |
| Q99584 | C00070 |
| Q99595 | C00012 |
| Q99624 | C00041 |
| Q99624 | C00045 |
| Q99624 | C00064 |
| Q99624 | C00135 |
| Q99624 | C00152 |
| Q99624 | C00303 |
| Q99624 | C01330 |
| Q99653 | C00238 |
| Q99700 | C00046 |
| Q99712 | C00238 |
| Q99720 | C00238 |
| Q99720 | C01356 |
| Q99726 | C00038 |
| Q99758 | C00187 |
| Q99766 | C00282 |
| Q99808 | C00212 |
| Q99808 | C00801 |
| Q99808 | C13961 |
| Q99884 | C01330 |
| Q99884 | C16435 |
| Q99928 | C00334 |
| Q99928 | C00698 |
| Q9B1D4 | C00390 |
| Q9B1D4 | C00524 |
| Q9B1D4 | C05359 |
| Q9BD17 | C00012 |
| Q9BD37 | C00012 |
| Q9BPW4 | C01356 |
| Q9BPX6 | C00076 |
| Q9BQ13 | C00238 |
| Q9BQ31 | C00238 |
| Q9BQE4 | C00293 |
| Q9BQE5 | C01356 |
| Q9BQS7 | C00023 |
| Q9BQS7 | C00070 |
| Q9BQS7 | C14819 |
| Q9BQT8 | C00036 |
| Q9BQT8 | C00158 |
| Q9BQT8 | C00322 |



|        |        |
|--------|--------|
| Q9BQT8 | C00489 |
| Q9BQT8 | C02656 |
| Q9BQT8 | C06104 |
| Q9BQT8 | C16588 |
| Q9BR39 | C00076 |
| Q9BR39 | C08705 |
| Q9BRI3 | C00038 |
| Q9BRI3 | C01373 |
| Q9BRQ5 | C00076 |
| Q9BRV3 | C11477 |
| Q9BRY0 | C00038 |
| Q9BS26 | C00076 |
| Q9BS91 | C00215 |
| Q9BS91 | C00282 |
| Q9BS91 | C05227 |
| Q9BS91 | C11477 |
| Q9BSA4 | C00076 |
| Q9BSA4 | C00698 |
| Q9BSW2 | C00076 |
| Q9BT67 | C00023 |
| Q9BT67 | C02148 |
| Q9BU23 | C01834 |
| Q9BU40 | C00376 |
| Q9BUM1 | C00293 |
| Q9BUR5 | C00187 |
| Q9BUR5 | C01356 |
| Q9BUX1 | C01373 |
| Q9BV35 | C00009 |
| Q9BV35 | C00076 |
| Q9BV35 | C00147 |
| Q9BVG9 | C00716 |
| Q9BVL2 | C00293 |
| Q9BVV7 | C00012 |
| Q9BW27 | C00293 |
| Q9BWE0 | C00039 |
| Q9BWG6 | C01330 |
| Q9BWM7 | C00023 |
| Q9BWM7 | C01373 |
| Q9BWW8 | C01356 |
| Q9BWW9 | C01356 |
| Q9BX79 | C00473 |
| Q9BX84 | C00076 |
| Q9BX84 | C00305 |
| Q9BX84 | C00716 |
| Q9BX84 | C01373 |
| Q9BXB4 | C01356 |
| Q9BXB5 | C01356 |
| Q9BXC9 | C00035 |

|        |        |
|--------|--------|
| Q9BXC9 | C00044 |
| Q9BXI2 | C00077 |
| Q9BXI2 | C01602 |
| Q9BXP2 | C00238 |
| Q9BXP2 | C00698 |
| Q9BXP2 | C01373 |
| Q9BXS9 | C00059 |
| Q9BXT2 | C00076 |
| Q9BXU8 | C00023 |
| Q9BXW6 | C01356 |
| Q9BY07 | C00288 |
| Q9BY07 | C01330 |
| Q9BY07 | C12603 |
| Q9BY32 | C00081 |
| Q9BY43 | C11106 |
| Q9BYP7 | C01330 |
| Q9BYP7 | C17061 |
| Q9BYT9 | C00076 |
| Q9BYT9 | C00698 |
| Q9BYW1 | C00293 |
| Q9BYW1 | C11477 |
| Q9BZ29 | C00035 |
| Q9BZ29 | C00044 |
| Q9BZ29 | C00215 |
| Q9BZ29 | C00242 |
| Q9BZ71 | C01194 |
| Q9BZC7 | C00187 |
| Q9BZD2 | C00147 |
| Q9BZD2 | C00212 |
| Q9BZD2 | C00262 |
| Q9BZD2 | C00299 |
| Q9BZD2 | C00801 |
| Q9BZD2 | C07210 |
| Q9BZD2 | C08431 |
| Q9BZD2 | C12806 |
| Q9BZF1 | C01356 |
| Q9BZF2 | C01356 |
| Q9BZF3 | C01356 |
| Q9BZV2 | C00378 |
| Q9BZV2 | C00504 |
| Q9BZW2 | C00059 |
| Q9BZW2 | C01330 |
| Q9BZY2 | C00076 |
| Q9C0H2 | C00076 |
| Q9C0H2 | C00698 |
| Q9C0K1 | C00038 |
| Q9GIP4 | C00045 |
| Q9GIX6 | C00012 |

|        |        |
|--------|--------|
| Q9GJ56 | C00012 |
| Q9GZN6 | C00698 |
| Q9GZN6 | C01330 |
| Q9GZQ4 | C00076 |
| Q9GZQ4 | C00698 |
| Q9GZU1 | C00023 |
| Q9GZU1 | C00076 |
| Q9GZU1 | C01373 |
| Q9GZV3 | C00114 |
| Q9GZV3 | C01330 |
| Q9GZV9 | C00009 |
| Q9GZZ6 | C00076 |
| Q9GZZ6 | C00238 |
| Q9H015 | C00487 |
| Q9H015 | C01330 |
| Q9H015 | C01373 |
| Q9H015 | C05570 |
| Q9H015 | C07512 |
| Q9H078 | C00238 |
| Q9H0C2 | C00147 |
| Q9H0C2 | C00215 |
| Q9H0H5 | C00059 |
| Q9H0U3 | C00305 |
| Q9H0X2 | C00076 |
| Q9H0X2 | C01373 |
| Q9H0X9 | C00187 |
| Q9H172 | C00187 |
| Q9H172 | C01356 |
| Q9H173 | C00215 |
| Q9H1C4 | C00215 |
| Q9H1D0 | C00076 |
| Q9H1D0 | C01373 |
| Q9H1H9 | C00159 |
| Q9H1H9 | C18340 |
| Q9H1K4 | C00080 |
| Q9H1K4 | C00302 |
| Q9H1N7 | C00053 |
| Q9H1N7 | C00212 |
| Q9H1P3 | C01356 |
| Q9H1V8 | C00037 |
| Q9H1V8 | C00045 |
| Q9H1V8 | C00698 |
| Q9H1V8 | C01330 |
| Q9H1V8 | C01401 |
| Q9H1V8 | C16435 |
| Q9H1V8 | C16439 |
| Q9H221 | C00187 |
| Q9H221 | C00370 |

|        |        |
|--------|--------|
| Q9H222 | C00187 |
| Q9H222 | C00370 |
| Q9H251 | C00076 |
| Q9H252 | C00238 |
| Q9H252 | C13240 |
| Q9H2B4 | C00059 |
| Q9H2C2 | C00370 |
| Q9H2D1 | C00504 |
| Q9H2H9 | C00045 |
| Q9H2H9 | C00303 |
| Q9H2H9 | C01330 |
| Q9H2J7 | C00045 |
| Q9H2J7 | C00698 |
| Q9H2J7 | C01330 |
| Q9H2J7 | C16435 |
| Q9H2J7 | C16439 |
| Q9H2S1 | C00076 |
| Q9H2S1 | C00238 |
| Q9H2V7 | C01356 |
| Q9H2X3 | C00012 |
| Q9H2X9 | C00238 |
| Q9H2X9 | C00698 |
| Q9H2X9 | C01330 |
| Q9H2Y9 | C00403 |
| Q9H310 | C00014 |
| Q9H310 | C01371 |
| Q9H313 | C00023 |
| Q9H313 | C00698 |
| Q9H3F6 | C00238 |
| Q9H3M0 | C00238 |
| Q9H427 | C00174 |
| Q9H427 | C00238 |
| Q9H444 | C11106 |
| Q9H598 | C00037 |
| Q9H598 | C00045 |
| Q9H598 | C00282 |
| Q9H598 | C00334 |
| Q9H668 | C00039 |
| Q9H668 | C00271 |
| Q9H6E5 | C00075 |
| Q9H6E5 | C00895 |
| Q9H6F2 | C00076 |
| Q9H6F2 | C00238 |
| Q9H6F2 | C01373 |
| Q9H6S3 | C00242 |
| Q9H6Z4 | C00215 |
| Q9H6Z4 | C00242 |
| Q9H7F0 | C01373 |

|        |        |
|--------|--------|
| Q9H814 | C00044 |
| Q9H814 | C00046 |
| Q9H814 | C00562 |
| Q9H8M5 | C00034 |
| Q9H8M5 | C00050 |
| Q9H8M5 | C00070 |
| Q9H8M5 | C00175 |
| Q9H8M5 | C00305 |
| Q9H8M5 | C01373 |
| Q9H8M5 | C02148 |
| Q9H8M5 | C13881 |
| Q9H8M5 | C13884 |
| Q9H8M5 | C14818 |
| Q9H8V3 | C00215 |
| Q9H8V3 | C00242 |
| Q9H936 | C00025 |
| Q9H936 | C00080 |
| Q9H936 | C00302 |
| Q9H999 | C00010 |
| Q9H9B4 | C00023 |
| Q9H9B4 | C01373 |
| Q9HAB3 | C00255 |
| Q9HAB3 | C01330 |
| Q9HAP6 | C00174 |
| Q9HAP6 | C00334 |
| Q9HAS3 | C00214 |
| Q9HAS3 | C00294 |
| Q9HAS3 | C00396 |
| Q9HAS3 | C00801 |
| Q9HAS3 | C01330 |
| Q9HAS3 | C07210 |
| Q9HAS3 | C07234 |
| Q9HAS3 | C07650 |
| Q9HAS3 | C15587 |
| Q9HAV7 | C00012 |
| Q9HAV7 | C13028 |
| Q9HB14 | C00238 |
| Q9HB14 | C07515 |
| Q9HB15 | C00238 |
| Q9HB15 | C07515 |
| Q9HB89 | C00076 |
| Q9HB89 | C00698 |
| Q9HBA0 | C00076 |
| Q9HBA0 | C00391 |
| Q9HBA0 | C01373 |
| Q9HBG4 | C00174 |
| Q9HBG4 | C00282 |
| Q9HBL8 | C00005 |

|        |        |
|--------|--------|
| Q9HBL8 | C00006 |
| Q9HBR0 | C00045 |
| Q9HBR0 | C01330 |
| Q9HBY8 | C00238 |
| Q9HBY8 | C01330 |
| Q9HC10 | C00076 |
| Q9HC21 | C12652 |
| Q9HC58 | C00076 |
| Q9HC58 | C00238 |
| Q9HC58 | C01330 |
| Q9HC96 | C00293 |
| Q9HCE9 | C00076 |
| Q9HCE9 | C00698 |
| Q9HCG7 | C00550 |
| Q9HCG7 | C05005 |
| Q9HCJ1 | C00009 |
| Q9HCJ1 | C00013 |
| Q9HCK8 | C00039 |
| Q9HCP6 | C00116 |
| Q9HCX4 | C00076 |
| Q9HCX4 | C01373 |
| Q9HD20 | C01373 |
| Q9HD23 | C00305 |
| Q9HD26 | C00174 |
| Q9HD26 | C00698 |
| Q9HD42 | C11106 |
| Q9HD89 | C00736 |
| Q9HDC5 | C00076 |
| Q9HDC5 | C08705 |
| Q9IDV3 | C01356 |
| Q9IDV3 | C01373 |
| Q9MY54 | C00012 |
| Q9MY56 | C00012 |
| Q9NNX6 | C00012 |
| Q9NP58 | C00032 |
| Q9NP58 | C01413 |
| Q9NP59 | C00023 |
| Q9NP78 | C00012 |
| Q9NP78 | C00098 |
| Q9NP86 | C00076 |
| Q9NP91 | C00037 |
| Q9NP91 | C00045 |
| Q9NP91 | C00076 |
| Q9NP91 | C00148 |
| Q9NP91 | C00698 |
| Q9NP91 | C01330 |
| Q9NP91 | C16435 |
| Q9NP94 | C00038 |

|        |        |
|--------|--------|
| Q9NPA1 | C00076 |
| Q9NPA1 | C00238 |
| Q9NPC2 | C00174 |
| Q9NPC2 | C00238 |
| Q9NPD5 | C00403 |
| Q9NPD5 | C00951 |
| Q9NPD5 | C01330 |
| Q9NPD5 | C01558 |
| Q9NPD5 | C01937 |
| Q9NPD5 | C02166 |
| Q9NPD5 | C02465 |
| Q9NPD5 | C04555 |
| Q9NPD5 | C05122 |
| Q9NPD5 | C11363 |
| Q9NPG2 | C00007 |
| Q9NPH5 | C00007 |
| Q9NPH5 | C00238 |
| Q9NPI9 | C00238 |
| Q9NPQ8 | C00035 |
| Q9NPQ8 | C00044 |
| Q9NPY2 | C00315 |
| Q9NPY2 | C06702 |
| Q9NQ11 | C01373 |
| Q9NQ40 | C00255 |
| Q9NQ40 | C01330 |
| Q9NQ90 | C00076 |
| Q9NQ90 | C00698 |
| Q9NQ92 | C01429 |
| Q9NQA5 | C00076 |
| Q9NQA5 | C01373 |
| Q9NQR9 | C00293 |
| Q9NQS5 | C00162 |
| Q9NQW8 | C00076 |
| Q9NQW8 | C00215 |
| Q9NQW8 | C00575 |
| Q9NQW8 | C00942 |
| Q9NQW8 | C01373 |
| Q9NQW8 | C06958 |
| Q9NR50 | C00035 |
| Q9NR82 | C00238 |
| Q9NR82 | C07473 |
| Q9NRA2 | C00174 |
| Q9NRA2 | C00282 |
| Q9NRA2 | C01330 |
| Q9NRD0 | C00242 |
| Q9NRG9 | C00293 |
| Q9NRJ3 | C00076 |
| Q9NRK6 | C00032 |

|        |        |
|--------|--------|
| Q9NRK6 | C00098 |
| Q9NRM0 | C00282 |
| Q9NRM0 | C00293 |
| Q9NRM0 | C00366 |
| Q9NRM0 | C01496 |
| Q9NRM0 | C11477 |
| Q9NRQ2 | C00076 |
| Q9NRQ2 | C00865 |
| Q9NRU3 | C00050 |
| Q9NRX5 | C00065 |
| Q9NRY6 | C00076 |
| Q9NRY6 | C00865 |
| Q9NRY7 | C00076 |
| Q9NRY7 | C00865 |
| Q9NS18 | C00145 |
| Q9NS40 | C00238 |
| Q9NS40 | C13240 |
| Q9NS69 | C00012 |
| Q9NS82 | C00045 |
| Q9NS82 | C00065 |
| Q9NS82 | C01330 |
| Q9NSA0 | C00059 |
| Q9NSA0 | C00468 |
| Q9NSA0 | C01330 |
| Q9NSA0 | C04555 |
| Q9NSA1 | C00293 |
| Q9NSA2 | C00238 |
| Q9NSD5 | C00334 |
| Q9NSD5 | C00698 |
| Q9NSD5 | C01330 |
| Q9NSY2 | C01356 |
| Q9NTG1 | C00076 |
| Q9NTI2 | C00865 |
| Q9NTM9 | C00070 |
| Q9NTN3 | C00015 |
| Q9NTN3 | C00174 |
| Q9NTN3 | C01074 |
| Q9NUL3 | C00046 |
| Q9NUL7 | C00046 |
| Q9NUL7 | C00305 |
| Q9NUM3 | C00038 |
| Q9NUM3 | C00050 |
| Q9NUP9 | C00334 |
| Q9NUV9 | C00035 |
| Q9NUV9 | C00044 |
| Q9NUV9 | C00305 |
| Q9NVC3 | C00045 |
| Q9NVC3 | C01330 |



|        |        |
|--------|--------|
| Q9NVE7 | C00010 |
| Q9NVI7 | C11106 |
| Q9NVN3 | C00035 |
| Q9NVN3 | C00044 |
| Q9NVN3 | C00215 |
| Q9NVN3 | C00242 |
| Q9NVN3 | C00575 |
| Q9NVP2 | C01429 |
| Q9NVT9 | C00050 |
| Q9NVV0 | C00076 |
| Q9NVV0 | C00238 |
| Q9NVV0 | C01373 |
| Q9NW15 | C00076 |
| Q9NW15 | C00698 |
| Q9NW64 | C00076 |
| Q9NWB1 | C00046 |
| Q9NWF4 | C00255 |
| Q9NWF4 | C01330 |
| Q9NX18 | C00042 |
| Q9NX18 | C00399 |
| Q9NX18 | C05359 |
| Q9NXV2 | C00238 |
| Q9NY12 | C01373 |
| Q9NY26 | C00038 |
| Q9NY37 | C01330 |
| Q9NY37 | C01373 |
| Q9NY37 | C06821 |
| Q9NY46 | C01330 |
| Q9NY47 | C00076 |
| Q9NY64 | C00031 |
| Q9NY64 | C00293 |
| Q9NY64 | C00723 |
| Q9NY64 | C01496 |
| Q9NY64 | C11477 |
| Q9NY72 | C01330 |
| Q9NY91 | C00293 |
| Q9NY91 | C01330 |
| Q9NYB5 | C00403 |
| Q9NYB5 | C00468 |
| Q9NYB5 | C00951 |
| Q9NYB5 | C01330 |
| Q9NYB5 | C02465 |
| Q9NYB5 | C07639 |
| Q9NYB5 | C08215 |
| Q9NYB5 | C11363 |
| Q9NYG8 | C00219 |
| Q9NYG8 | C00238 |
| Q9NYV7 | C00076 |

|        |        |
|--------|--------|
| Q9NYV7 | C01373 |
| Q9NYW0 | C00076 |
| Q9NYW0 | C01373 |
| Q9NYW1 | C00076 |
| Q9NYW1 | C01373 |
| Q9NYW3 | C00076 |
| Q9NYW3 | C01373 |
| Q9NYW5 | C00076 |
| Q9NYW5 | C01373 |
| Q9NYW6 | C00076 |
| Q9NYW6 | C01373 |
| Q9NYZ2 | C00023 |
| Q9NYZ2 | C00032 |
| Q9NZ53 | C00572 |
| Q9NZ53 | C05359 |
| Q9NZA1 | C00698 |
| Q9NZC9 | C00039 |
| Q9NZD2 | C05005 |
| Q9NZI1 | C00076 |
| Q9NZI1 | C00238 |
| Q9NZI2 | C00076 |
| Q9NZI2 | C00238 |
| Q9NZJ9 | C00046 |
| Q9NZL6 | C00215 |
| Q9NZL6 | C00242 |
| Q9NZM6 | C01373 |
| Q9NZN1 | C00076 |
| Q9NZQ8 | C00076 |
| Q9NZQ8 | C00238 |
| Q9NZQ8 | C01330 |
| Q9NZQ8 | C01373 |
| Q9NZQ8 | C13971 |
| Q9NZU7 | C00076 |
| Q9NZU7 | C00391 |
| Q9NZV8 | C00238 |
| Q9NZZ3 | C11106 |
| Q9P0J7 | C00238 |
| Q9P0L9 | C00076 |
| Q9P0L9 | C01373 |
| Q9P0X4 | C00076 |
| Q9P0X4 | C00291 |
| Q9P0X4 | C07222 |
| Q9P1Z3 | C00215 |
| Q9P1Z3 | C00238 |
| Q9P1Z3 | C01330 |
| Q9P241 | C00865 |
| Q9P241 | C01373 |
| Q9P246 | C00076 |

|        |        |
|--------|--------|
| Q9P2D8 | C01330 |
| Q9P2D8 | C01373 |
| Q9P2D8 | C01836 |
| Q9P2D8 | C16094 |
| Q9P2E2 | C12269 |
| Q9P2K9 | C01356 |
| Q9P2U7 | C00009 |
| Q9P2U7 | C00025 |
| Q9P2U7 | C00302 |
| Q9P2U7 | C01330 |
| Q9P2U8 | C00009 |
| Q9P2U8 | C00025 |
| Q9P2U8 | C00302 |
| Q9P2U8 | C01330 |
| Q9QSQ8 | C01356 |
| Q9QSQ8 | C01373 |
| Q9TQE0 | C00012 |
| Q9UBD6 | C00014 |
| Q9UBD6 | C00706 |
| Q9UBD6 | C01371 |
| Q9UBG0 | C00211 |
| Q9UBL9 | C00076 |
| Q9UBL9 | C01373 |
| Q9UBN1 | C00076 |
| Q9UBN1 | C00302 |
| Q9UBN1 | C11033 |
| Q9UBN4 | C00076 |
| Q9UBN4 | C01373 |
| Q9UBN4 | C13881 |
| Q9UBP9 | C00187 |
| Q9UBP9 | C01356 |
| Q9UBP9 | C02690 |
| Q9UBS5 | C00076 |
| Q9UBS5 | C00137 |
| Q9UBS5 | C00238 |
| Q9UBS5 | C00334 |
| Q9UBU3 | C18181 |
| Q9UBX3 | C00009 |
| Q9UBX3 | C00042 |
| Q9UBX3 | C00059 |
| Q9UBX3 | C00094 |
| Q9UBX3 | C00149 |
| Q9UBX3 | C00320 |
| Q9UBX3 | C00383 |
| Q9UBX3 | C02028 |
| Q9UBY0 | C00080 |
| Q9UBY0 | C00282 |
| Q9UBY0 | C01330 |

|        |        |
|--------|--------|
| Q9UBY8 | C01356 |
| Q9UCZ3 | C00238 |
| Q9UDW1 | C00390 |
| Q9UDW1 | C00524 |
| Q9UDW1 | C05359 |
| Q9UDX3 | C00751 |
| Q9UDX4 | C00751 |
| Q9UES8 | C00777 |
| Q9UF02 | C00076 |
| Q9UF02 | C00302 |
| Q9UF02 | C11033 |
| Q9UF72 | C06911 |
| Q9UG63 | C00023 |
| Q9UGH3 | C00072 |
| Q9UGH3 | C00282 |
| Q9UGH3 | C00701 |
| Q9UGH3 | C01330 |
| Q9UGI6 | C00076 |
| Q9UGI6 | C00238 |
| Q9UGJ0 | C00293 |
| Q9UGK8 | C00215 |
| Q9UGK8 | C00242 |
| Q9UGM1 | C00076 |
| Q9UGM1 | C00238 |
| Q9UGQ2 | C00076 |
| Q9UGQ3 | C00031 |
| Q9UGQ3 | C00293 |
| Q9UHC3 | C00174 |
| Q9UHC3 | C01330 |
| Q9UHC3 | C01373 |
| Q9UHC3 | C06821 |
| Q9UHC6 | C00238 |
| Q9UHC9 | C00187 |
| Q9UHC9 | C01356 |
| Q9UHI5 | C00041 |
| Q9UHI5 | C00045 |
| Q9UHI5 | C00050 |
| Q9UHI5 | C00062 |
| Q9UHI5 | C00078 |
| Q9UHI5 | C00079 |
| Q9UHI5 | C00082 |
| Q9UHI5 | C00097 |
| Q9UHI5 | C00303 |
| Q9UHI5 | C00716 |
| Q9UHI5 | C00736 |
| Q9UHI5 | C01330 |
| Q9UHI5 | C01373 |
| Q9UHI5 | C01401 |

|        |        |
|--------|--------|
| Q9UHI5 | C02057 |
| Q9UHI5 | C16439 |
| Q9UHI5 | C18672 |
| Q9UHI7 | C00072 |
| Q9UHI7 | C00701 |
| Q9UHI7 | C01330 |
| Q9UHI7 | C05422 |
| Q9UHV5 | C00215 |
| Q9UHV5 | C00242 |
| Q9UHW9 | C00238 |
| Q9UHW9 | C00698 |
| Q9UHW9 | C01330 |
| Q9UI32 | C00303 |
| Q9UI33 | C01330 |
| Q9UI33 | C11692 |
| Q9UI40 | C00076 |
| Q9UI40 | C00205 |
| Q9UI40 | C00238 |
| Q9UI40 | C00376 |
| Q9UI40 | C01330 |
| Q9UIA0 | C00242 |
| Q9UID3 | C01356 |
| Q9UIG8 | C00059 |
| Q9UIG8 | C00082 |
| Q9UIG8 | C00403 |
| Q9UIG8 | C00468 |
| Q9UIG8 | C00840 |
| Q9UIG8 | C01330 |
| Q9UIG8 | C04741 |
| Q9UIG8 | C05122 |
| Q9UIG8 | C06956 |
| Q9UIG8 | C18095 |
| Q9UIX4 | C00238 |
| Q9UIZ6 | C00012 |
| Q9UJ41 | C00035 |
| Q9UJ41 | C00044 |
| Q9UJ41 | C00215 |
| Q9UJ71 | C00076 |
| Q9UJ71 | C00159 |
| Q9UJ90 | C00238 |
| Q9UJ96 | C00238 |
| Q9UJS0 | C00025 |
| Q9UJS0 | C00049 |
| Q9UJS0 | C00076 |
| Q9UJS0 | C00302 |
| Q9UJS0 | C16433 |
| Q9UJU2 | C00039 |
| Q9UK17 | C00238 |

|        |        |
|--------|--------|
| Q9UK73 | C00293 |
| Q9UKA9 | C00046 |
| Q9UKF7 | C01194 |
| Q9UKF7 | C01356 |
| Q9UKG1 | C00293 |
| Q9UKG4 | C00059 |
| Q9UKG4 | C01330 |
| Q9UKL6 | C00157 |
| Q9UKU0 | C00162 |
| Q9UKU0 | C01356 |
| Q9UKW4 | C00215 |
| Q9UKW4 | C00242 |
| Q9UKX7 | C00293 |
| Q9UL51 | C00215 |
| Q9UL51 | C00238 |
| Q9UL51 | C01330 |
| Q9UL62 | C00076 |
| Q9UL62 | C01373 |
| Q9ULA0 | C00012 |
| Q9ULD8 | C00238 |
| Q9ULD8 | C13240 |
| Q9ULF5 | C00038 |
| Q9ULF5 | C00050 |
| Q9ULG1 | C00039 |
| Q9ULI0 | C11106 |
| Q9ULQ1 | C00076 |
| Q9ULQ1 | C13051 |
| Q9ULS6 | C00238 |
| Q9ULU8 | C00076 |
| Q9ULZ1 | C13662 |
| Q9UM01 | C00045 |
| Q9UM01 | C00062 |
| Q9UM01 | C00237 |
| Q9UM01 | C00303 |
| Q9UM01 | C01330 |
| Q9UM01 | C16439 |
| Q9UM21 | C00293 |
| Q9UMX9 | C05606 |
| Q9UMZ3 | C01194 |
| Q9UN42 | C00238 |
| Q9UN42 | C01330 |
| Q9UN57 | C00076 |
| Q9UN57 | C00238 |
| Q9UN76 | C00045 |
| Q9UN76 | C00698 |
| Q9UN76 | C01330 |
| Q9UN76 | C16435 |
| Q9UN88 | C00334 |

|        |        |
|--------|--------|
| Q9UN88 | C00698 |
| Q9UNQ0 | C00032 |
| Q9UNQ0 | C01661 |
| Q9UNQ0 | C01907 |
| Q9UNQ0 | C06708 |
| Q9UNQ0 | C11190 |
| Q9UNQ0 | C11195 |
| Q9UNX9 | C00238 |
| Q9UNX9 | C13881 |
| Q9UNY4 | C00039 |
| Q9UP52 | C00023 |
| Q9UP79 | C00009 |
| Q9UP95 | C00238 |
| Q9UP95 | C00698 |
| Q9UP95 | C01330 |
| Q9UPI3 | C00032 |
| Q9UPI3 | C00076 |
| Q9UPR5 | C00076 |
| Q9UPR5 | C01330 |
| Q9UPY5 | C00045 |
| Q9UPY5 | C00076 |
| Q9UPY5 | C00302 |
| Q9UPY5 | C01330 |
| Q9UPY5 | C01420 |
| Q9UQ05 | C00238 |
| Q9UQ05 | C13240 |
| Q9UQ53 | C00420 |
| Q9UQ90 | C00038 |
| Q9UQC9 | C00076 |
| Q9UQC9 | C00698 |
| Q9UQD0 | C01330 |
| Q9UQN3 | C11106 |
| Q9Y210 | C00076 |
| Q9Y210 | C01373 |
| Q9Y217 | C00076 |
| Q9Y217 | C00238 |
| Q9Y217 | C01194 |
| Q9Y226 | C01373 |
| Q9Y227 | C00015 |
| Q9Y227 | C00035 |
| Q9Y227 | C00044 |
| Q9Y227 | C00063 |
| Q9Y227 | C00075 |
| Q9Y227 | C00112 |
| Q9Y227 | C00459 |
| Q9Y230 | C00039 |
| Q9Y230 | C00271 |
| Q9Y230 | C05426 |

|        |        |
|--------|--------|
| Q9Y233 | C00575 |
| Q9Y233 | C00942 |
| Q9Y253 | C00396 |
| Q9Y257 | C00238 |
| Q9Y261 | C00293 |
| Q9Y265 | C00039 |
| Q9Y265 | C00271 |
| Q9Y265 | C05426 |
| Q9Y267 | C01373 |
| Q9Y277 | C00147 |
| Q9Y289 | C00120 |
| Q9Y289 | C00725 |
| Q9Y289 | C00864 |
| Q9Y289 | C01330 |
| Q9Y294 | C01429 |
| Q9Y2C5 | C00009 |
| Q9Y2C5 | C01330 |
| Q9Y2D2 | C00013 |
| Q9Y2D2 | C00015 |
| Q9Y2D2 | C00043 |
| Q9Y2D2 | C00282 |
| Q9Y2D2 | C00299 |
| Q9Y2D2 | C11477 |
| Q9Y2E8 | C00080 |
| Q9Y2E8 | C00282 |
| Q9Y2E8 | C01330 |
| Q9Y2G3 | C00865 |
| Q9Y2P4 | C00162 |
| Q9Y2P4 | C00638 |
| Q9Y2P5 | C00162 |
| Q9Y2P5 | C01558 |
| Q9Y2Q0 | C00865 |
| Q9Y2Q0 | C01373 |
| Q9Y2T6 | C00076 |
| Q9Y2U2 | C00238 |
| Q9Y2W3 | C00293 |
| Q9Y2W3 | C11477 |
| Q9Y2W7 | C00039 |
| Q9Y2W7 | C00076 |
| Q9Y2W7 | C00238 |
| Q9Y2W7 | C00305 |
| Q9Y2Y8 | C00388 |
| Q9Y2Y8 | C02166 |
| Q9Y342 | C00238 |
| Q9Y342 | C01356 |
| Q9Y345 | C00037 |
| Q9Y345 | C00698 |
| Q9Y345 | C01330 |



|        |        |
|--------|--------|
| Q9Y375 | C00004 |
| Q9Y375 | C00399 |
| Q9Y375 | C05359 |
| Q9Y3D7 | C00012 |
| Q9Y3D7 | C13028 |
| Q9Y3E7 | C11106 |
| Q9Y3Q4 | C00215 |
| Q9Y3Q4 | C00238 |
| Q9Y3Q4 | C01330 |
| Q9Y487 | C00080 |
| Q9Y487 | C00282 |
| Q9Y4G8 | C00215 |
| Q9Y4G8 | C00242 |
| Q9Y4H2 | C00293 |
| Q9Y4H2 | C00638 |
| Q9Y597 | C00238 |
| Q9Y5I7 | C00305 |
| Q9Y5N2 | C00391 |
| Q9Y5P4 | C00195 |
| Q9Y5S1 | C00076 |
| Q9Y5S1 | C01373 |
| Q9Y5S8 | C00080 |
| Q9Y5S8 | C00215 |
| Q9Y5S8 | C00747 |
| Q9Y5S8 | C05359 |
| Q9Y5T3 | C00076 |
| Q9Y5T3 | C07222 |
| Q9Y5X9 | C00187 |
| Q9Y5Y0 | C00023 |
| Q9Y5Y0 | C00032 |
| Q9Y5Y0 | C00486 |
| Q9Y5Y9 | C01330 |
| Q9Y5Y9 | C11692 |
| Q9Y5Z9 | C00828 |
| Q9Y619 | C00077 |
| Q9Y619 | C01602 |
| Q9Y662 | C00925 |
| Q9Y663 | C00925 |
| Q9Y666 | C00238 |
| Q9Y666 | C00698 |
| Q9Y666 | C01330 |
| Q9Y691 | C00076 |
| Q9Y691 | C00238 |
| Q9Y691 | C13603 |
| Q9Y694 | C00059 |
| Q9Y694 | C00072 |
| Q9Y694 | C00468 |
| Q9Y694 | C00489 |

|        |        |
|--------|--------|
| Q9Y694 | C00584 |
| Q9Y694 | C00805 |
| Q9Y694 | C01330 |
| Q9Y694 | C04555 |
| Q9Y694 | C06570 |
| Q9Y694 | C06816 |
| Q9Y694 | C06859 |
| Q9Y694 | C07394 |
| Q9Y694 | C07649 |
| Q9Y696 | C00698 |
| Q9Y698 | C00076 |
| Q9Y698 | C00302 |
| Q9Y698 | C11033 |
| Q9Y6D5 | C00215 |
| Q9Y6D5 | C00242 |
| Q9Y6D6 | C00215 |
| Q9Y6D6 | C00242 |
| Q9Y6F6 | C00076 |
| Q9Y6F6 | C00306 |
| Q9Y6H6 | C00012 |
| Q9Y6H6 | C00238 |
| Q9Y6H6 | C00575 |
| Q9Y6H6 | C00698 |
| Q9Y6J6 | C00012 |
| Q9Y6J6 | C00238 |
| Q9Y6K0 | C00114 |
| Q9Y6K0 | C00865 |
| Q9Y6L6 | C00059 |
| Q9Y6L6 | C00403 |
| Q9Y6L6 | C00468 |
| Q9Y6L6 | C00584 |
| Q9Y6L6 | C00951 |
| Q9Y6L6 | C01330 |
| Q9Y6L6 | C01558 |
| Q9Y6L6 | C01844 |
| Q9Y6L6 | C01937 |
| Q9Y6L6 | C02465 |
| Q9Y6L6 | C04555 |
| Q9Y6L6 | C05122 |
| Q9Y6L6 | C05952 |
| Q9Y6L6 | C05963 |
| Q9Y6L6 | C08215 |
| Q9Y6M5 | C00038 |
| Q9Y6M5 | C00076 |
| Q9Y6M5 | C01413 |
| Q9Y6M7 | C00288 |
| Q9Y6M7 | C01330 |
| Q9Y6M7 | C12603 |

|        |        |
|--------|--------|
| Q9Y6M9 | C00004 |
| Q9Y6M9 | C00399 |
| Q9Y6M9 | C05359 |
| Q9Y6N3 | C00076 |
| Q9Y6N3 | C00698 |
| Q9Y6R1 | C00288 |
| Q9Y6R1 | C01330 |
| Q9Y6R1 | C12603 |

---
