# Supplementary material for: METSP: A Maximum-Entropy Classifier Based Text Mining Tool for Transporter-Substrate Identification with Semistructured Text
Source: Hindawi journal article supplement (doi:10.1155/2015/254838), 2015-01-01
Supplement: f1 [file 254838.f1.zip]

**Additional file 1 – The 6955 TSPs were manually collected from UniProt, TransportDB and TCDB.**

| <b>CompoundID_KEGG</b> | <b>UniProt_AC</b> |
|------------------------|-------------------|
| C00001                 | O14520            |
| C00001                 | O22588            |
| C00001                 | O28846            |
| C00001                 | O43315            |
| C00001                 | O54794            |
| C00001                 | O68874            |
| C00001                 | O82316            |
| C00001                 | O82598            |
| C00001                 | O94778            |
| C00001                 | P0CD90            |
| C00001                 | P0CD91            |
| C00001                 | P25818            |
| C00001                 | P26587            |
| C00001                 | P29972            |
| C00001                 | P30301            |
| C00001                 | P30302            |
| C00001                 | P41181            |
| C00001                 | P43286            |
| C00001                 | P43287            |
| C00001                 | P51180            |
| C00001                 | P55064            |
| C00001                 | P55087            |
| C00001                 | P55088            |
| C00001                 | P56402            |
| C00001                 | P60925            |
| C00001                 | P61837            |
| C00001                 | P73809            |
| C00001                 | P93004            |
| C00001                 | Q02013            |
| C00001                 | Q06611            |
| C00001                 | Q08733            |
| C00001                 | Q0DK16            |
| C00001                 | Q0IWF3            |
| C00001                 | Q0JPT5            |
| C00001                 | Q10M80            |
| C00001                 | Q13520            |
| C00001                 | Q39196            |
| C00001                 | Q40746            |
| C00001                 | Q41951            |
| C00001                 | Q41963            |
| C00001                 | Q41975            |
| C00001                 | Q5VR89            |
| C00001                 | Q5Z6F0            |
| C00001                 | Q5Z9E2            |
| C00001                 | Q651D5            |

|        |        |
|--------|--------|
| C00001 | Q67WJ8 |
| C00001 | Q6EU94 |
| C00001 | Q6K215 |
| C00001 | Q7EYH7 |
| C00001 | Q7MIV9 |
| C00001 | Q7N5C1 |
| C00001 | Q7NNP3 |
| C00001 | Q7W917 |
| C00001 | Q7WKG2 |
| C00001 | Q7XKI5 |
| C00001 | Q7XLR1 |
| C00001 | Q7XSQ9 |
| C00001 | Q7XU31 |
| C00001 | Q7XUA6 |
| C00001 | Q7Y1E6 |
| C00001 | Q84S07 |
| C00001 | Q87MQ5 |
| C00001 | Q89EG9 |
| C00001 | Q8C4A0 |
| C00001 | Q8DB17 |
| C00001 | Q8EHC1 |
| C00001 | Q8FY85 |
| C00001 | Q8GRT8 |
| C00001 | Q8H5N9 |
| C00001 | Q8LAA6 |
| C00001 | Q8LAI1 |
| C00001 | Q8LFP7 |
| C00001 | Q8R2N1 |
| C00001 | Q8SRK2 |
| C00001 | Q8VZW1 |
| C00001 | Q8W036 |
| C00001 | Q8W037 |
| C00001 | Q92482 |
| C00001 | Q92NM3 |
| C00001 | Q92ZW9 |
| C00001 | Q96PS8 |
| C00001 | Q9ASI1 |
| C00001 | Q9C6T0 |
| C00001 | Q9FF53 |
| C00001 | Q9FIZ9 |
| C00001 | Q9FK43 |
| C00001 | Q9FWV6 |
| C00001 | Q9HWZ3 |
| C00001 | Q9L772 |
| C00001 | Q9LWR0 |
| C00001 | Q9LWR2 |
| C00001 | Q9M1K3 |
| C00001 | Q9M8W5 |

|        |        |
|--------|--------|
| C00001 | Q9SAI4 |
| C00001 | Q9STX9 |
| C00001 | Q9SV31 |
| C00001 | Q9SV84 |
| C00001 | Q9SXF8 |
| C00001 | Q9V5Z7 |
| C00001 | Q9WTY4 |
| C00001 | Q9ZV07 |
| C00001 | Q9ZVX8 |
| C00002 | B0RZB7 |
| C00002 | O05962 |
| C00002 | O84068 |
| C00002 | O97470 |
| C00002 | P02723 |
| C00002 | P04710 |
| C00002 | P05141 |
| C00002 | P12235 |
| C00002 | P12236 |
| C00002 | P18238 |
| C00002 | P18239 |
| C00002 | P19568 |
| C00002 | P31167 |
| C00002 | P40941 |
| C00002 | P48962 |
| C00002 | P51881 |
| C00002 | P92935 |
| C00002 | Q09188 |
| C00002 | Q39002 |
| C00002 | Q3V132 |
| C00002 | Q8SRA2 |
| C00002 | Q8SUF9 |
| C00002 | Q8SUG0 |
| C00002 | Q8SUG7 |
| C00002 | Q92GI5 |
| C00002 | Q92HP9 |
| C00002 | Q92HV4 |
| C00002 | Q92JI6 |
| C00002 | Q9H0C2 |
| C00002 | Q9PJP6 |
| C00002 | Q9PKX5 |
| C00002 | Q9S6V3 |
| C00002 | Q9Z7U0 |
| C00002 | Q9Z8J2 |
| C00002 | Q9ZD47 |
| C00002 | Q9ZD67 |
| C00002 | Q9ZDF2 |
| C00008 | B0RZB7 |
| C00008 | O05962 |

|        |        |
|--------|--------|
| C00008 | O84068 |
| C00008 | O97470 |
| C00008 | P02723 |
| C00008 | P04710 |
| C00008 | P05141 |
| C00008 | P12235 |
| C00008 | P12236 |
| C00008 | P18238 |
| C00008 | P18239 |
| C00008 | P19568 |
| C00008 | P31167 |
| C00008 | P40941 |
| C00008 | P48962 |
| C00008 | P51881 |
| C00008 | P92935 |
| C00008 | Q09188 |
| C00008 | Q39002 |
| C00008 | Q3V132 |
| C00008 | Q8SRA2 |
| C00008 | Q8SUF9 |
| C00008 | Q8SUG0 |
| C00008 | Q8SUG7 |
| C00008 | Q92GI5 |
| C00008 | Q92HP9 |
| C00008 | Q92HV4 |
| C00008 | Q92JI6 |
| C00008 | Q9H0C2 |
| C00008 | Q9PJP6 |
| C00008 | Q9PKX5 |
| C00008 | Q9S6V3 |
| C00008 | Q9Z7U0 |
| C00008 | Q9Z8J2 |
| C00008 | Q9ZD47 |
| C00008 | Q9ZD67 |
| C00008 | Q9ZDF2 |
| C00009 | A0R4C0 |
| C00009 | O00476 |
| C00009 | O00624 |
| C00009 | O05870 |
| C00009 | O06411 |
| C00009 | O27764 |
| C00009 | O28912 |
| C00009 | O30499 |
| C00009 | O34436 |
| C00009 | O34734 |
| C00009 | O48639 |
| C00009 | O51236 |
| C00009 | O53832 |

|        |        |
|--------|--------|
| C00009 | O67154 |
| C00009 | O82390 |
| C00009 | O86345 |
| C00009 | O95436 |
| C00009 | P02932 |
| C00009 | P05695 |
| C00009 | P07654 |
| C00009 | P08194 |
| C00009 | P09836 |
| C00009 | P0A2V8 |
| C00009 | P0A5Y2 |
| C00009 | P0A5Y3 |
| C00009 | P0A626 |
| C00009 | P0A627 |
| C00009 | P0A628 |
| C00009 | P0A629 |
| C00009 | P0A630 |
| C00009 | P0A631 |
| C00009 | P0AAH0 |
| C00009 | P0AAH2 |
| C00009 | P0AAH3 |
| C00009 | P0AFJ9 |
| C00009 | P0AG82 |
| C00009 | P0AG83 |
| C00009 | P0AGC0 |
| C00009 | P0AGC1 |
| C00009 | P0AGC2 |
| C00009 | P0AGH8 |
| C00009 | P0AGH9 |
| C00009 | P0AGI0 |
| C00009 | P0C2M5 |
| C00009 | P0CAT6 |
| C00009 | P12234 |
| C00009 | P12681 |
| C00009 | P15710 |
| C00009 | P15712 |
| C00009 | P16677 |
| C00009 | P16682 |
| C00009 | P16683 |
| C00009 | P25297 |
| C00009 | P25360 |
| C00009 | P38361 |
| C00009 | P40035 |
| C00009 | P45190 |
| C00009 | P45191 |
| C00009 | P45192 |
| C00009 | P46339 |
| C00009 | P46340 |

|        |        |
|--------|--------|
| C00009 | P46341 |
| C00009 | P46342 |
| C00009 | P47650 |
| C00009 | P47651 |
| C00009 | P58655 |
| C00009 | P59950 |
| C00009 | P63361 |
| C00009 | P63362 |
| C00009 | P63363 |
| C00009 | P63364 |
| C00009 | P63365 |
| C00009 | P63366 |
| C00009 | P63367 |
| C00009 | P63368 |
| C00009 | P63369 |
| C00009 | P63370 |
| C00009 | P63371 |
| C00009 | P63372 |
| C00009 | P63373 |
| C00009 | P63375 |
| C00009 | P63378 |
| C00009 | P69879 |
| C00009 | P69881 |
| C00009 | P73788 |
| C00009 | P75185 |
| C00009 | P75186 |
| C00009 | P95302 |
| C00009 | Q00325 |
| C00009 | Q01395 |
| C00009 | Q06495 |
| C00009 | Q06496 |
| C00009 | Q08357 |
| C00009 | Q084V3 |
| C00009 | Q0A9K1 |
| C00009 | Q0ASG3 |
| C00009 | Q0BTP1 |
| C00009 | Q0C0L5 |
| C00009 | Q0IAC3 |
| C00009 | Q0IZQ3 |
| C00009 | Q0SNU4 |
| C00009 | Q0VL18 |
| C00009 | Q11NG0 |
| C00009 | Q14916 |
| C00009 | Q180A5 |
| C00009 | Q1LLB5 |
| C00009 | Q1MIN0 |
| C00009 | Q1MLW4 |
| C00009 | Q2FTF8 |

|        |        |
|--------|--------|
| C00009 | Q2KCV5 |
| C00009 | Q2LTG0 |
| C00009 | Q2QWW7 |
| C00009 | Q2RWU0 |
| C00009 | Q2SS06 |
| C00009 | Q30PC0 |
| C00009 | Q31I88 |
| C00009 | Q38954 |
| C00009 | Q3A6U0 |
| C00009 | Q3AAA4 |
| C00009 | Q3AJS9 |
| C00009 | Q3ATA4 |
| C00009 | Q3AXX4 |
| C00009 | Q3B3H7 |
| C00009 | Q3ILC5 |
| C00009 | Q3IM36 |
| C00009 | Q3IS07 |
| C00009 | Q3J8J2 |
| C00009 | Q3JDJ6 |
| C00009 | Q3SVB5 |
| C00009 | Q3ZA58 |
| C00009 | Q3ZWN4 |
| C00009 | Q43650 |
| C00009 | Q47A37 |
| C00009 | Q47Y12 |
| C00009 | Q494P0 |
| C00009 | Q4FLF6 |
| C00009 | Q4K3K9 |
| C00009 | Q50046 |
| C00009 | Q50097 |
| C00009 | Q50098 |
| C00009 | Q50173 |
| C00009 | Q51546 |
| C00009 | Q53P54 |
| C00009 | Q54BF6 |
| C00009 | Q55195 |
| C00009 | Q55196 |
| C00009 | Q57AC2 |
| C00009 | Q58418 |
| C00009 | Q58419 |
| C00009 | Q58420 |
| C00009 | Q58421 |
| C00009 | Q5FM17 |
| C00009 | Q5FM18 |
| C00009 | Q5FT15 |
| C00009 | Q5HAV5 |
| C00009 | Q5HG31 |
| C00009 | Q5HPF2 |

|        |        |
|--------|--------|
| C00009 | Q5HPF5 |
| C00009 | Q5JEP9 |
| C00009 | Q5KX47 |
| C00009 | Q5LS19 |
| C00009 | Q5LZU2 |
| C00009 | Q5LZU3 |
| C00009 | Q5N1G5 |
| C00009 | Q5NCM1 |
| C00009 | Q5NNN6 |
| C00009 | Q5P1F3 |
| C00009 | Q5QVB0 |
| C00009 | Q5SZA1 |
| C00009 | Q5V0G3 |
| C00009 | Q5V225 |
| C00009 | Q5Z293 |
| C00009 | Q609Z8 |
| C00009 | Q61609 |
| C00009 | Q61983 |
| C00009 | Q62L74 |
| C00009 | Q63V79 |
| C00009 | Q64SM5 |
| C00009 | Q652N5 |
| C00009 | Q65HB9 |
| C00009 | Q65HC0 |
| C00009 | Q662E6 |
| C00009 | Q663R5 |
| C00009 | Q668E1 |
| C00009 | Q67RE7 |
| C00009 | Q67RG2 |
| C00009 | Q69T94 |
| C00009 | Q6AAX3 |
| C00009 | Q6ADG4 |
| C00009 | Q6AM16 |
| C00009 | Q6CYN3 |
| C00009 | Q6D2D5 |
| C00009 | Q6F1N1 |
| C00009 | Q6FCW7 |
| C00009 | Q6G0L7 |
| C00009 | Q6G4T6 |
| C00009 | Q6GQS1 |
| C00009 | Q6HDP8 |
| C00009 | Q6KIS8 |
| C00009 | Q6LSC4 |
| C00009 | Q6LU82 |
| C00009 | Q6LY93 |
| C00009 | Q6MMH0 |
| C00009 | Q6MTC1 |
| C00009 | Q6N0I5 |



|        |        |
|--------|--------|
| C00009 | Q6NUK1 |
| C00009 | Q71WT2 |
| C00009 | Q71WT3 |
| C00009 | Q72D46 |
| C00009 | Q72GX5 |
| C00009 | Q743D1 |
| C00009 | Q74E68 |
| C00009 | Q74KF8 |
| C00009 | Q74KF9 |
| C00009 | Q7A5Q2 |
| C00009 | Q7M9G3 |
| C00009 | Q7MFE8 |
| C00009 | Q7MNI7 |
| C00009 | Q7N9U4 |
| C00009 | Q7NC40 |
| C00009 | Q7NNG3 |
| C00009 | Q7NPP4 |
| C00009 | Q7U0Z9 |
| C00009 | Q7U172 |
| C00009 | Q7U6R4 |
| C00009 | Q7UP21 |
| C00009 | Q7V1X3 |
| C00009 | Q7V7P0 |
| C00009 | Q7VCZ3 |
| C00009 | Q7VZ66 |
| C00009 | Q7W8Q6 |
| C00009 | Q7X7V2 |
| C00009 | Q7XDZ7 |
| C00009 | Q7XRH8 |
| C00009 | Q818I7 |
| C00009 | Q81LW6 |
| C00009 | Q82G23 |
| C00009 | Q82VR4 |
| C00009 | Q834B3 |
| C00009 | Q834B4 |
| C00009 | Q83GE8 |
| C00009 | Q83HT1 |
| C00009 | Q87C88 |
| C00009 | Q87C89 |
| C00009 | Q87C90 |
| C00009 | Q87C91 |
| C00009 | Q87G59 |
| C00009 | Q87S48 |
| C00009 | Q87U31 |
| C00009 | Q880A6 |
| C00009 | Q88C57 |
| C00009 | Q88JJ0 |
| C00009 | Q88YK7 |

|        |        |
|--------|--------|
| C00009 | Q88YK8 |
| C00009 | Q895Y0 |
| C00009 | Q89A24 |
| C00009 | Q89VF2 |
| C00009 | Q8A853 |
| C00009 | Q8BMD8 |
| C00009 | Q8CP98 |
| C00009 | Q8CPA1 |
| C00009 | Q8CVC9 |
| C00009 | Q8DGZ3 |
| C00009 | Q8DU23 |
| C00009 | Q8DU24 |
| C00009 | Q8DZV4 |
| C00009 | Q8E310 |
| C00009 | Q8E5K2 |
| C00009 | Q8E9I8 |
| C00009 | Q8EG82 |
| C00009 | Q8ELT4 |
| C00009 | Q8EUJ1 |
| C00009 | Q8FMN9 |
| C00009 | Q8G7F4 |
| C00009 | Q8GSD9 |
| C00009 | Q8GYF4 |
| C00009 | Q8H074 |
| C00009 | Q8H6G7 |
| C00009 | Q8H6G8 |
| C00009 | Q8H6G9 |
| C00009 | Q8H6H0 |
| C00009 | Q8H6H2 |
| C00009 | Q8H6H4 |
| C00009 | Q8K903 |
| C00009 | Q8KDZ5 |
| C00009 | Q8N130 |
| C00009 | Q8NMK1 |
| C00009 | Q8PM59 |
| C00009 | Q8PVF6 |
| C00009 | Q8R9I2 |
| C00009 | Q8RCU0 |
| C00009 | Q8TSA8 |
| C00009 | Q8TUR7 |
| C00009 | Q8U242 |
| C00009 | Q8UI76 |
| C00009 | Q8VEM8 |
| C00009 | Q8VYM2 |
| C00009 | Q8WUM9 |
| C00009 | Q8XMP8 |
| C00009 | Q8XZ72 |
| C00009 | Q8Y4E9 |

|        |        |
|--------|--------|
| C00009 | Q8YNJ3 |
| C00009 | Q8YYE2 |
| C00009 | Q8YYE3 |
| C00009 | Q8Z9T1 |
| C00009 | Q8ZCX5 |
| C00009 | Q8ZX91 |
| C00009 | Q927Z7 |
| C00009 | Q92SA1 |
| C00009 | Q94DB8 |
| C00009 | Q96243 |
| C00009 | Q96303 |
| C00009 | Q97IE0 |
| C00009 | Q97Q31 |
| C00009 | Q97Q34 |
| C00009 | Q97ZT9 |
| C00009 | Q98FL2 |
| C00009 | Q98FL3 |
| C00009 | Q98FL4 |
| C00009 | Q98FL5 |
| C00009 | Q9BV35 |
| C00009 | Q9CBE5 |
| C00009 | Q9CEW7 |
| C00009 | Q9CEW8 |
| C00009 | Q9CNJ4 |
| C00009 | Q9CNJ5 |
| C00009 | Q9CNJ6 |
| C00009 | Q9CNJ7 |
| C00009 | Q9DBP0 |
| C00009 | Q9HML8 |
| C00009 | Q9HS13 |
| C00009 | Q9K8L5 |
| C00009 | Q9KN92 |
| C00009 | Q9KU04 |
| C00009 | Q9KZW2 |
| C00009 | Q9PBK0 |
| C00009 | Q9PBK1 |
| C00009 | Q9PBK2 |
| C00009 | Q9PBK3 |
| C00009 | Q9PHQ1 |
| C00009 | Q9PQU3 |
| C00009 | Q9S735 |
| C00009 | Q9SDI4 |
| C00009 | Q9SYQ1 |
| C00009 | Q9UZU7 |
| C00009 | Q9V7S5 |
| C00009 | Q9X0Y8 |
| C00009 | Q9Y2C5 |
| C00009 | Q9YG51 |

|        |        |
|--------|--------|
| C00009 | Q9Z7N9 |
| C00009 | Q9ZWT3 |
| C00010 | O00400 |
| C00011 | Q02094 |
| C00011 | Q8I0L6 |
| C00011 | Q9NIV0 |
| C00012 | P08183 |
| C00012 | P0A2J3 |
| C00012 | P0A2J4 |
| C00012 | P0A2J5 |
| C00012 | P0A2J6 |
| C00012 | P0AAH6 |
| C00012 | P0AAH7 |
| C00012 | P0AAI0 |
| C00012 | P0AE16 |
| C00012 | P0AGH4 |
| C00012 | P0AGH7 |
| C00012 | P36371 |
| C00012 | P36634 |
| C00012 | P36636 |
| C00012 | P36638 |
| C00012 | P43505 |
| C00012 | P45285 |
| C00012 | P45286 |
| C00012 | P45287 |
| C00012 | P45288 |
| C00012 | P45289 |
| C00012 | Q03518 |
| C00012 | Q03519 |
| C00012 | Q0WML0 |
| C00012 | Q51006 |
| C00012 | Q51073 |
| C00012 | Q8IY34 |
| C00012 | Q8N697 |
| C00012 | Q8RY46 |
| C00012 | Q9JJ59 |
| C00012 | Q9LFB8 |
| C00012 | Q9M390 |
| C00012 | Q9NP78 |
| C00012 | Q9P380 |
| C00013 | P32977 |
| C00016 | P40464 |
| C00019 | P38921 |
| C00019 | Q08986 |
| C00019 | Q5U680 |
| C00019 | Q92JG1 |
| C00019 | Q9ZE70 |
| C00022 | P41036 |

|        |        |
|--------|--------|
| C00022 | P53985 |
| C00023 | A3ZKG8 |
| C00023 | O31567 |
| C00023 | O31568 |
| C00023 | O34348 |
| C00023 | O34510 |
| C00023 | O34832 |
| C00023 | O34933 |
| C00023 | O81850 |
| C00023 | O87656 |
| C00023 | P05825 |
| C00023 | P06971 |
| C00023 | P0A0Y4 |
| C00023 | P11461 |
| C00023 | P13036 |
| C00023 | P16869 |
| C00023 | P17315 |
| C00023 | P35755 |
| C00023 | P42512 |
| C00023 | P44513 |
| C00023 | P71338 |
| C00023 | P72827 |
| C00023 | P73182 |
| C00023 | P74884 |
| C00023 | P75780 |
| C00023 | Q0I2Z4 |
| C00023 | Q2K8C8 |
| C00023 | Q38856 |
| C00023 | Q4KC87 |
| C00023 | Q4W575 |
| C00023 | Q55835 |
| C00023 | Q578K3 |
| C00023 | Q5FA19 |
| C00023 | Q5HGV1 |
| C00023 | Q5N0R0 |
| C00023 | Q65S66 |
| C00023 | Q668Q3 |
| C00023 | Q6D2F6 |
| C00023 | Q6D734 |
| C00023 | Q6H3Z3 |
| C00023 | Q6H3Z6 |
| C00023 | Q6LKD4 |
| C00023 | Q7AH43 |
| C00023 | Q7N8B9 |
| C00023 | Q82VI7 |
| C00023 | Q8DLH9 |
| C00023 | Q8FVV5 |
| C00023 | Q8LE59 |

|        |        |
|--------|--------|
| C00023 | Q8R0Z5 |
| C00023 | Q8RGC8 |
| C00023 | Q8U6M1 |
| C00023 | Q8YCG3 |
| C00023 | Q8ZBM3 |
| C00023 | Q8ZCM2 |
| C00023 | Q8ZRP7 |
| C00023 | Q92UV5 |
| C00023 | Q92WJ0 |
| C00023 | Q98G43 |
| C00023 | Q9CM80 |
| C00023 | Q9HFE1 |
| C00023 | Q9HXB2 |
| C00023 | Q9KLQ5 |
| C00024 | O00400 |
| C00024 | Q99J27 |
| C00025 | O00341 |
| C00025 | O30417 |
| C00025 | O35544 |
| C00025 | O75746 |
| C00025 | P0AAG4 |
| C00025 | P0AER7 |
| C00025 | P0AER9 |
| C00025 | P43003 |
| C00025 | P43004 |
| C00025 | P43006 |
| C00025 | P45240 |
| C00025 | P48242 |
| C00025 | P48243 |
| C00025 | P48244 |
| C00025 | P48245 |
| C00025 | P48664 |
| C00025 | P51906 |
| C00025 | P56564 |
| C00025 | P58229 |
| C00025 | Q10901 |
| C00025 | Q3TXX4 |
| C00025 | Q8BFU8 |
| C00025 | Q8BH59 |
| C00025 | Q8BLE7 |
| C00025 | Q8JZR4 |
| C00025 | Q8NDX2 |
| C00025 | Q8RQL4 |
| C00025 | Q8RQL5 |
| C00025 | Q8RQL6 |
| C00025 | Q8RQL7 |
| C00025 | Q91WN3 |
| C00025 | Q9CG19 |

|        |        |
|--------|--------|
| C00025 | Q9D6M3 |
| C00025 | Q9DB41 |
| C00025 | Q9H1K4 |
| C00025 | Q9H936 |
| C00025 | Q9P2U7 |
| C00025 | Q9P2U8 |
| C00025 | Q9QXX4 |
| C00025 | Q9UPY5 |
| C00025 | Q9WTR6 |
| C00026 | Q02978 |
| C00026 | Q54PY7 |
| C00026 | Q9CR62 |
| C00031 | A0PJK1 |
| C00031 | O07563 |
| C00031 | O25788 |
| C00031 | O74969 |
| C00031 | P0A283 |
| C00031 | P0A284 |
| C00031 | P0C105 |
| C00031 | P10870 |
| C00031 | P11166 |
| C00031 | P11168 |
| C00031 | P11169 |
| C00031 | P13181 |
| C00031 | P13866 |
| C00031 | P14142 |
| C00031 | P14246 |
| C00031 | P14672 |
| C00031 | P15729 |
| C00031 | P17809 |
| C00031 | P22732 |
| C00031 | P23586 |
| C00031 | P31639 |
| C00031 | P32037 |
| C00031 | P37439 |
| C00031 | P39816 |
| C00031 | P39924 |
| C00031 | P42833 |
| C00031 | P45338 |
| C00031 | P45618 |
| C00031 | P47315 |
| C00031 | P53403 |
| C00031 | P54862 |
| C00031 | P60857 |
| C00031 | P60944 |
| C00031 | P69785 |
| C00031 | P69788 |
| C00031 | P75569 |

|        |        |
|--------|--------|
| C00031 | P78831 |
| C00031 | Q05BQ3 |
| C00031 | Q12300 |
| C00031 | Q2M3M2 |
| C00031 | Q44840 |
| C00031 | Q5HD13 |
| C00031 | Q5HFZ9 |
| C00031 | Q5HJI3 |
| C00031 | Q5HL73 |
| C00031 | Q5HLZ2 |
| C00031 | Q5HPB5 |
| C00031 | Q5SWY8 |
| C00031 | Q5TF39 |
| C00031 | Q6PXP3 |
| C00031 | Q7A3G4 |
| C00031 | Q7A807 |
| C00031 | Q7CCJ4 |
| C00031 | Q814U8 |
| C00031 | Q816V0 |
| C00031 | Q81JY0 |
| C00031 | Q81KM7 |
| C00031 | Q89AG6 |
| C00031 | Q89B05 |
| C00031 | Q8BFW9 |
| C00031 | Q8C3K6 |
| C00031 | Q8CNF2 |
| C00031 | Q8CP79 |
| C00031 | Q8CZD5 |
| C00031 | Q8IRI6 |
| C00031 | Q8K0E3 |
| C00031 | Q8K9J0 |
| C00031 | Q8KA51 |
| C00031 | Q8TDB8 |
| C00031 | Q8VCV9 |
| C00031 | Q8VDT1 |
| C00031 | Q8VHD6 |
| C00031 | Q8WWX8 |
| C00031 | Q92253 |
| C00031 | Q923I7 |
| C00031 | Q94AZ2 |
| C00031 | Q9BYW1 |
| C00031 | Q9JIF3 |
| C00031 | Q9KCQ4 |
| C00031 | Q9NRM0 |
| C00031 | Q9NY64 |
| C00031 | Q9NY91 |
| C00031 | Q9P3U6 |
| C00031 | Q9UGQ3 |



|        |        |
|--------|--------|
| C00032 | P0ABM0 |
| C00032 | P0ABM3 |
| C00032 | P0ABM4 |
| C00032 | P30962 |
| C00032 | P30963 |
| C00032 | P30964 |
| C00032 | P31499 |
| C00032 | P45032 |
| C00032 | P45033 |
| C00032 | P45034 |
| C00032 | P45356 |
| C00032 | P61377 |
| C00032 | P61378 |
| C00032 | Q089M3 |
| C00032 | Q0A808 |
| C00032 | Q0AKQ2 |
| C00032 | Q0BV49 |
| C00032 | Q0BWF7 |
| C00032 | Q0I2G0 |
| C00032 | Q0VR80 |
| C00032 | Q1LFZ8 |
| C00032 | Q1LKR4 |
| C00032 | Q1MAL7 |
| C00032 | Q2K396 |
| C00032 | Q2NSG3 |
| C00032 | Q2RYF0 |
| C00032 | Q3JCI7 |
| C00032 | Q3SVV2 |
| C00032 | Q478L3 |
| C00032 | Q487I2 |
| C00032 | Q4KG27 |
| C00032 | Q56991 |
| C00032 | Q56992 |
| C00032 | Q56993 |
| C00032 | Q57FS7 |
| C00032 | Q5FQN4 |
| C00032 | Q5LR15 |
| C00032 | Q5NQX0 |
| C00032 | Q5P3L0 |
| C00032 | Q5PBP5 |
| C00032 | Q5QZP7 |
| C00032 | Q5ZX76 |
| C00032 | Q60AB3 |
| C00032 | Q65V02 |
| C00032 | Q668T8 |
| C00032 | Q6D606 |
| C00032 | Q6G0V9 |
| C00032 | Q6G529 |

|        |        |
|--------|--------|
| C00032 | Q6LTL7 |
| C00032 | Q6NDA6 |
| C00032 | Q6PEM8 |
| C00032 | Q73HX8 |
| C00032 | Q7MIR0 |
| C00032 | Q7VN12 |
| C00032 | Q7W736 |
| C00032 | Q7WIP8 |
| C00032 | Q82WC8 |
| C00032 | Q83KD5 |
| C00032 | Q83QV3 |
| C00032 | Q87BH8 |
| C00032 | Q87MK8 |
| C00032 | Q87Z03 |
| C00032 | Q88EX5 |
| C00032 | Q8EK40 |
| C00032 | Q8G358 |
| C00032 | Q8PK53 |
| C00032 | Q8UC12 |
| C00032 | Q8XE58 |
| C00032 | Q8ZD58 |
| C00032 | Q8ZKZ9 |
| C00032 | Q92G95 |
| C00032 | Q98EA4 |
| C00032 | Q9A298 |
| C00032 | Q9C8T1 |
| C00032 | Q9CPN2 |
| C00032 | Q9I3N5 |
| C00032 | Q9I3N6 |
| C00032 | Q9I3N7 |
| C00032 | Q9KQE3 |
| C00032 | Q9PAP0 |
| C00032 | Q9ZCF9 |
| C00034 | A0KG66 |
| C00034 | A1IQK4 |
| C00034 | A1IQK5 |
| C00034 | A6TC38 |
| C00034 | B5XVU3 |
| C00034 | O34610 |
| C00034 | O34946 |
| C00034 | O34966 |
| C00034 | O69443 |
| C00034 | P0A4G2 |
| C00034 | P0A771 |
| C00034 | P13586 |
| C00034 | P38778 |
| C00034 | P38925 |
| C00034 | P65544 |

|        |        |
|--------|--------|
| C00034 | P65545 |
| C00034 | P96593 |
| C00034 | P98194 |
| C00034 | Q03D26 |
| C00034 | Q03DK0 |
| C00034 | Q03TH5 |
| C00034 | Q0BW85 |
| C00034 | Q10177 |
| C00034 | Q12067 |
| C00034 | Q492G8 |
| C00034 | Q50103 |
| C00034 | Q55280 |
| C00034 | Q55281 |
| C00034 | Q55282 |
| C00034 | Q553K4 |
| C00034 | Q5FA63 |
| C00034 | Q5HGX9 |
| C00034 | Q5HQ64 |
| C00034 | Q668N2 |
| C00034 | Q71ZP6 |
| C00034 | Q80XR2 |
| C00034 | Q87EJ9 |
| C00034 | Q89K67 |
| C00034 | Q8CPM6 |
| C00034 | Q8GH68 |
| C00034 | Q8PKX1 |
| C00034 | Q8R7S2 |
| C00034 | Q8UEM1 |
| C00034 | Q8XSF6 |
| C00034 | Q8Y651 |
| C00034 | Q8Y652 |
| C00034 | Q8Y653 |
| C00034 | Q8Y773 |
| C00034 | Q8Z4X5 |
| C00034 | Q8ZCK2 |
| C00034 | Q8ZSB0 |
| C00034 | Q92BT1 |
| C00034 | Q97TN5 |
| C00034 | Q98I99 |
| C00034 | Q99385 |
| C00034 | Q99UZ7 |
| C00034 | Q9CFZ5 |
| C00034 | Q9KD29 |
| C00034 | Q9KD30 |
| C00034 | Q9KFG3 |
| C00034 | Q9KIJ3 |
| C00034 | Q9PEL3 |
| C00034 | Q9RPF2 |

|        |        |
|--------|--------|
| C00034 | Q9RPF3 |
| C00034 | Q9RPF4 |
| C00034 | Q9RTP8 |
| C00036 | P32089 |
| C00036 | P32332 |
| C00036 | Q55BF4 |
| C00036 | Q63965 |
| C00036 | Q9UTN1 |
| C00037 | O35633 |
| C00037 | P0AAE1 |
| C00037 | P28571 |
| C00037 | P48067 |
| C00037 | Q9H598 |
| C00037 | Q9Y345 |
| C00038 | A0KPH6 |
| C00038 | A1WXT0 |
| C00038 | A4SE48 |
| C00038 | O04089 |
| C00038 | O05703 |
| C00038 | O13918 |
| C00038 | O14863 |
| C00038 | O23039 |
| C00038 | O32219 |
| C00038 | O33704 |
| C00038 | O64738 |
| C00038 | O81123 |
| C00038 | O81850 |
| C00038 | O82643 |
| C00038 | O85143 |
| C00038 | O94639 |
| C00038 | P0A2U6 |
| C00038 | P0A4G4 |
| C00038 | P0A9X1 |
| C00038 | P0A9X3 |
| C00038 | P13511 |
| C00038 | P13512 |
| C00038 | P20021 |
| C00038 | P20107 |
| C00038 | P32798 |
| C00038 | P32804 |
| C00038 | P37617 |
| C00038 | P39172 |
| C00038 | P39832 |
| C00038 | P42360 |
| C00038 | P42361 |
| C00038 | P42364 |
| C00038 | P44526 |
| C00038 | P44691 |

|        |        |
|--------|--------|
| C00038 | P44692 |
| C00038 | P97441 |
| C00038 | Q02DK9 |
| C00038 | Q0A9E2 |
| C00038 | Q0I4A9 |
| C00038 | Q0VTB6 |
| C00038 | Q12436 |
| C00038 | Q13433 |
| C00038 | Q15043 |
| C00038 | Q1MEG2 |
| C00038 | Q2GFZ6 |
| C00038 | Q2GJA5 |
| C00038 | Q2K6Q4 |
| C00038 | Q2NTI7 |
| C00038 | Q31125 |
| C00038 | Q31I51 |
| C00038 | Q38856 |
| C00038 | Q3UVU3 |
| C00038 | Q3YSK9 |
| C00038 | Q4KKK4 |
| C00038 | Q504Y0 |
| C00038 | Q576K0 |
| C00038 | Q576K1 |
| C00038 | Q5GRS1 |
| C00038 | Q5HBR8 |
| C00038 | Q5LUR8 |
| C00038 | Q5PB72 |
| C00038 | Q60738 |
| C00038 | Q62720 |
| C00038 | Q62941 |
| C00038 | Q65UG3 |
| C00038 | Q66D85 |
| C00038 | Q6D4A8 |
| C00038 | Q6D7E5 |
| C00038 | Q6DBM8 |
| C00038 | Q6FFL0 |
| C00038 | Q6LTB1 |
| C00038 | Q6NXT4 |
| C00038 | Q6P5F6 |
| C00038 | Q6P5W5 |
| C00038 | Q6PML9 |
| C00038 | Q6XR72 |
| C00038 | Q6ZMH5 |
| C00038 | Q73GK9 |
| C00038 | Q75N73 |
| C00038 | Q78IQ7 |
| C00038 | Q7MMN0 |
| C00038 | Q7N545 |

|        |        |
|--------|--------|
| C00038 | Q7VLS9 |
| C00038 | Q83KR7 |
| C00038 | Q83SA2 |
| C00038 | Q87RE5 |
| C00038 | Q87UN0 |
| C00038 | Q88CP1 |
| C00038 | Q88RL1 |
| C00038 | Q88RT8 |
| C00038 | Q89AJ0 |
| C00038 | Q89AJ1 |
| C00038 | Q8BGG0 |
| C00038 | Q8BJM5 |
| C00038 | Q8BWY7 |
| C00038 | Q8BZH0 |
| C00038 | Q8C145 |
| C00038 | Q8DFQ4 |
| C00038 | Q8FUU5 |
| C00038 | Q8FUU6 |
| C00038 | Q8IWU4 |
| C00038 | Q8K9M5 |
| C00038 | Q8K9M6 |
| C00038 | Q8K9M7 |
| C00038 | Q8LE59 |
| C00038 | Q8N1S5 |
| C00038 | Q8NEW0 |
| C00038 | Q8R4H9 |
| C00038 | Q8S3W4 |
| C00038 | Q8TAD4 |
| C00038 | Q8TJZ4 |
| C00038 | Q8UF79 |
| C00038 | Q8W245 |
| C00038 | Q8W246 |
| C00038 | Q8X400 |
| C00038 | Q8YDJ7 |
| C00038 | Q8YDJ8 |
| C00038 | Q8Z5W6 |
| C00038 | Q8Z784 |
| C00038 | Q8Z8B6 |
| C00038 | Q8ZEU2 |
| C00038 | Q8ZGY6 |
| C00038 | Q8ZNV7 |
| C00038 | Q8ZS90 |
| C00038 | Q91W10 |
| C00038 | Q92504 |
| C00038 | Q926D8 |
| C00038 | Q92G36 |
| C00038 | Q92P76 |
| C00038 | Q92T56 |

|        |        |
|--------|--------|
| C00038 | Q94EG9 |
| C00038 | Q96H72 |
| C00038 | Q99726 |
| C00038 | Q99K24 |
| C00038 | Q9A0L9 |
| C00038 | Q9BRI3 |
| C00038 | Q9BRY0 |
| C00038 | Q9C0K1 |
| C00038 | Q9CP24 |
| C00038 | Q9D856 |
| C00038 | Q9FIS2 |
| C00038 | Q9HT73 |
| C00038 | Q9I147 |
| C00038 | Q9JKN1 |
| C00038 | Q9KQB8 |
| C00038 | Q9LTH9 |
| C00038 | Q9LXS1 |
| C00038 | Q9M271 |
| C00038 | Q9NP94 |
| C00038 | Q9NUM3 |
| C00038 | Q9NY26 |
| C00038 | Q9RNI8 |
| C00038 | Q9RNI9 |
| C00038 | Q9RPX0 |
| C00038 | Q9SLG3 |
| C00038 | Q9ULF5 |
| C00038 | Q9XDA6 |
| C00038 | Q9Y6M5 |
| C00038 | Q9ZCC4 |
| C00042 | P0AE75 |
| C00042 | P33303 |
| C00042 | Q83JJ9 |
| C00042 | Q8XBK4 |
| C00043 | O74750 |
| C00043 | Q869W7 |
| C00043 | Q8CIA5 |
| C00043 | Q8R1T4 |
| C00043 | Q969S0 |
| C00043 | Q9Y2D2 |
| C00050 | P37974 |
| C00050 | P49279 |
| C00050 | P49281 |
| C00050 | Q03218 |
| C00050 | Q08970 |
| C00050 | Q869V1 |
| C00050 | Q9C6B2 |
| C00050 | Q9FN18 |
| C00050 | Q9S9N8 |

|        |        |
|--------|--------|
| C00050 | Q9SAH8 |
| C00050 | Q9SN36 |
| C00050 | Q9SNV9 |
| C00051 | A0ECD9 |
| C00051 | A8I268 |
| C00051 | O15440 |
| C00051 | O88269 |
| C00051 | O95255 |
| C00051 | P14772 |
| C00051 | P32386 |
| C00051 | P39109 |
| C00051 | Q10185 |
| C00051 | Q6J0P5 |
| C00051 | Q7DM58 |
| C00051 | Q7GB25 |
| C00051 | Q92887 |
| C00051 | Q96J66 |
| C00051 | Q9C8G9 |
| C00051 | Q9LK64 |
| C00052 | P78381 |
| C00052 | P78383 |
| C00052 | P87041 |
| C00052 | P97858 |
| C00058 | P0AC23 |
| C00058 | P0AC25 |
| C00058 | P35839 |
| C00058 | P43756 |
| C00058 | Q51330 |
| C00059 | O04289 |
| C00059 | O04722 |
| C00059 | O06984 |
| C00059 | P02906 |
| C00059 | P08690 |
| C00059 | P0A4W2 |
| C00059 | P0A4W3 |
| C00059 | P0AB93 |
| C00059 | P0AEB0 |
| C00059 | P0AFR3 |
| C00059 | P0AG78 |
| C00059 | P0AG79 |
| C00059 | P14788 |
| C00059 | P16676 |
| C00059 | P16700 |
| C00059 | P16701 |
| C00059 | P23622 |
| C00059 | P32332 |
| C00059 | P38359 |
| C00059 | P40860 |



|        |        |
|--------|--------|
| C00059 | P41031 |
| C00059 | P41032 |
| C00059 | P50443 |
| C00059 | P58735 |
| C00059 | P63353 |
| C00059 | P63354 |
| C00059 | P74547 |
| C00059 | P74548 |
| C00059 | P92946 |
| C00059 | Q01895 |
| C00059 | Q01903 |
| C00059 | Q07782 |
| C00059 | Q12325 |
| C00059 | Q55027 |
| C00059 | Q5YZY9 |
| C00059 | Q609Q1 |
| C00059 | Q62273 |
| C00059 | Q62K82 |
| C00059 | Q63TY1 |
| C00059 | Q65T42 |
| C00059 | Q668K6 |
| C00059 | Q6D201 |
| C00059 | Q6F9A8 |
| C00059 | Q6NBT1 |
| C00059 | Q73XU8 |
| C00059 | Q7N6Z2 |
| C00059 | Q7NIW1 |
| C00059 | Q7VZE5 |
| C00059 | Q7W9U5 |
| C00059 | Q7WGW1 |
| C00059 | Q80ZD3 |
| C00059 | Q81GU1 |
| C00059 | Q82WT5 |
| C00059 | Q86WA9 |
| C00059 | Q87DT9 |
| C00059 | Q88AS5 |
| C00059 | Q88CL2 |
| C00059 | Q89UD2 |
| C00059 | Q8D0W8 |
| C00059 | Q8E8K8 |
| C00059 | Q8F6Z1 |
| C00059 | Q8GYH8 |
| C00059 | Q8PNN4 |
| C00059 | Q8R2Z3 |
| C00059 | Q8TE54 |
| C00059 | Q8UA73 |
| C00059 | Q8UH62 |
| C00059 | Q8XZP8 |

|        |        |
|--------|--------|
| C00059 | Q8Z0H0 |
| C00059 | Q92VJ2 |
| C00059 | Q92XW1 |
| C00059 | Q94225 |
| C00059 | Q94LW6 |
| C00059 | Q98K23 |
| C00059 | Q9A7X1 |
| C00059 | Q9BZW2 |
| C00059 | Q9FEP7 |
| C00059 | Q9FY46 |
| C00059 | Q9H2B4 |
| C00059 | Q9I6L0 |
| C00059 | Q9JZW0 |
| C00059 | Q9K876 |
| C00059 | Q9KUI0 |
| C00059 | Q9LW86 |
| C00059 | Q9MAX3 |
| C00059 | Q9PDN2 |
| C00059 | Q9SAY1 |
| C00059 | Q9SV13 |
| C00059 | Q9SXS2 |
| C00059 | Q9UKG4 |
| C00060 | O15374 |
| C00060 | O15375 |
| C00060 | O15403 |
| C00060 | O15427 |
| C00060 | O35308 |
| C00060 | O70324 |
| C00060 | O70451 |
| C00060 | O95907 |
| C00060 | P36021 |
| C00060 | P53985 |
| C00060 | P53986 |
| C00060 | P57787 |
| C00060 | Q5NC32 |
| C00060 | Q6ZSM3 |
| C00060 | Q7RTX9 |
| C00060 | Q7RTY0 |
| C00060 | Q7RTY1 |
| C00060 | Q7TM99 |
| C00060 | Q8BGC3 |
| C00060 | Q8CE94 |
| C00060 | Q8K1C7 |
| C00060 | Q8NCK7 |
| C00060 | Q8TF71 |
| C00065 | A6TAU9 |
| C00065 | A6TEC8 |
| C00065 | A7I2B9 |

|        |        |
|--------|--------|
| C00065 | B5XTX0 |
| C00065 | B5XVZ7 |
| C00065 | P0AAD7 |
| C00065 | P0AAD9 |
| C00065 | P44615 |
| C00065 | Q02LI9 |
| C00065 | Q07ZL7 |
| C00065 | Q0I455 |
| C00065 | Q0WJ82 |
| C00065 | Q5F5G9 |
| C00065 | Q5M1F4 |
| C00065 | Q83Q28 |
| C00065 | Q83QD0 |
| C00065 | Q8ZLW1 |
| C00070 | B1L487 |
| C00070 | O15431 |
| C00070 | O15432 |
| C00070 | O30085 |
| C00070 | O32220 |
| C00070 | O59666 |
| C00070 | O67203 |
| C00070 | O67432 |
| C00070 | O94722 |
| C00070 | P05425 |
| C00070 | P07893 |
| C00070 | P31845 |
| C00070 | P32113 |
| C00070 | P35670 |
| C00070 | P38360 |
| C00070 | P38865 |
| C00070 | P38995 |
| C00070 | P40866 |
| C00070 | P40867 |
| C00070 | P40868 |
| C00070 | P40869 |
| C00070 | P40870 |
| C00070 | P49573 |
| C00070 | P55989 |
| C00070 | P58341 |
| C00070 | P58342 |
| C00070 | Q04656 |
| C00070 | Q06686 |
| C00070 | Q39065 |
| C00070 | Q3L890 |
| C00070 | Q3MNJ6 |
| C00070 | Q5HCZ3 |
| C00070 | Q5HKB0 |
| C00070 | Q5HL56 |

|        |        |
|--------|--------|
| C00070 | Q72N56 |
| C00070 | Q7A3E6 |
| C00070 | Q7Y051 |
| C00070 | Q8CN02 |
| C00070 | Q8CQF7 |
| C00070 | Q8K211 |
| C00070 | Q8VPE6 |
| C00070 | Q8XD24 |
| C00070 | Q8Z8S4 |
| C00070 | Q8ZCA7 |
| C00070 | Q8ZR95 |
| C00070 | Q8ZRG7 |
| C00070 | Q8ZUJ0 |
| C00070 | Q978Z8 |
| C00070 | Q97UU7 |
| C00070 | Q97VH4 |
| C00070 | Q9CPU9 |
| C00070 | Q9HYL1 |
| C00070 | Q9KPZ7 |
| C00070 | Q9P7F9 |
| C00070 | Q9S7J8 |
| C00070 | Q9SH30 |
| C00070 | Q9SZC9 |
| C00070 | Q9USV7 |
| C00070 | Q9YBZ6 |
| C00072 | Q9EPR4 |
| C00072 | Q9UGH3 |
| C00072 | Q9UHI7 |
| C00072 | Q9WTW7 |
| C00072 | Q9Z2J0 |
| C00073 | Q26096 |
| C00073 | P38734 |
| C00073 | P44785 |
| C00073 | P50276 |
| C00073 | P63356 |
| C00073 | Q02DK6 |
| C00073 | Q02ME3 |
| C00073 | Q032A0 |
| C00073 | Q03A07 |
| C00073 | Q03P57 |
| C00073 | Q03Z27 |
| C00073 | Q043Y8 |
| C00073 | Q04B25 |
| C00073 | Q04DA7 |
| C00073 | Q04F14 |
| C00073 | Q0AU85 |
| C00073 | Q0I5E9 |
| C00073 | Q0KDG3 |

|        |        |
|--------|--------|
| C00073 | Q18C09 |
| C00073 | Q1LQF6 |
| C00073 | Q1M8E0 |
| C00073 | Q2K284 |
| C00073 | Q2NRN5 |
| C00073 | Q2RWA3 |
| C00073 | Q3A9G5 |
| C00073 | Q4KBU0 |
| C00073 | Q4KK46 |
| C00073 | Q4KKK8 |
| C00073 | Q579H8 |
| C00073 | Q5FKL2 |
| C00073 | Q5HHK4 |
| C00073 | Q5HIL5 |
| C00073 | Q5HQQ9 |
| C00073 | Q5HRU5 |
| C00073 | Q5KVK2 |
| C00073 | Q5L5Z1 |
| C00073 | Q5M1F6 |
| C00073 | Q5NFU5 |
| C00073 | Q5YRD1 |
| C00073 | Q5ZUG5 |
| C00073 | Q62B84 |
| C00073 | Q62M41 |
| C00073 | Q63NI4 |
| C00073 | Q63S19 |
| C00073 | Q65M34 |
| C00073 | Q65VG9 |
| C00073 | Q667L9 |
| C00073 | Q66CQ3 |
| C00073 | Q67SV5 |
| C00073 | Q6A6X6 |
| C00073 | Q6AE21 |
| C00073 | Q6D1C4 |
| C00073 | Q6D3Q6 |
| C00073 | Q6D5H7 |
| C00073 | Q6F9P2 |
| C00073 | Q6FAN3 |
| C00073 | Q6G2E2 |
| C00073 | Q6HBS0 |
| C00073 | Q6HP89 |
| C00073 | Q6LN52 |
| C00073 | Q6ME20 |
| C00073 | Q6N798 |
| C00073 | Q6N9W0 |
| C00073 | Q6NJ07 |
| C00073 | Q724C0 |
| C00073 | Q74IV9 |

|        |        |
|--------|--------|
| C00073 | Q7A6M2 |
| C00073 | Q7A7E3 |
| C00073 | Q7CHF8 |
| C00073 | Q7M816 |
| C00073 | Q7MN25 |
| C00073 | Q7N8M2 |
| C00073 | Q7VI92 |
| C00073 | Q7VM95 |
| C00073 | Q7VV72 |
| C00073 | Q7W4E1 |
| C00073 | Q7WFU9 |
| C00073 | Q815Y7 |
| C00073 | Q81IN8 |
| C00073 | Q81IZ6 |
| C00073 | Q81VM2 |
| C00073 | Q81XL3 |
| C00073 | Q81ZF5 |
| C00073 | Q823C4 |
| C00073 | Q827Y0 |
| C00073 | Q832Y6 |
| C00073 | Q83MC5 |
| C00073 | Q87AL9 |
| C00073 | Q87RS1 |
| C00073 | Q87UN4 |
| C00073 | Q87UV4 |
| C00073 | Q88RB3 |
| C00073 | Q88RL5 |
| C00073 | Q88UV2 |
| C00073 | Q88WA5 |
| C00073 | Q895C4 |
| C00073 | Q89LP2 |
| C00073 | Q8CQS7 |
| C00073 | Q8CTB2 |
| C00073 | Q8DFC3 |
| C00073 | Q8DY54 |
| C00073 | Q8E3S0 |
| C00073 | Q8ELA5 |
| C00073 | Q8ELQ6 |
| C00073 | Q8ENU2 |
| C00073 | Q8EPK1 |
| C00073 | Q8FRX8 |
| C00073 | Q8G5P8 |
| C00073 | Q8NSN2 |
| C00073 | Q8PGE8 |
| C00073 | Q8RFN2 |
| C00073 | Q8U7G2 |
| C00073 | Q8Y4L8 |
| C00073 | Q8YA75 |

|        |        |
|--------|--------|
| C00073 | Q8Z8R5 |
| C00073 | Q8Z990 |
| C00073 | Q8ZH38 |
| C00073 | Q92EZ6 |
| C00073 | Q93DA2 |
| C00073 | Q97KD5 |
| C00073 | Q9A502 |
| C00073 | Q9HT70 |
| C00073 | Q9I1C8 |
| C00073 | Q9K789 |
| C00073 | Q9L1C3 |
| C00073 | Q9Z8Q8 |
| C00074 | P12681 |
| C00076 | A6URW9 |
| C00076 | A9BJX0 |
| C00076 | O14983 |
| C00076 | O22218 |
| C00076 | O23087 |
| C00076 | O45215 |
| C00076 | O55017 |
| C00076 | O55143 |
| C00076 | O59768 |
| C00076 | O59868 |
| C00076 | O60721 |
| C00076 | O60840 |
| C00076 | O64806 |
| C00076 | O66938 |
| C00076 | O75185 |
| C00076 | O81108 |
| C00076 | O94759 |
| C00076 | O95180 |
| C00076 | P11881 |
| C00076 | P13586 |
| C00076 | P16615 |
| C00076 | P20020 |
| C00076 | P21817 |
| C00076 | P22189 |
| C00076 | P22700 |
| C00076 | P23634 |
| C00076 | P34315 |
| C00076 | P34322 |
| C00076 | P38929 |
| C00076 | P41821 |
| C00076 | P48995 |
| C00076 | P50077 |
| C00076 | P54678 |
| C00076 | P57103 |
| C00076 | P70227 |

|        |        |
|--------|--------|
| C00076 | P70414 |
| C00076 | P91645 |
| C00076 | P92939 |
| C00076 | P97445 |
| C00076 | P98194 |
| C00076 | Q00975 |
| C00076 | Q01668 |
| C00076 | Q01814 |
| C00076 | Q13698 |
| C00076 | Q14571 |
| C00076 | Q14573 |
| C00076 | Q14643 |
| C00076 | Q15413 |
| C00076 | Q15878 |
| C00076 | Q16720 |
| C00076 | Q19QZ8 |
| C00076 | Q19QZ9 |
| C00076 | Q19R02 |
| C00076 | Q19R03 |
| C00076 | Q19R08 |
| C00076 | Q19R11 |
| C00076 | Q19R12 |
| C00076 | Q19R13 |
| C00076 | Q19R17 |
| C00076 | Q24270 |
| C00076 | Q2TAC4 |
| C00076 | Q37145 |
| C00076 | Q39253 |
| C00076 | Q39254 |
| C00076 | Q3KR50 |
| C00076 | Q3SWS6 |
| C00076 | Q4LE63 |
| C00076 | Q5KQN0 |
| C00076 | Q5KTQ9 |
| C00076 | Q5M0A4 |
| C00076 | Q5QM84 |
| C00076 | Q5TKG3 |
| C00076 | Q61056 |
| C00076 | Q64518 |
| C00076 | Q6J4K2 |
| C00076 | Q6K1C4 |
| C00076 | Q71RS6 |
| C00076 | Q769E5 |
| C00076 | Q80XR2 |
| C00076 | Q8BWC0 |
| C00076 | Q8BWG9 |
| C00076 | Q8C261 |
| C00076 | Q8CGQ8 |



|        |        |
|--------|--------|
| C00076 | Q8L783 |
| C00076 | Q8NFF2 |
| C00076 | Q8R429 |
| C00076 | Q925Q3 |
| C00076 | Q92736 |
| C00076 | Q93Z81 |
| C00076 | Q945S5 |
| C00076 | Q94KI8 |
| C00076 | Q96D31 |
| C00076 | Q97JK5 |
| C00076 | Q99246 |
| C00076 | Q99385 |
| C00076 | Q9EQJ0 |
| C00076 | Q9H1D0 |
| C00076 | Q9HC58 |
| C00076 | Q9LF79 |
| C00076 | Q9LFZ8 |
| C00076 | Q9LIK7 |
| C00076 | Q9LJI2 |
| C00076 | Q9LU41 |
| C00076 | Q9LY77 |
| C00076 | Q9M2L4 |
| C00076 | Q9N694 |
| C00076 | Q9NQA5 |
| C00076 | Q9QX29 |
| C00076 | Q9R0K7 |
| C00076 | Q9R244 |
| C00076 | Q9SY55 |
| C00076 | Q9SYG9 |
| C00076 | Q9SZR1 |
| C00076 | Q9U6A0 |
| C00076 | Q9UBN4 |
| C00076 | Q9UI40 |
| C00076 | Q9UL62 |
| C00076 | Q9UPR5 |
| C00076 | Q9XES1 |
| C00076 | Q9XTG4 |
| C00076 | Q9Z329 |
| C00078 | P0AAD3 |
| C00078 | P38085 |
| C00078 | P38967 |
| C00078 | P44614 |
| C00078 | Q8XB33 |
| C00080 | A0L3E7 |
| C00080 | D3DN75 |
| C00080 | D3DSQ5 |
| C00080 | O02713 |
| C00080 | O07837 |

|        |        |
|--------|--------|
| C00080 | O07838 |
| C00080 | O22920 |
| C00080 | O27598 |
| C00080 | O27599 |
| C00080 | O27600 |
| C00080 | O27601 |
| C00080 | O30417 |
| C00080 | O30510 |
| C00080 | O30513 |
| C00080 | O31137 |
| C00080 | O31199 |
| C00080 | O32715 |
| C00080 | O32859 |
| C00080 | O35956 |
| C00080 | O50471 |
| C00080 | O52557 |
| C00080 | O52717 |
| C00080 | O52718 |
| C00080 | O60931 |
| C00080 | O66163 |
| C00080 | O68441 |
| C00080 | O76082 |
| C00080 | O76729 |
| C00080 | O82855 |
| C00080 | O87880 |
| C00080 | O88750 |
| C00080 | P00830 |
| C00080 | P00854 |
| C00080 | P00856 |
| C00080 | P02945 |
| C00080 | P02982 |
| C00080 | P02983 |
| C00080 | P04817 |
| C00080 | P04997 |
| C00080 | P05316 |
| C00080 | P05626 |
| C00080 | P07038 |
| C00080 | P07251 |
| C00080 | P07775 |
| C00080 | P08194 |
| C00080 | P09192 |
| C00080 | P09193 |
| C00080 | P09457 |
| C00080 | P09836 |
| C00080 | P0A0J7 |
| C00080 | P0A0J9 |
| C00080 | P0A6E6 |
| C00080 | P0AA78 |

|        |        |
|--------|--------|
| C00080 | P0AA82 |
| C00080 | P0AAD2 |
| C00080 | P0AAD4 |
| C00080 | P0AAD6 |
| C00080 | P0AAD8 |
| C00080 | P0AAE0 |
| C00080 | P0AB98 |
| C00080 | P0ABA0 |
| C00080 | P0ABA4 |
| C00080 | P0ABA6 |
| C00080 | P0ABB0 |
| C00080 | P0ABB4 |
| C00080 | P0ABC9 |
| C00080 | P0ABP3 |
| C00080 | P0AC26 |
| C00080 | P0AE16 |
| C00080 | P0AEJ0 |
| C00080 | P0AFA7 |
| C00080 | P0AFC3 |
| C00080 | P0AFC7 |
| C00080 | P0AFD1 |
| C00080 | P0AFD4 |
| C00080 | P0AFD6 |
| C00080 | P0AFE0 |
| C00080 | P0AFE4 |
| C00080 | P0AFE8 |
| C00080 | P0AFF0 |
| C00080 | P0AFF2 |
| C00080 | P0AFF4 |
| C00080 | P0AG34 |
| C00080 | P0AG38 |
| C00080 | P0AG90 |
| C00080 | P0AGM7 |
| C00080 | P0C0L7 |
| C00080 | P0C105 |
| C00080 | P10861 |
| C00080 | P11004 |
| C00080 | P11005 |
| C00080 | P11551 |
| C00080 | P12012 |
| C00080 | P12681 |
| C00080 | P13511 |
| C00080 | P13738 |
| C00080 | P14285 |
| C00080 | P15365 |
| C00080 | P15380 |
| C00080 | P15685 |
| C00080 | P15686 |

|        |        |
|--------|--------|
| C00080 | P15701 |
| C00080 | P15993 |
| C00080 | P16033 |
| C00080 | P16482 |
| C00080 | P17064 |
| C00080 | P17551 |
| C00080 | P17583 |
| C00080 | P18581 |
| C00080 | P19072 |
| C00080 | P19145 |
| C00080 | P20648 |
| C00080 | P21306 |
| C00080 | P21345 |
| C00080 | P22732 |
| C00080 | P23173 |
| C00080 | P23910 |
| C00080 | P24942 |
| C00080 | P24943 |
| C00080 | P25185 |
| C00080 | P25297 |
| C00080 | P25360 |
| C00080 | P25376 |
| C00080 | P25527 |
| C00080 | P25714 |
| C00080 | P26235 |
| C00080 | P27589 |
| C00080 | P27611 |
| C00080 | P28873 |
| C00080 | P30145 |
| C00080 | P30902 |
| C00080 | P31122 |
| C00080 | P31224 |
| C00080 | P31414 |
| C00080 | P31442 |
| C00080 | P31553 |
| C00080 | P31675 |
| C00080 | P31979 |
| C00080 | P32369 |
| C00080 | P32487 |
| C00080 | P33026 |
| C00080 | P33231 |
| C00080 | P33599 |
| C00080 | P33602 |
| C00080 | P33607 |
| C00080 | P34579 |
| C00080 | P34711 |
| C00080 | P36035 |
| C00080 | P37460 |

|        |        |
|--------|--------|
| C00080 | P37594 |
| C00080 | P37735 |
| C00080 | P38077 |
| C00080 | P38084 |
| C00080 | P38085 |
| C00080 | P38124 |
| C00080 | P38196 |
| C00080 | P38206 |
| C00080 | P38680 |
| C00080 | P38724 |
| C00080 | P38778 |
| C00080 | P38971 |
| C00080 | P39344 |
| C00080 | P39843 |
| C00080 | P39886 |
| C00080 | P39952 |
| C00080 | P39980 |
| C00080 | P40812 |
| C00080 | P41036 |
| C00080 | P41438 |
| C00080 | P42086 |
| C00080 | P42237 |
| C00080 | P42308 |
| C00080 | P42670 |
| C00080 | P43505 |
| C00080 | P43548 |
| C00080 | P45562 |
| C00080 | P46032 |
| C00080 | P46104 |
| C00080 | P46133 |
| C00080 | P46349 |
| C00080 | P48777 |
| C00080 | P48813 |
| C00080 | P50276 |
| C00080 | P50487 |
| C00080 | P50537 |
| C00080 | P51164 |
| C00080 | P51574 |
| C00080 | P52002 |
| C00080 | P53048 |
| C00080 | P53388 |
| C00080 | P53985 |
| C00080 | P54104 |
| C00080 | P54219 |
| C00080 | P54417 |
| C00080 | P55069 |
| C00080 | P60678 |
| C00080 | P60682 |

|        |        |
|--------|--------|
| C00080 | P60686 |
| C00080 | P60690 |
| C00080 | P60694 |
| C00080 | P60698 |
| C00080 | P61829 |
| C00080 | P68699 |
| C00080 | P69926 |
| C00080 | P70786 |
| C00080 | P74072 |
| C00080 | P74898 |
| C00080 | P74899 |
| C00080 | P74900 |
| C00080 | P74901 |
| C00080 | P74902 |
| C00080 | P74903 |
| C00080 | P76350 |
| C00080 | P76460 |
| C00080 | P77589 |
| C00080 | P92961 |
| C00080 | P94131 |
| C00080 | P94633 |
| C00080 | P95827 |
| C00080 | P96517 |
| C00080 | P96796 |
| C00080 | P96797 |
| C00080 | P97054 |
| C00080 | P97055 |
| C00080 | Q00538 |
| C00080 | Q01440 |
| C00080 | Q01818 |
| C00080 | Q01857 |
| C00080 | Q02563 |
| C00080 | Q04733 |
| C00080 | Q04895 |
| C00080 | Q05085 |
| C00080 | Q05181 |
| C00080 | Q05998 |
| C00080 | Q07307 |
| C00080 | Q07394 |
| C00080 | Q07396 |
| C00080 | Q07492 |
| C00080 | Q07824 |
| C00080 | Q08299 |
| C00080 | Q08986 |
| C00080 | Q12165 |
| C00080 | Q12349 |
| C00080 | Q25272 |
| C00080 | Q39608 |

|        |        |
|--------|--------|
| C00080 | Q41515 |
| C00080 | Q42400 |
| C00080 | Q43390 |
| C00080 | Q44659 |
| C00080 | Q44660 |
| C00080 | Q45082 |
| C00080 | Q45153 |
| C00080 | Q46M63 |
| C00080 | Q47142 |
| C00080 | Q48797 |
| C00080 | Q50248 |
| C00080 | Q50249 |
| C00080 | Q50250 |
| C00080 | Q50392 |
| C00080 | Q51006 |
| C00080 | Q51073 |
| C00080 | Q51955 |
| C00080 | Q52000 |
| C00080 | Q52715 |
| C00080 | Q52716 |
| C00080 | Q52978 |
| C00080 | Q52980 |
| C00080 | Q52981 |
| C00080 | Q52982 |
| C00080 | Q52983 |
| C00080 | Q53787 |
| C00080 | Q53903 |
| C00080 | Q54806 |
| C00080 | Q55027 |
| C00080 | Q56EB3 |
| C00080 | Q57038 |
| C00080 | Q59574 |
| C00080 | Q59575 |
| C00080 | Q59576 |
| C00080 | Q59577 |
| C00080 | Q59578 |
| C00080 | Q59579 |
| C00080 | Q59580 |
| C00080 | Q60183 |
| C00080 | Q60184 |
| C00080 | Q60185 |
| C00080 | Q60186 |
| C00080 | Q60187 |
| C00080 | Q60188 |
| C00080 | Q60189 |
| C00080 | Q60961 |
| C00080 | Q61168 |
| C00080 | Q63089 |

|        |        |
|--------|--------|
| C00080 | Q63965 |
| C00080 | Q6FIH7 |
| C00080 | Q79VC7 |
| C00080 | Q79VE0 |
| C00080 | Q8LBP4 |
| C00080 | Q8R4H8 |
| C00080 | Q93YH1 |
| C00080 | Q96241 |
| C00080 | Q96247 |
| C00080 | Q96T83 |
| C00080 | Q99271 |
| C00080 | Q99385 |
| C00080 | Q9C6B8 |
| C00080 | Q9H015 |
| C00080 | Q9LU77 |
| C00080 | Q9R1U7 |
| C00080 | Q9RPV1 |
| C00080 | Q9S3J9 |
| C00080 | Q9S3K0 |
| C00080 | Q9UAC2 |
| C00080 | Q9WTM1 |
| C00080 | Q9X9D2 |
| C00080 | Q9Y860 |
| C00080 | Q9Z3Q3 |
| C00080 | Q9ZHC9 |
| C00080 | Q9ZNG6 |
| C00082 | P0AAD5 |
| C00082 | P38085 |
| C00082 | P44727 |
| C00082 | P44747 |
| C00082 | Q04671 |
| C00082 | Q62052 |
| C00086 | O05123 |
| C00086 | O94469 |
| C00086 | P33413 |
| C00086 | Q13336 |
| C00086 | Q15849 |
| C00086 | Q8VHL0 |
| C00086 | Q9URY6 |
| C00088 | O82811 |
| C00088 | P0AC26 |
| C00088 | P0AC27 |
| C00088 | P10903 |
| C00088 | P37758 |
| C00088 | P38043 |
| C00088 | P38044 |
| C00088 | P38045 |
| C00088 | P38046 |



|        |        |
|--------|--------|
| C00088 | Q166T6 |
| C00088 | Q93PW1 |
| C00089 | A8F6Z4 |
| C00089 | B0K2P2 |
| C00089 | B0K2P3 |
| C00089 | B1L0U0 |
| C00089 | B1L0U1 |
| C00089 | O14091 |
| C00089 | O31427 |
| C00089 | O31428 |
| C00089 | O80605 |
| C00089 | P08470 |
| C00089 | P12655 |
| C00089 | P15400 |
| C00089 | P18767 |
| C00089 | P30000 |
| C00089 | P40739 |
| C00089 | Q0ILJ3 |
| C00089 | Q39231 |
| C00089 | Q39232 |
| C00089 | Q67YF8 |
| C00089 | Q6A329 |
| C00089 | Q6KYW8 |
| C00089 | Q6KYW9 |
| C00089 | Q8NMD6 |
| C00089 | Q9C8X2 |
| C00089 | Q9CJZ2 |
| C00089 | Q9FE59 |
| C00089 | Q9FG00 |
| C00089 | Q9X2W0 |
| C00089 | Q9Z3R5 |
| C00089 | Q9Z3R6 |
| C00089 | Q9Z3R7 |
| C00089 | Q9ZVK6 |
| C00092 | O43826 |
| C00092 | P09836 |
| C00092 | P39580 |
| C00093 | P57057 |
| C00093 | P96335 |
| C00093 | Q0K998 |
| C00093 | Q1LLP5 |
| C00093 | Q1M589 |
| C00093 | Q1M8R6 |
| C00093 | Q2K1C8 |
| C00093 | Q2K4V4 |
| C00093 | Q2K6L3 |
| C00093 | Q578E9 |
| C00093 | Q5LX21 |

|        |        |
|--------|--------|
| C00093 | Q62GB4 |
| C00093 | Q63Q62 |
| C00093 | Q66FU4 |
| C00093 | Q6CZ34 |
| C00093 | Q6G194 |
| C00093 | Q6G5J0 |
| C00093 | Q6NDQ0 |
| C00093 | Q74R28 |
| C00093 | Q7MLB8 |
| C00093 | Q7VYN2 |
| C00093 | Q7W6G5 |
| C00093 | Q7WID6 |
| C00093 | Q89WG0 |
| C00093 | Q8FW07 |
| C00093 | Q8UBB7 |
| C00093 | Q8UII7 |
| C00093 | Q8X6U5 |
| C00093 | Q8XZX8 |
| C00093 | Q8YCB1 |
| C00093 | Q8Z245 |
| C00093 | Q8ZLF4 |
| C00093 | Q92WD6 |
| C00093 | Q98G42 |
| C00093 | Q9KRT4 |
| C00098 | O01840 |
| C00098 | O04514 |
| C00098 | O31307 |
| C00098 | O31309 |
| C00098 | O31310 |
| C00098 | O31315 |
| C00098 | O50927 |
| C00098 | O51307 |
| C00098 | O51308 |
| C00098 | O51310 |
| C00098 | O54584 |
| C00098 | O82485 |
| C00098 | P04285 |
| C00098 | P06202 |
| C00098 | P08005 |
| C00098 | P08006 |
| C00098 | P08007 |
| C00098 | P0A2U8 |
| C00098 | P0A2V4 |
| C00098 | P0A2V5 |
| C00098 | P0A2V6 |
| C00098 | P0A4G0 |
| C00098 | P0A4M7 |
| C00098 | P0A4M9 |

|        |        |
|--------|--------|
| C00098 | P0A4N7 |
| C00098 | P0A4N8 |
| C00098 | P0A4N9 |
| C00098 | P0A4P0 |
| C00098 | P0AFH4 |
| C00098 | P0AFH5 |
| C00098 | P0AFH7 |
| C00098 | P18766 |
| C00098 | P18791 |
| C00098 | P40897 |
| C00098 | P45051 |
| C00098 | P45052 |
| C00098 | P45053 |
| C00098 | P45054 |
| C00098 | P46059 |
| C00098 | P47323 |
| C00098 | P47324 |
| C00098 | P47325 |
| C00098 | P47326 |
| C00098 | P50980 |
| C00098 | P71370 |
| C00098 | P72479 |
| C00098 | P75551 |
| C00098 | P75552 |
| C00098 | P75553 |
| C00098 | P75554 |
| C00098 | P75796 |
| C00098 | P75797 |
| C00098 | P75798 |
| C00098 | P75799 |
| C00098 | P77348 |
| C00098 | Q02VA9 |
| C00098 | Q06593 |
| C00098 | Q07733 |
| C00098 | Q16348 |
| C00098 | Q17758 |
| C00098 | Q21219 |
| C00098 | Q2FZR3 |
| C00098 | Q2FZR4 |
| C00098 | Q2FZR5 |
| C00098 | Q2FZR6 |
| C00098 | Q2FZR7 |
| C00098 | Q5HG38 |
| C00098 | Q5HG39 |
| C00098 | Q5HG40 |
| C00098 | Q5HG41 |
| C00098 | Q7A5Q6 |
| C00098 | Q7A5Q7 |

|        |        |
|--------|--------|
| C00098 | Q7A5Q8 |
| C00098 | Q7A5Q9 |
| C00098 | Q8BPX9 |
| C00098 | Q8CBB2 |
| C00098 | Q8Z6Q5 |
| C00098 | Q91W98 |
| C00098 | Q92NE8 |
| C00098 | Q92NE9 |
| C00098 | Q92NF0 |
| C00098 | Q92NF1 |
| C00098 | Q9CEK0 |
| C00098 | Q9FG72 |
| C00098 | Q9FJD1 |
| C00098 | Q9FJD2 |
| C00098 | Q9FME8 |
| C00098 | Q9T095 |
| C00098 | Q9WXN4 |
| C00098 | Q9WXN5 |
| C00098 | Q9WXN6 |
| C00098 | Q9WXN7 |
| C00098 | Q9WXN8 |
| C00098 | Q9WXS6 |
| C00098 | Q9WXS7 |
| C00098 | Q9WXS8 |
| C00098 | Q9WXS9 |
| C00098 | Q9WXT0 |
| C00098 | Q9X0F3 |
| C00098 | Q9X0F4 |
| C00098 | Q9X0F5 |
| C00098 | Q9X0F6 |
| C00098 | Q9X0F7 |
| C00098 | Q9X0U6 |
| C00098 | Q9X0U7 |
| C00098 | Q9X0U8 |
| C00098 | Q9X0U9 |
| C00098 | Q9X0V0 |
| C00098 | Q9X268 |
| C00098 | Q9X269 |
| C00098 | Q9X270 |
| C00098 | Q9X271 |
| C00098 | Q9X272 |
| C00099 | P46349 |
| C00101 | P41438 |
| C00106 | P05316 |
| C00106 | P0AGM7 |
| C00106 | P0AGM8 |
| C00106 | P45117 |
| C00106 | Q10279 |

|        |        |
|--------|--------|
| C00106 | Q9CPL9 |
| C00107 | P0AAG1 |
| C00107 | P0AAG2 |
| C00107 | P0AEG0 |
| C00107 | P0AEG3 |
| C00107 | P0AFU1 |
| C00107 | P26902 |
| C00107 | P26903 |
| C00107 | P26904 |
| C00107 | P26905 |
| C00107 | P26906 |
| C00107 | P33913 |
| C00107 | P33915 |
| C00107 | P33916 |
| C00107 | P42061 |
| C00107 | P42062 |
| C00107 | P42063 |
| C00107 | P42064 |
| C00107 | P42065 |
| C00107 | P45094 |
| C00107 | P45095 |
| C00107 | P45096 |
| C00107 | P51000 |
| C00107 | Q5V9R8 |
| C00107 | Q5V9R9 |
| C00107 | Q5V9S0 |
| C00107 | Q5V9S1 |
| C00107 | Q5V9S2 |
| C00107 | Q64K09 |
| C00107 | Q7CQ74 |
| C00107 | Q8ZNJ8 |
| C00107 | Q8ZNJ9 |
| C00107 | Q8ZNK0 |
| C00107 | Q9CIK8 |
| C00107 | Q9CIK9 |
| C00107 | Q9CIL0 |
| C00107 | Q9CIL1 |
| C00107 | Q9CIL2 |
| C00107 | Q9F9T4 |
| C00107 | Q9F9T5 |
| C00107 | Q9F9T6 |
| C00107 | Q9F9T7 |
| C00114 | O32243 |
| C00114 | O34742 |
| C00114 | O34878 |
| C00114 | O34992 |
| C00114 | P0ABC9 |
| C00114 | P0ABD0 |

|        |        |
|--------|--------|
| C00114 | P0AFM2 |
| C00114 | P14175 |
| C00114 | P14176 |
| C00114 | P19807 |
| C00114 | P28570 |
| C00114 | P39775 |
| C00114 | Q45460 |
| C00114 | Q45461 |
| C00114 | Q45462 |
| C00114 | Q87WH3 |
| C00114 | Q87WH4 |
| C00114 | Q87WH5 |
| C00114 | Q8BGY9 |
| C00114 | Q8BY89 |
| C00114 | Q8IWA5 |
| C00114 | Q8Q040 |
| C00114 | Q8Q041 |
| C00114 | Q8Q042 |
| C00114 | Q8Q043 |
| C00114 | Q8WWI5 |
| C00114 | Q9GZV3 |
| C00114 | Q9HTH6 |
| C00114 | Q9HTI6 |
| C00114 | Q9HTI7 |
| C00114 | Q9HTI8 |
| C00116 | A3QNP2 |
| C00116 | P08194 |
| C00116 | P0A3Q7 |
| C00116 | P0AER2 |
| C00116 | P0AG80 |
| C00116 | P10905 |
| C00116 | P10906 |
| C00116 | P10907 |
| C00116 | P19255 |
| C00116 | P23900 |
| C00116 | P31140 |
| C00116 | P33941 |
| C00116 | P33951 |
| C00116 | P44826 |
| C00116 | P47279 |
| C00116 | P52280 |
| C00116 | P53154 |
| C00116 | P75071 |
| C00116 | Q08929 |
| C00116 | Q26C21 |
| C00116 | Q45592 |
| C00116 | Q45593 |
| C00116 | Q48475 |

|        |        |
|--------|--------|
| C00116 | Q48476 |
| C00116 | Q51340 |
| C00116 | Q51389 |
| C00116 | Q54121 |
| C00116 | Q55035 |
| C00116 | Q55471 |
| C00116 | Q55472 |
| C00116 | Q55473 |
| C00116 | Q6E7E8 |
| C00116 | Q6E7E9 |
| C00116 | Q88P38 |
| C00116 | Q8K9M9 |
| C00116 | Q8KN17 |
| C00116 | Q8KN18 |
| C00116 | Q8KN19 |
| C00116 | Q93GF4 |
| C00116 | Q9CE02 |
| C00116 | Q9L0Q1 |
| C00116 | Q9X1E3 |
| C00120 | O70247 |
| C00121 | P0A2C5 |
| C00121 | P0A2C6 |
| C00121 | P44737 |
| C00122 | P33303 |
| C00133 | P0AAE1 |
| C00134 | A0LUE6 |
| C00134 | A3CMQ7 |
| C00134 | O51587 |
| C00134 | O83658 |
| C00134 | P0A2C7 |
| C00134 | P0A2C8 |
| C00134 | P0A2J7 |
| C00134 | P0A2J8 |
| C00134 | P0AAF1 |
| C00134 | P0AFK4 |
| C00134 | P0AFK5 |
| C00134 | P0AFK6 |
| C00134 | P0AFK8 |
| C00134 | P0AFK9 |
| C00134 | P0AFL0 |
| C00134 | P0AFL1 |
| C00134 | P31133 |
| C00134 | P31134 |
| C00134 | P31135 |
| C00134 | P40790 |
| C00134 | P44731 |
| C00134 | P44768 |
| C00134 | P45168 |

|        |        |
|--------|--------|
| C00134 | P45169 |
| C00134 | P45170 |
| C00134 | P45171 |
| C00134 | P47288 |
| C00134 | P47289 |
| C00134 | P47290 |
| C00134 | P69874 |
| C00134 | P69876 |
| C00134 | P69877 |
| C00134 | P75057 |
| C00134 | P75058 |
| C00134 | P75059 |
| C00134 | Q02R79 |
| C00134 | Q02Z10 |
| C00134 | Q03AH0 |
| C00134 | Q03JH1 |
| C00134 | Q03PF2 |
| C00134 | Q03ZQ0 |
| C00134 | Q042G7 |
| C00134 | Q04BG2 |
| C00134 | Q0AGF4 |
| C00134 | Q0I3Y9 |
| C00134 | Q0RAT5 |
| C00134 | Q0SML1 |
| C00134 | Q18AM3 |
| C00134 | Q2NK31 |
| C00134 | Q2SSS4 |
| C00134 | Q4K681 |
| C00134 | Q5FL41 |
| C00134 | Q5HGY5 |
| C00134 | Q5HQ70 |
| C00134 | Q5L222 |
| C00134 | Q5LT05 |
| C00134 | Q5LYN4 |
| C00134 | Q5ZWE4 |
| C00134 | Q60AI1 |
| C00134 | Q64SQ6 |
| C00134 | Q65UE1 |
| C00134 | Q660M8 |
| C00134 | Q6D4E2 |
| C00134 | Q6F0V4 |
| C00134 | Q6HLQ9 |
| C00134 | Q6KIP2 |
| C00134 | Q6LR20 |
| C00134 | Q6MCV4 |
| C00134 | Q6MU19 |
| C00134 | Q6YPR6 |
| C00134 | Q722B1 |



|        |        |
|--------|--------|
| C00134 | Q72FW5 |
| C00134 | Q74K65 |
| C00134 | Q7A679 |
| C00134 | Q7MKU3 |
| C00134 | Q7NB11 |
| C00134 | Q7VNG4 |
| C00134 | Q81GC1 |
| C00134 | Q81TH8 |
| C00134 | Q82TL6 |
| C00134 | Q830W6 |
| C00134 | Q83RR7 |
| C00134 | Q87PH3 |
| C00134 | Q88ZJ6 |
| C00134 | Q8A883 |
| C00134 | Q8CPN0 |
| C00134 | Q8D9J4 |
| C00134 | Q8DUF7 |
| C00134 | Q8DZJ0 |
| C00134 | Q8E554 |
| C00134 | Q8ELR4 |
| C00134 | Q8EUR3 |
| C00134 | Q8RI39 |
| C00134 | Q8XIZ5 |
| C00134 | Q8Y8T6 |
| C00134 | Q8YM92 |
| C00134 | Q8Z7H7 |
| C00134 | Q92DL6 |
| C00134 | Q97KS6 |
| C00134 | Q98HF7 |
| C00134 | Q98QE1 |
| C00134 | Q9CGD4 |
| C00134 | Q9CP06 |
| C00134 | Q9HY19 |
| C00134 | Q9I6T2 |
| C00134 | Q9KS33 |
| C00134 | Q9PR37 |
| C00134 | Q9X196 |
| C00137 | P30605 |
| C00137 | P30606 |
| C00137 | P53794 |
| C00137 | P87110 |
| C00137 | Q01440 |
| C00137 | Q3UHK1 |
| C00137 | Q8VM88 |
| C00137 | Q96QE2 |
| C00147 | Q84MA8 |
| C00147 | Q9SRK7 |
| C00148 | P0AFM3 |

|        |        |
|--------|--------|
| C00148 | P17327 |
| C00148 | P17328 |
| C00149 | P50537 |
| C00149 | Q02978 |
| C00149 | Q54PY7 |
| C00149 | Q8LG88 |
| C00149 | Q9CR62 |
| C00150 | O32209 |
| C00150 | P0A5Y1 |
| C00150 | P0A625 |
| C00150 | P0AF02 |
| C00150 | P45321 |
| C00150 | P45322 |
| C00150 | P45323 |
| C00150 | P59738 |
| C00150 | Q4KB64 |
| C00150 | Q5P4W2 |
| C00150 | Q608V9 |
| C00150 | Q65SW3 |
| C00150 | Q66D71 |
| C00150 | Q6D7D0 |
| C00150 | Q6LHL2 |
| C00150 | Q6N0P7 |
| C00150 | Q7ME63 |
| C00150 | Q7N6R3 |
| C00150 | Q7VKP7 |
| C00150 | Q7VUJ5 |
| C00150 | Q7W1F4 |
| C00150 | Q7WP62 |
| C00150 | Q87HN4 |
| C00150 | Q881C1 |
| C00150 | Q89EW7 |
| C00150 | Q89TQ9 |
| C00150 | Q8D740 |
| C00150 | Q8EAN3 |
| C00150 | Q8FXI7 |
| C00150 | Q8X4V7 |
| C00150 | Q8YE15 |
| C00150 | Q8Z8A4 |
| C00150 | Q8ZGX6 |
| C00150 | Q8ZQR6 |
| C00150 | Q92LU2 |
| C00150 | Q98KI3 |
| C00150 | Q9CMS0 |
| C00150 | Q9I2N4 |
| C00150 | Q9KLL9 |
| C00152 | P0A4W1 |
| C00152 | P40812 |

|        |        |
|--------|--------|
| C00152 | Q7VEQ4 |
| C00152 | Q9X7P0 |
| C00156 | Q43975 |
| C00156 | Q51955 |
| C00156 | Q9I6Q3 |
| C00158 | O35055 |
| C00158 | P0A2F8 |
| C00158 | P0A2F9 |
| C00158 | P0A2G3 |
| C00158 | P0A2G4 |
| C00158 | P0AE74 |
| C00158 | P0AE75 |
| C00158 | P16482 |
| C00158 | P21608 |
| C00158 | P31602 |
| C00158 | P38152 |
| C00158 | P42308 |
| C00158 | P55069 |
| C00158 | P94363 |
| C00158 | Q13183 |
| C00158 | Q48769 |
| C00158 | Q67BT3 |
| C00158 | Q86YT5 |
| C00158 | Q9VVT2 |
| C00159 | O07563 |
| C00159 | P26379 |
| C00159 | P26380 |
| C00159 | P26381 |
| C00159 | P26382 |
| C00159 | P69797 |
| C00159 | P69799 |
| C00159 | P69800 |
| C00159 | P69801 |
| C00159 | P69803 |
| C00159 | P69804 |
| C00159 | P69805 |
| C00159 | P69807 |
| C00159 | Q01441 |
| C00162 | P43505 |
| C00162 | P44051 |
| C00162 | Q51006 |
| C00162 | Q51073 |
| C00175 | A3CRB8 |
| C00175 | A3CRB9 |
| C00175 | A6TDB4 |
| C00175 | B5XUV2 |
| C00175 | O25901 |
| C00175 | O26234 |

|        |        |
|--------|--------|
| C00175 | O27739 |
| C00175 | O29529 |
| C00175 | O54189 |
| C00175 | O85143 |
| C00175 | P0A2R8 |
| C00175 | P0A2R9 |
| C00175 | P0ABI6 |
| C00175 | P0ABI7 |
| C00175 | P0C0E8 |
| C00175 | P13511 |
| C00175 | P13512 |
| C00175 | P28795 |
| C00175 | P32798 |
| C00175 | P37617 |
| C00175 | P37972 |
| C00175 | P44998 |
| C00175 | P47425 |
| C00175 | P47426 |
| C00175 | P96454 |
| C00175 | Q032H3 |
| C00175 | Q032H4 |
| C00175 | Q035B2 |
| C00175 | Q035B3 |
| C00175 | Q03EE4 |
| C00175 | Q03I82 |
| C00175 | Q03I83 |
| C00175 | Q03PY5 |
| C00175 | Q03PY6 |
| C00175 | Q03ZL5 |
| C00175 | Q03ZL6 |
| C00175 | Q045Z7 |
| C00175 | Q045Z8 |
| C00175 | Q04BY6 |
| C00175 | Q04BY7 |
| C00175 | Q04EY4 |
| C00175 | Q04EY5 |
| C00175 | Q04FM1 |
| C00175 | Q05594 |
| C00175 | Q05595 |
| C00175 | Q05596 |
| C00175 | Q05598 |
| C00175 | Q07418 |
| C00175 | Q0AUL1 |
| C00175 | Q18CI9 |
| C00175 | Q18CJ0 |
| C00175 | Q2FNX9 |
| C00175 | Q2FRT7 |
| C00175 | Q2LY16 |

|        |        |
|--------|--------|
| C00175 | Q2NIT5 |
| C00175 | Q2NQF9 |
| C00175 | Q2SRI1 |
| C00175 | Q2SRI2 |
| C00175 | Q3ABN1 |
| C00175 | Q491Z9 |
| C00175 | Q4A5A4 |
| C00175 | Q4A5A5 |
| C00175 | Q50293 |
| C00175 | Q50294 |
| C00175 | Q58488 |
| C00175 | Q58490 |
| C00175 | Q5FM62 |
| C00175 | Q5FM63 |
| C00175 | Q5HDY6 |
| C00175 | Q5HDY7 |
| C00175 | Q5HM27 |
| C00175 | Q5HM28 |
| C00175 | Q5KG96 |
| C00175 | Q5L3Q9 |
| C00175 | Q5L3R0 |
| C00175 | Q5LXJ3 |
| C00175 | Q5LXJ4 |
| C00175 | Q65P76 |
| C00175 | Q65P77 |
| C00175 | Q65VT3 |
| C00175 | Q66FY7 |
| C00175 | Q67JX3 |
| C00175 | Q67JX4 |
| C00175 | Q6CZH4 |
| C00175 | Q6F1W4 |
| C00175 | Q6F1W5 |
| C00175 | Q6HPM9 |
| C00175 | Q6HPN0 |
| C00175 | Q6KHL1 |
| C00175 | Q6KHL2 |
| C00175 | Q6LX68 |
| C00175 | Q6LX70 |
| C00175 | Q6MSQ1 |
| C00175 | Q6MSQ2 |
| C00175 | Q6YR39 |
| C00175 | Q71WH7 |
| C00175 | Q71WH8 |
| C00175 | Q74L61 |
| C00175 | Q74L62 |
| C00175 | Q7A470 |
| C00175 | Q7A471 |
| C00175 | Q7M9C0 |

|        |        |
|--------|--------|
| C00175 | Q7MYP0 |
| C00175 | Q7NAQ6 |
| C00175 | Q7NAQ7 |
| C00175 | Q7VFJ7 |
| C00175 | Q7VN59 |
| C00175 | Q7VRM7 |
| C00175 | Q81J15 |
| C00175 | Q81J16 |
| C00175 | Q81VQ1 |
| C00175 | Q81VQ2 |
| C00175 | Q839D4 |
| C00175 | Q839D5 |
| C00175 | Q88XV1 |
| C00175 | Q88XV2 |
| C00175 | Q890R2 |
| C00175 | Q890R3 |
| C00175 | Q8CRI6 |
| C00175 | Q8CRI7 |
| C00175 | Q8DRR9 |
| C00175 | Q8DRS0 |
| C00175 | Q8DWR3 |
| C00175 | Q8DWR4 |
| C00175 | Q8E2L2 |
| C00175 | Q8E2L3 |
| C00175 | Q8ETV6 |
| C00175 | Q8ETV7 |
| C00175 | Q8EUF1 |
| C00175 | Q8R7Y4 |
| C00175 | Q8R7Y5 |
| C00175 | Q8RHL0 |
| C00175 | Q8TI16 |
| C00175 | Q8XHV2 |
| C00175 | Q8XHV3 |
| C00175 | Q8XNY9 |
| C00175 | Q8Y454 |
| C00175 | Q8Y455 |
| C00175 | Q8YQ90 |
| C00175 | Q8Z5N3 |
| C00175 | Q8Z5N5 |
| C00175 | Q8ZAG5 |
| C00175 | Q927N8 |
| C00175 | Q927N9 |
| C00175 | Q97EK8 |
| C00175 | Q97EK9 |
| C00175 | Q98QH4 |
| C00175 | Q98QH5 |
| C00175 | Q99XI2 |
| C00175 | Q9CLC4 |

|        |        |
|--------|--------|
| C00175 | Q9HPH5 |
| C00175 | Q9KGD6 |
| C00175 | Q9PPI1 |
| C00175 | Q9PPV1 |
| C00175 | Q9PPV2 |
| C00175 | Q9WZ31 |
| C00175 | Q9Z9J3 |
| C00180 | O30513 |
| C00180 | P07775 |
| C00181 | P0AGI6 |
| C00181 | P0AGI7 |
| C00181 | P45045 |
| C00181 | P45046 |
| C00181 | P45047 |
| C00181 | Q5KYS1 |
| C00181 | Q6DB03 |
| C00181 | Q6LUY1 |
| C00181 | Q7CFR2 |
| C00181 | Q83J33 |
| C00181 | Q880Z2 |
| C00181 | Q8XDM1 |
| C00181 | Q8XPK6 |
| C00185 | O05506 |
| C00185 | P08722 |
| C00185 | P24241 |
| C00186 | P65254 |
| C00186 | Q8Z2E3 |
| C00186 | Q8ZL63 |
| C00186 | Q9K5Z9 |
| C00187 | Q91V24 |
| C00188 | O31199 |
| C00188 | P0AAD8 |
| C00188 | P0AG38 |
| C00188 | P0AGE4 |
| C00189 | Q53148 |
| C00190 | Q8CIA5 |
| C00191 | C9RT46 |
| C00191 | O82390 |
| C00191 | O85018 |
| C00191 | P08716 |
| C00191 | P0AA78 |
| C00191 | P18770 |
| C00191 | P23886 |
| C00191 | P29018 |
| C00191 | P77307 |
| C00191 | Q07YH1 |
| C00191 | Q09LY6 |
| C00191 | Q09LY7 |

|        |        |
|--------|--------|
| C00191 | Q12235 |
| C00191 | Q54203 |
| C00191 | Q54204 |
| C00191 | Q5W7C1 |
| C00191 | Q5Z8H2 |
| C00191 | Q88RG3 |
| C00191 | Q8BFU8 |
| C00191 | Q9BYT1 |
| C00191 | Q9I2M0 |
| C00191 | Q9I2M1 |
| C00191 | Q9I2M2 |
| C00191 | Q9Y2C5 |
| C00191 | Q9Z4Q1 |
| C00191 | Q9Z4Q2 |
| C00201 | Q9X9D2 |
| C00208 | A3MWP1 |
| C00208 | A3MWP2 |
| C00208 | A5A639 |
| C00208 | A8F6Z4 |
| C00208 | B0K2P2 |
| C00208 | B0K2P3 |
| C00208 | B1L0U0 |
| C00208 | B1L0U1 |
| C00208 | O31427 |
| C00208 | O31428 |
| C00208 | O32748 |
| C00208 | O51923 |
| C00208 | O51924 |
| C00208 | O51925 |
| C00208 | O54396 |
| C00208 | P02916 |
| C00208 | P0ABM0 |
| C00208 | P0ABM7 |
| C00208 | P0AEX9 |
| C00208 | P0AEY0 |
| C00208 | P0CD99 |
| C00208 | P0CE00 |
| C00208 | P15685 |
| C00208 | P18767 |
| C00208 | P19566 |
| C00208 | P19576 |
| C00208 | P19642 |
| C00208 | P23212 |
| C00208 | P24584 |
| C00208 | P24586 |
| C00208 | P26467 |
| C00208 | P26468 |
| C00208 | P30963 |



|        |        |
|--------|--------|
| C00208 | P30964 |
| C00208 | P31675 |
| C00208 | P33116 |
| C00208 | P37608 |
| C00208 | P38156 |
| C00208 | P39115 |
| C00208 | P42332 |
| C00208 | P42333 |
| C00208 | P42334 |
| C00208 | P43109 |
| C00208 | P43110 |
| C00208 | P58300 |
| C00208 | P59213 |
| C00208 | P68183 |
| C00208 | P68185 |
| C00208 | P68186 |
| C00208 | P68187 |
| C00208 | P68188 |
| C00208 | P73329 |
| C00208 | P74256 |
| C00208 | P74757 |
| C00208 | P93280 |
| C00208 | P97046 |
| C00208 | Q03203 |
| C00208 | Q07638 |
| C00208 | Q07639 |
| C00208 | Q57403 |
| C00208 | Q5TLL2 |
| C00208 | Q65DD1 |
| C00208 | Q65DD3 |
| C00208 | Q65QT6 |
| C00208 | Q664X5 |
| C00208 | Q6KYW8 |
| C00208 | Q6KYW9 |
| C00208 | Q74RF8 |
| C00208 | Q74RF9 |
| C00208 | Q7A937 |
| C00208 | Q7MFC1 |
| C00208 | Q7MFC2 |
| C00208 | Q7MFC4 |
| C00208 | Q7N983 |
| C00208 | Q7N984 |
| C00208 | Q7N986 |
| C00208 | Q7UBD0 |
| C00208 | Q83P81 |
| C00208 | Q83XH0 |
| C00208 | Q83XH1 |
| C00208 | Q87GB5 |

|        |        |
|--------|--------|
| C00208 | Q87GB7 |
| C00208 | Q87GB8 |
| C00208 | Q8L122 |
| C00208 | Q8L124 |
| C00208 | Q8L125 |
| C00208 | Q8L126 |
| C00208 | Q8R6Q4 |
| C00208 | Q8R6Q5 |
| C00208 | Q8R6Q6 |
| C00208 | Q8RJU8 |
| C00208 | Q8RJU9 |
| C00208 | Q8RJV0 |
| C00208 | Q8TZP9 |
| C00208 | Q8TZQ0 |
| C00208 | Q8TZQ3 |
| C00208 | Q8XE58 |
| C00208 | Q8Z1U0 |
| C00208 | Q8Z1U2 |
| C00208 | Q8Z1U3 |
| C00208 | Q8ZAS8 |
| C00208 | Q93KB7 |
| C00208 | Q93KB8 |
| C00208 | Q93KB9 |
| C00208 | Q93KC0 |
| C00208 | Q97UF2 |
| C00208 | Q97UF3 |
| C00208 | Q97UF4 |
| C00208 | Q97UF5 |
| C00208 | Q97UY8 |
| C00208 | Q97UY9 |
| C00208 | Q97UZ0 |
| C00208 | Q97UZ1 |
| C00208 | Q97ZC0 |
| C00208 | Q97ZC1 |
| C00208 | Q97ZC2 |
| C00208 | Q97ZC3 |
| C00208 | Q9AI63 |
| C00208 | Q9AI66 |
| C00208 | Q9AI67 |
| C00208 | Q9AI68 |
| C00208 | Q9C8T1 |
| C00208 | Q9KL04 |
| C00208 | Q9KL06 |
| C00208 | Q9KL07 |
| C00208 | Q9KWT5 |
| C00208 | Q9KWT6 |
| C00208 | Q9KWT7 |
| C00208 | Q9KWT8 |

|        |        |
|--------|--------|
| C00208 | Q9KWT9 |
| C00208 | Q9LF50 |
| C00208 | Q9R9Q4 |
| C00208 | Q9R9Q5 |
| C00208 | Q9R9Q6 |
| C00208 | Q9R9Q7 |
| C00208 | Q9V297 |
| C00208 | Q9X2W0 |
| C00208 | Q9Z3R5 |
| C00208 | Q9Z3R6 |
| C00208 | Q9Z3R7 |
| C00209 | Q51330 |
| C00215 | P21420 |
| C00230 | Q51955 |
| C00238 | A0KJR8 |
| C00238 | A0KL61 |
| C00238 | A0LJ91 |
| C00238 | A0LP92 |
| C00238 | A0R395 |
| C00238 | A1KHG8 |
| C00238 | A1KHH0 |
| C00238 | A2BDX4 |
| C00238 | A2RUL8 |
| C00238 | A3KLL5 |
| C00238 | A4D0V9 |
| C00238 | A4IVV7 |
| C00238 | A4SGR1 |
| C00238 | A5EHA3 |
| C00238 | A5EHG1 |
| C00238 | A5EHG2 |
| C00238 | A5EQ10 |
| C00238 | A5ESW9 |
| C00238 | A5VRD1 |
| C00238 | A6H8H5 |
| C00238 | A6T4I3 |
| C00238 | A6T6D7 |
| C00238 | A6T6D8 |
| C00238 | A6T6D9 |
| C00238 | A6TEY9 |
| C00238 | A6TG51 |
| C00238 | A6U6M1 |
| C00238 | A6UM20 |
| C00238 | A6UMS8 |
| C00238 | A8HY21 |
| C00238 | A8MYU2 |
| C00238 | A9C190 |
| C00238 | A9LNM6 |
| C00238 | B2R8T4 |

|        |        |
|--------|--------|
| C00238 | B2RDS2 |
| C00238 | B5TJL4 |
| C00238 | B5TJL8 |
| C00238 | B5XN76 |
| C00238 | B5XZE8 |
| C00238 | B5XZE9 |
| C00238 | B5XZF0 |
| C00238 | B5XZK9 |
| C00238 | B5Y1Z8 |
| C00238 | B9JA25 |
| C00238 | B9JKQ7 |
| C00238 | B9JKQ9 |
| C00238 | B9K2I1 |
| C00238 | B9K2I3 |
| C00238 | D3DSH5 |
| C00238 | D3DTA5 |
| C00238 | D3DTQ2 |
| C00238 | D3DV90 |
| C00238 | D3DVE4 |
| C00238 | D3DX04 |
| C00238 | O00180 |
| C00238 | O08581 |
| C00238 | O14649 |
| C00238 | O15554 |
| C00238 | O18367 |
| C00238 | O22397 |
| C00238 | O22881 |
| C00238 | O27564 |
| C00238 | O31658 |
| C00238 | O32081 |
| C00238 | O32327 |
| C00238 | O32328 |
| C00238 | O35111 |
| C00238 | O35173 |
| C00238 | O35174 |
| C00238 | O43525 |
| C00238 | O43526 |
| C00238 | O49423 |
| C00238 | O54982 |
| C00238 | O60721 |
| C00238 | O60741 |
| C00238 | O60928 |
| C00238 | O64769 |
| C00238 | O80739 |
| C00238 | O88335 |
| C00238 | O88454 |
| C00238 | O88703 |
| C00238 | O88704 |

|        |        |
|--------|--------|
| C00238 | O88705 |
| C00238 | O88932 |
| C00238 | O89109 |
| C00238 | O95069 |
| C00238 | O95259 |
| C00238 | O95279 |
| C00238 | P03959 |
| C00238 | P03960 |
| C00238 | P03961 |
| C00238 | P05023 |
| C00238 | P05026 |
| C00238 | P07038 |
| C00238 | P0A008 |
| C00238 | P0A057 |
| C00238 | P0A333 |
| C00238 | P0AFZ8 |
| C00238 | P0AFZ9 |
| C00238 | P12685 |
| C00238 | P13637 |
| C00238 | P14094 |
| C00238 | P14231 |
| C00238 | P14415 |
| C00238 | P15388 |
| C00238 | P16388 |
| C00238 | P16389 |
| C00238 | P16390 |
| C00238 | P17658 |
| C00238 | P17970 |
| C00238 | P17971 |
| C00238 | P17972 |
| C00238 | P20648 |
| C00238 | P22001 |
| C00238 | P22459 |
| C00238 | P22460 |
| C00238 | P28584 |
| C00238 | P34410 |
| C00238 | P35561 |
| C00238 | P36937 |
| C00238 | P40310 |
| C00238 | P44843 |
| C00238 | P44933 |
| C00238 | P47946 |
| C00238 | P48048 |
| C00238 | P48050 |
| C00238 | P48051 |
| C00238 | P48543 |
| C00238 | P48544 |
| C00238 | P48547 |

|        |        |
|--------|--------|
| C00238 | P48549 |
| C00238 | P50992 |
| C00238 | P50993 |
| C00238 | P51164 |
| C00238 | P51787 |
| C00238 | P54707 |
| C00238 | P54709 |
| C00238 | P54710 |
| C00238 | P55011 |
| C00238 | P55012 |
| C00238 | P55014 |
| C00238 | P56696 |
| C00238 | P57683 |
| C00238 | P57686 |
| C00238 | P57688 |
| C00238 | P57698 |
| C00238 | P57700 |
| C00238 | P57789 |
| C00238 | P58390 |
| C00238 | P59053 |
| C00238 | P59111 |
| C00238 | P59219 |
| C00238 | P60678 |
| C00238 | P60682 |
| C00238 | P60686 |
| C00238 | P60690 |
| C00238 | P60694 |
| C00238 | P60698 |
| C00238 | P63141 |
| C00238 | P63250 |
| C00238 | P63252 |
| C00238 | P63681 |
| C00238 | P63682 |
| C00238 | P63684 |
| C00238 | P65209 |
| C00238 | P65210 |
| C00238 | P65211 |
| C00238 | P65212 |
| C00238 | P65214 |
| C00238 | P73867 |
| C00238 | P78508 |
| C00238 | P86046 |
| C00238 | P92960 |
| C00238 | P94606 |
| C00238 | P97370 |
| C00238 | P97438 |
| C00238 | P97794 |
| C00238 | Q02280 |

|        |        |
|--------|--------|
| C00238 | Q02I77 |
| C00238 | Q02KC0 |
| C00238 | Q035P5 |
| C00238 | Q03719 |
| C00238 | Q03721 |
| C00238 | Q03S07 |
| C00238 | Q03XG1 |
| C00238 | Q04646 |
| C00238 | Q046Q7 |
| C00238 | Q04CF3 |
| C00238 | Q08460 |
| C00238 | Q09470 |
| C00238 | Q09573 |
| C00238 | Q0AIM8 |
| C00238 | Q0BPL2 |
| C00238 | Q0BVS2 |
| C00238 | Q0D9S3 |
| C00238 | Q0JKV1 |
| C00238 | Q0KBR7 |
| C00238 | Q0RF16 |
| C00238 | Q10065 |
| C00238 | Q11PK1 |
| C00238 | Q12809 |
| C00238 | Q13621 |
| C00238 | Q13733 |
| C00238 | Q14003 |
| C00238 | Q14500 |
| C00238 | Q14721 |
| C00238 | Q14CL3 |
| C00238 | Q14D71 |
| C00238 | Q15842 |
| C00238 | Q16322 |
| C00238 | Q17ST2 |
| C00238 | Q18120 |
| C00238 | Q186E8 |
| C00238 | Q19907 |
| C00238 | Q1LP09 |
| C00238 | Q1M651 |
| C00238 | Q1MEX2 |
| C00238 | Q1MKT5 |
| C00238 | Q22271 |
| C00238 | Q23435 |
| C00238 | Q24046 |
| C00238 | Q24048 |
| C00238 | Q2FQC0 |
| C00238 | Q2K2I9 |
| C00238 | Q2K711 |
| C00238 | Q2KBW4 |

|        |        |
|--------|--------|
| C00238 | Q2NQ98 |
| C00238 | Q2NW73 |
| C00238 | Q2RV87 |
| C00238 | Q2RV89 |
| C00238 | Q2YDA1 |
| C00238 | Q38849 |
| C00238 | Q38898 |
| C00238 | Q38998 |
| C00238 | Q39128 |
| C00238 | Q3APU9 |
| C00238 | Q3B1C1 |
| C00238 | Q3KNS8 |
| C00238 | Q3LS21 |
| C00238 | Q3ST91 |
| C00238 | Q43390 |
| C00238 | Q44659 |
| C00238 | Q44660 |
| C00238 | Q47A46 |
| C00238 | Q47GU1 |
| C00238 | Q47H38 |
| C00238 | Q47H39 |
| C00238 | Q47H40 |
| C00238 | Q47IT9 |
| C00238 | Q4KHA4 |
| C00238 | Q4ZFY1 |
| C00238 | Q52978 |
| C00238 | Q52980 |
| C00238 | Q52981 |
| C00238 | Q52982 |
| C00238 | Q52983 |
| C00238 | Q53SA1 |
| C00238 | Q53SU2 |
| C00238 | Q53Y30 |
| C00238 | Q547S7 |
| C00238 | Q57603 |
| C00238 | Q57CC4 |
| C00238 | Q58I19 |
| C00238 | Q5FLF5 |
| C00238 | Q5FMK7 |
| C00238 | Q5FQL0 |
| C00238 | Q5HEC4 |
| C00238 | Q5HK63 |
| C00238 | Q5HK64 |
| C00238 | Q5HK65 |
| C00238 | Q5JK32 |
| C00238 | Q5JMH0 |
| C00238 | Q5KUV3 |
| C00238 | Q5NN77 |



|        |        |
|--------|--------|
| C00238 | Q5P3E3 |
| C00238 | Q5YZH9 |
| C00238 | Q5Z6K9 |
| C00238 | Q5ZC87 |
| C00238 | Q5ZSY2 |
| C00238 | Q5ZTN5 |
| C00238 | Q5ZW98 |
| C00238 | Q605R1 |
| C00238 | Q605R3 |
| C00238 | Q60603 |
| C00238 | Q60A92 |
| C00238 | Q61743 |
| C00238 | Q61923 |
| C00238 | Q62IJ6 |
| C00238 | Q62IJ8 |
| C00238 | Q62JX8 |
| C00238 | Q63US0 |
| C00238 | Q63VS1 |
| C00238 | Q63VS3 |
| C00238 | Q64YU7 |
| C00238 | Q64YU9 |
| C00238 | Q652J4 |
| C00238 | Q653B6 |
| C00238 | Q664Q5 |
| C00238 | Q667S4 |
| C00238 | Q667S5 |
| C00238 | Q66GH5 |
| C00238 | Q67UC7 |
| C00238 | Q67VS5 |
| C00238 | Q69L87 |
| C00238 | Q69RI8 |
| C00238 | Q6A5S0 |
| C00238 | Q6ABJ2 |
| C00238 | Q6B014 |
| C00238 | Q6CZU5 |
| C00238 | Q6D7I3 |
| C00238 | Q6D7I5 |
| C00238 | Q6DB92 |
| C00238 | Q6F793 |
| C00238 | Q6H4L9 |
| C00238 | Q6H4M2 |
| C00238 | Q6H4R6 |
| C00238 | Q6HN77 |
| C00238 | Q6HN78 |
| C00238 | Q6HN79 |
| C00238 | Q6J4K2 |
| C00238 | Q6MLL0 |
| C00238 | Q6N5F2 |

|        |        |
|--------|--------|
| C00238 | Q6N5G6 |
| C00238 | Q6N5H0 |
| C00238 | Q6N5H2 |
| C00238 | Q6N893 |
| C00238 | Q6PIE5 |
| C00238 | Q6PIU1 |
| C00238 | Q6UVM3 |
| C00238 | Q6VV64 |
| C00238 | Q6VVA6 |
| C00238 | Q6YSA9 |
| C00238 | Q6YWQ4 |
| C00238 | Q6ZPR4 |
| C00238 | Q71RS6 |
| C00238 | Q71W89 |
| C00238 | Q71W90 |
| C00238 | Q71W91 |
| C00238 | Q725T6 |
| C00238 | Q741T7 |
| C00238 | Q747C1 |
| C00238 | Q74AA5 |
| C00238 | Q74AA8 |
| C00238 | Q74AB0 |
| C00238 | Q74AK4 |
| C00238 | Q74LN2 |
| C00238 | Q74LN3 |
| C00238 | Q75G84 |
| C00238 | Q795M8 |
| C00238 | Q7A4G4 |
| C00238 | Q7N6W5 |
| C00238 | Q7N6W6 |
| C00238 | Q7N6W7 |
| C00238 | Q7TSH7 |
| C00238 | Q7VTK0 |
| C00238 | Q7VVZ9 |
| C00238 | Q7W536 |
| C00238 | Q7W7H9 |
| C00238 | Q7WCL8 |
| C00238 | Q7WKW8 |
| C00238 | Q7XIV8 |
| C00238 | Q7XLC6 |
| C00238 | Q7XPL3 |
| C00238 | Q7Z418 |
| C00238 | Q80XM3 |
| C00238 | Q81HP9 |
| C00238 | Q81HQ0 |
| C00238 | Q81HQ1 |
| C00238 | Q81UW5 |
| C00238 | Q81UW7 |

|        |        |
|--------|--------|
| C00238 | Q82PI3 |
| C00238 | Q82PI5 |
| C00238 | Q837G9 |
| C00238 | Q83PJ2 |
| C00238 | Q83PY0 |
| C00238 | Q83S83 |
| C00238 | Q83SQ3 |
| C00238 | Q84MS3 |
| C00238 | Q84MS4 |
| C00238 | Q84TI7 |
| C00238 | Q84YJ9 |
| C00238 | Q86WJ5 |
| C00238 | Q86WJ6 |
| C00238 | Q86Y85 |
| C00238 | Q87D01 |
| C00238 | Q87Y19 |
| C00238 | Q883V4 |
| C00238 | Q883V6 |
| C00238 | Q88FD7 |
| C00238 | Q88FD8 |
| C00238 | Q88NK7 |
| C00238 | Q88SV0 |
| C00238 | Q88Z42 |
| C00238 | Q89FC2 |
| C00238 | Q89FC4 |
| C00238 | Q89L53 |
| C00238 | Q89NN5 |
| C00238 | Q89NN6 |
| C00238 | Q8A519 |
| C00238 | Q8A521 |
| C00238 | Q8BQZ8 |
| C00238 | Q8BZN2 |
| C00238 | Q8C261 |
| C00238 | Q8CFS6 |
| C00238 | Q8CGQ8 |
| C00238 | Q8DHB0 |
| C00238 | Q8DZL1 |
| C00238 | Q8E575 |
| C00238 | Q8F1M1 |
| C00238 | Q8F1M2 |
| C00238 | Q8FZT8 |
| C00238 | Q8G6U3 |
| C00238 | Q8G7Q3 |
| C00238 | Q8GXE6 |
| C00238 | Q8H3P9 |
| C00238 | Q8JZN3 |
| C00238 | Q8K3F6 |
| C00238 | Q8KAT2 |

|        |        |
|--------|--------|
| C00238 | Q8KU73 |
| C00238 | Q8LBL1 |
| C00238 | Q8LPL8 |
| C00238 | Q8N538 |
| C00238 | Q8NCM2 |
| C00238 | Q8NFF2 |
| C00238 | Q8NSG3 |
| C00238 | Q8PHV1 |
| C00238 | Q8PPC8 |
| C00238 | Q8PPC9 |
| C00238 | Q8R1C0 |
| C00238 | Q8R1P5 |
| C00238 | Q8R8I5 |
| C00238 | Q8R8I6 |
| C00238 | Q8R8I7 |
| C00238 | Q8TAE7 |
| C00238 | Q8TDN1 |
| C00238 | Q8TDN2 |
| C00238 | Q8TL61 |
| C00238 | Q8U9D8 |
| C00238 | Q8U9D9 |
| C00238 | Q8U9E0 |
| C00238 | Q8UHH1 |
| C00238 | Q8UJL0 |
| C00238 | Q8VDN2 |
| C00238 | Q8VI23 |
| C00238 | Q8VXB1 |
| C00238 | Q8VXB5 |
| C00238 | Q8W4I4 |
| C00238 | Q8X878 |
| C00238 | Q8X9F8 |
| C00238 | Q8X9F9 |
| C00238 | Q8X9G0 |
| C00238 | Q8XA20 |
| C00238 | Q8XAW9 |
| C00238 | Q8XR16 |
| C00238 | Q8XU10 |
| C00238 | Q8XU11 |
| C00238 | Q8XU12 |
| C00238 | Q8XYY5 |
| C00238 | Q8Y3Z6 |
| C00238 | Q8Y3Z7 |
| C00238 | Q8Y3Z8 |
| C00238 | Q8YI23 |
| C00238 | Q8YPE8 |
| C00238 | Q8YPE9 |
| C00238 | Q8YPF1 |
| C00238 | Q8YSD5 |

|        |        |
|--------|--------|
| C00238 | Q8YSD7 |
| C00238 | Q8Z1Y7 |
| C00238 | Q8Z2R2 |
| C00238 | Q8Z8E4 |
| C00238 | Q8Z8E5 |
| C00238 | Q8Z8E6 |
| C00238 | Q8Z9K0 |
| C00238 | Q8ZD96 |
| C00238 | Q8ZD97 |
| C00238 | Q8ZD98 |
| C00238 | Q8ZJC4 |
| C00238 | Q8ZJT0 |
| C00238 | Q8ZKW1 |
| C00238 | Q8ZLL3 |
| C00238 | Q8ZQW1 |
| C00238 | Q8ZQW2 |
| C00238 | Q8ZQW3 |
| C00238 | Q8ZRW2 |
| C00238 | Q91V14 |
| C00238 | Q925Q3 |
| C00238 | Q927F9 |
| C00238 | Q927G0 |
| C00238 | Q927G1 |
| C00238 | Q92806 |
| C00238 | Q92952 |
| C00238 | Q92953 |
| C00238 | Q92RN0 |
| C00238 | Q92XJ0 |
| C00238 | Q92Y93 |
| C00238 | Q93235 |
| C00238 | Q942X8 |
| C00238 | Q94526 |
| C00238 | Q94A76 |
| C00238 | Q96KK3 |
| C00238 | Q96L42 |
| C00238 | Q96PR1 |
| C00238 | Q96RP8 |
| C00238 | Q96T54 |
| C00238 | Q96T55 |
| C00238 | Q97BF5 |
| C00238 | Q97BF6 |
| C00238 | Q97BF7 |
| C00238 | Q98GX5 |
| C00238 | Q98GX6 |
| C00238 | Q98GX7 |
| C00238 | Q98KL7 |
| C00238 | Q98KL8 |
| C00238 | Q99271 |

|        |        |
|--------|--------|
| C00238 | Q99712 |
| C00238 | Q99Z39 |
| C00238 | Q9A7X6 |
| C00238 | Q9A7X7 |
| C00238 | Q9A7X8 |
| C00238 | Q9ABT9 |
| C00238 | Q9BQ31 |
| C00238 | Q9CHU4 |
| C00238 | Q9CHU5 |
| C00238 | Q9EQR3 |
| C00238 | Q9FE38 |
| C00238 | Q9FL25 |
| C00238 | Q9FWX6 |
| C00238 | Q9FY75 |
| C00238 | Q9H252 |
| C00238 | Q9H2S1 |
| C00238 | Q9H2X9 |
| C00238 | Q9H3M0 |
| C00238 | Q9H427 |
| C00238 | Q9HB14 |
| C00238 | Q9HB15 |
| C00238 | Q9HC58 |
| C00238 | Q9I540 |
| C00238 | Q9JIS8 |
| C00238 | Q9JK45 |
| C00238 | Q9JK97 |
| C00238 | Q9JM63 |
| C00238 | Q9KM59 |
| C00238 | Q9L6L2 |
| C00238 | Q9LD18 |
| C00238 | Q9M7J9 |
| C00238 | Q9M7K4 |
| C00238 | Q9M8S6 |
| C00238 | Q9NPC2 |
| C00238 | Q9NPI9 |
| C00238 | Q9NR82 |
| C00238 | Q9NS40 |
| C00238 | Q9NSA2 |
| C00238 | Q9NYG8 |
| C00238 | Q9NZV8 |
| C00238 | Q9P1Z3 |
| C00238 | Q9P7I1 |
| C00238 | Q9PC78 |
| C00238 | Q9RZN6 |
| C00238 | Q9RZN7 |
| C00238 | Q9RZP0 |
| C00238 | Q9S6Z8 |
| C00238 | Q9SA05 |

|        |        |
|--------|--------|
| C00238 | Q9SCX5 |
| C00238 | Q9SVV6 |
| C00238 | Q9U6A0 |
| C00238 | Q9UGI6 |
| C00238 | Q9UHW9 |
| C00238 | Q9UI40 |
| C00238 | Q9UIX4 |
| C00238 | Q9UJ96 |
| C00238 | Q9UK17 |
| C00238 | Q9UL51 |
| C00238 | Q9ULD8 |
| C00238 | Q9ULS6 |
| C00238 | Q9UNX9 |
| C00238 | Q9UP95 |
| C00238 | Q9UQ05 |
| C00238 | Q9WVL3 |
| C00238 | Q9X8Z8 |
| C00238 | Q9X8Z9 |
| C00238 | Q9X900 |
| C00238 | Q9XFR0 |
| C00238 | Q9Y257 |
| C00238 | Q9Y2U2 |
| C00238 | Q9Y3Q4 |
| C00238 | Q9Y666 |
| C00238 | Q9Z0V1 |
| C00238 | Q9Z0V2 |
| C00238 | Q9Z2T1 |
| C00238 | Q9Z3Q3 |
| C00238 | Q9ZNG6 |
| C00241 | O05123 |
| C00242 | Q84MA8 |
| C00242 | Q9SRK7 |
| C00243 | A6MER5 |
| C00243 | A6MER6 |
| C00243 | A6MER7 |
| C00243 | O06980 |
| C00243 | O06981 |
| C00243 | O34697 |
| C00243 | O34741 |
| C00243 | O50295 |
| C00243 | O50296 |
| C00243 | O52853 |
| C00243 | P02920 |
| C00243 | P07921 |
| C00243 | P0A0D4 |
| C00243 | P0A0D6 |
| C00243 | P11162 |
| C00243 | P23936 |

|        |        |
|--------|--------|
| C00243 | P26426 |
| C00243 | P29822 |
| C00243 | P29823 |
| C00243 | P29824 |
| C00243 | P31675 |
| C00243 | P33026 |
| C00243 | P42423 |
| C00243 | P42424 |
| C00243 | P42953 |
| C00243 | P42954 |
| C00243 | P50976 |
| C00243 | Q01937 |
| C00243 | Q09IH8 |
| C00243 | Q09IH9 |
| C00243 | Q09II0 |
| C00243 | Q45404 |
| C00243 | Q45405 |
| C00243 | Q48597 |
| C00243 | Q48598 |
| C00243 | Q48599 |
| C00243 | Q5HE14 |
| C00243 | Q5HE15 |
| C00243 | Q5HM39 |
| C00243 | Q5HM40 |
| C00243 | Q75V13 |
| C00243 | Q75V14 |
| C00243 | Q75V15 |
| C00243 | Q7A2B0 |
| C00243 | Q8CNF6 |
| C00243 | Q8CNF7 |
| C00243 | Q8DQ76 |
| C00243 | Q8DQ77 |
| C00243 | Q8VUH1 |
| C00243 | Q8VUH2 |
| C00243 | Q8YT39 |
| C00243 | Q99S77 |
| C00243 | Q9F443 |
| C00243 | Q9F444 |
| C00243 | Q9S3K0 |
| C00244 | P22152 |
| C00244 | P38043 |
| C00244 | P38044 |
| C00244 | P38045 |
| C00244 | P38046 |
| C00244 | P42432 |
| C00244 | P73265 |
| C00244 | P73450 |
| C00244 | P73451 |



|        |        |
|--------|--------|
| C00244 | P73452 |
| C00244 | Q05085 |
| C00244 | Q39608 |
| C00244 | Q43390 |
| C00244 | Q44292 |
| C00244 | Q55108 |
| C00244 | Q55463 |
| C00244 | Q5HLK7 |
| C00244 | Q5MZ53 |
| C00244 | Q5MZ54 |
| C00244 | Q5MZ55 |
| C00244 | Q7A3U8 |
| C00244 | Q8CN76 |
| C00244 | Q9R6U5 |
| C00244 | Q9SWR8 |
| C00245 | B2RNU7 |
| C00245 | O35316 |
| C00245 | P31641 |
| C00245 | Q02SA6 |
| C00245 | Q1M7R4 |
| C00245 | Q2K164 |
| C00245 | Q47537 |
| C00245 | Q47538 |
| C00245 | Q47539 |
| C00245 | Q4FMG5 |
| C00245 | Q4KK16 |
| C00245 | Q5LVM5 |
| C00245 | Q62AW4 |
| C00245 | Q63JZ3 |
| C00245 | Q664P8 |
| C00245 | Q83MA0 |
| C00245 | Q87UH7 |
| C00245 | Q88RA1 |
| C00245 | Q8X5I6 |
| C00245 | Q8ZJD0 |
| C00245 | Q92UX0 |
| C00245 | Q98DW6 |
| C00245 | Q9HX79 |
| C00253 | O88750 |
| C00259 | P0AAF5 |
| C00259 | P0AE27 |
| C00259 | Q62GY9 |
| C00259 | Q63QQ7 |
| C00259 | Q65WJ1 |
| C00259 | Q6D4W8 |
| C00259 | Q83KP2 |
| C00259 | Q87FK7 |
| C00259 | Q882I8 |

|        |        |
|--------|--------|
| C00259 | Q8XVS2 |
| C00259 | Q9KEE7 |
| C00259 | Q9KEE9 |
| C00259 | Q9KEF0 |
| C00288 | A0L3E7 |
| C00288 | A2AJN7 |
| C00288 | O88343 |
| C00288 | P02730 |
| C00288 | P39660 |
| C00288 | P76460 |
| C00288 | Q2Y0W8 |
| C00288 | Q55027 |
| C00288 | Q55106 |
| C00288 | Q55107 |
| C00288 | Q55108 |
| C00288 | Q55460 |
| C00288 | Q55461 |
| C00288 | Q55462 |
| C00288 | Q55463 |
| C00288 | Q5DTL9 |
| C00288 | Q5MZ53 |
| C00288 | Q5MZ54 |
| C00288 | Q5MZ55 |
| C00288 | Q5MZ56 |
| C00288 | Q6U841 |
| C00288 | Q8JZR6 |
| C00288 | Q8NBS3 |
| C00288 | Q9BY07 |
| C00288 | Q9R1N3 |
| C00288 | Q9Y6M7 |
| C00288 | Q9Y6R1 |
| C00291 | P0AFA9 |
| C00291 | P0AFB0 |
| C00291 | P23516 |
| C00291 | P28795 |
| C00291 | P33590 |
| C00291 | P33591 |
| C00291 | P33593 |
| C00291 | P33594 |
| C00291 | P37617 |
| C00291 | P37972 |
| C00291 | P39642 |
| C00291 | Q07418 |
| C00291 | Q45247 |
| C00291 | Q48262 |
| C00291 | Q5KG96 |
| C00291 | Q83J77 |
| C00291 | Q83J78 |

|        |        |
|--------|--------|
| C00291 | Q88HL0 |
| C00291 | Q88HL1 |
| C00291 | Q8FVM9 |
| C00291 | Q8FVN0 |
| C00291 | Q8X4L6 |
| C00291 | Q8X5U1 |
| C00291 | Q8YCN7 |
| C00291 | Q8YCN8 |
| C00293 | A0PJK1 |
| C00293 | A0QZX3 |
| C00293 | A0ZXK6 |
| C00293 | A1Z264 |
| C00293 | A3M0N3 |
| C00293 | B1PM37 |
| C00293 | O05176 |
| C00293 | O05177 |
| C00293 | O07563 |
| C00293 | O23492 |
| C00293 | O25788 |
| C00293 | O52733 |
| C00293 | O74969 |
| C00293 | P0A283 |
| C00293 | P0A284 |
| C00293 | P0AAG8 |
| C00293 | P0AEE5 |
| C00293 | P0C105 |
| C00293 | P10870 |
| C00293 | P11166 |
| C00293 | P11168 |
| C00293 | P11169 |
| C00293 | P13181 |
| C00293 | P13866 |
| C00293 | P14142 |
| C00293 | P14246 |
| C00293 | P14672 |
| C00293 | P15729 |
| C00293 | P17809 |
| C00293 | P21906 |
| C00293 | P22732 |
| C00293 | P23200 |
| C00293 | P23586 |
| C00293 | P25548 |
| C00293 | P26379 |
| C00293 | P26380 |
| C00293 | P26381 |
| C00293 | P26382 |
| C00293 | P26430 |
| C00293 | P28288 |

|        |        |
|--------|--------|
| C00293 | P31636 |
| C00293 | P31639 |
| C00293 | P32037 |
| C00293 | P32568 |
| C00293 | P33302 |
| C00293 | P33897 |
| C00293 | P34230 |
| C00293 | P37439 |
| C00293 | P39816 |
| C00293 | P39924 |
| C00293 | P40550 |
| C00293 | P41820 |
| C00293 | P42833 |
| C00293 | P43071 |
| C00293 | P45338 |
| C00293 | P45618 |
| C00293 | P47315 |
| C00293 | P51533 |
| C00293 | P53048 |
| C00293 | P53403 |
| C00293 | P54862 |
| C00293 | P60857 |
| C00293 | P60944 |
| C00293 | P69783 |
| C00293 | P69785 |
| C00293 | P69786 |
| C00293 | P69788 |
| C00293 | P69797 |
| C00293 | P69801 |
| C00293 | P69805 |
| C00293 | P75569 |
| C00293 | P78577 |
| C00293 | P78595 |
| C00293 | P78831 |
| C00293 | P96169 |
| C00293 | Q01441 |
| C00293 | Q02785 |
| C00293 | Q05BQ3 |
| C00293 | Q06222 |
| C00293 | Q07647 |
| C00293 | Q12300 |
| C00293 | Q2M3M2 |
| C00293 | Q2MDH1 |
| C00293 | Q39228 |
| C00293 | Q44840 |
| C00293 | Q48WG5 |
| C00293 | Q50614 |
| C00293 | Q51485 |

|        |        |
|--------|--------|
| C00293 | Q53922 |
| C00293 | Q57071 |
| C00293 | Q5ERC7 |
| C00293 | Q5HD13 |
| C00293 | Q5HFZ9 |
| C00293 | Q5HJI3 |
| C00293 | Q5HL73 |
| C00293 | Q5HLZ2 |
| C00293 | Q5HPB5 |
| C00293 | Q5SWY8 |
| C00293 | Q5TF39 |
| C00293 | Q64L87 |
| C00293 | Q6PXP3 |
| C00293 | Q7A3G4 |
| C00293 | Q7A807 |
| C00293 | Q7CCJ4 |
| C00293 | Q814U8 |
| C00293 | Q816V0 |
| C00293 | Q81JY0 |
| C00293 | Q81KM7 |
| C00293 | Q89AG6 |
| C00293 | Q89B05 |
| C00293 | Q8BFW9 |
| C00293 | Q8C3K6 |
| C00293 | Q8CNF2 |
| C00293 | Q8CP79 |
| C00293 | Q8CZD5 |
| C00293 | Q8DS05 |
| C00293 | Q8G3X1 |
| C00293 | Q8IRI6 |
| C00293 | Q8K0E3 |
| C00293 | Q8K9J0 |
| C00293 | Q8KA51 |
| C00293 | Q8L6Z8 |
| C00293 | Q8LBP4 |
| C00293 | Q8TDB8 |
| C00293 | Q8VCV9 |
| C00293 | Q8VDT1 |
| C00293 | Q8VHD6 |
| C00293 | Q8VZR6 |
| C00293 | Q8WWX8 |
| C00293 | Q8X0Z3 |
| C00293 | Q8ZQ35 |
| C00293 | Q92253 |
| C00293 | Q923I7 |
| C00293 | Q94AZ2 |
| C00293 | Q94FB9 |
| C00293 | Q9AGA7 |

|        |        |
|--------|--------|
| C00293 | Q9BYW1 |
| C00293 | Q9C757 |
| C00293 | Q9FMX3 |
| C00293 | Q9JIF3 |
| C00293 | Q9KCQ4 |
| C00293 | Q9LNV3 |
| C00293 | Q9M9E1 |
| C00293 | Q9NRM0 |
| C00293 | Q9NY64 |
| C00293 | Q9NY91 |
| C00293 | Q9P3U6 |
| C00293 | Q9UGQ3 |
| C00293 | Q9XIE2 |
| C00296 | A1Z265 |
| C00296 | B1PLM1 |
| C00296 | P11636 |
| C00296 | Q5A8J5 |
| C00296 | Q926Q9 |
| C00296 | Q9NRM0 |
| C00299 | P05316 |
| C00299 | P38196 |
| C00300 | P48029 |
| C00300 | Q8VBW1 |
| C00302 | O00341 |
| C00302 | O30417 |
| C00302 | O35544 |
| C00302 | O75746 |
| C00302 | P0AAG3 |
| C00302 | P0AAG4 |
| C00302 | P0AER3 |
| C00302 | P0AER5 |
| C00302 | P0AER7 |
| C00302 | P0AER8 |
| C00302 | P0AER9 |
| C00302 | P21345 |
| C00302 | P24942 |
| C00302 | P24943 |
| C00302 | P31596 |
| C00302 | P37902 |
| C00302 | P43003 |
| C00302 | P43004 |
| C00302 | P43006 |
| C00302 | P45240 |
| C00302 | P48242 |
| C00302 | P48243 |
| C00302 | P48244 |
| C00302 | P48245 |
| C00302 | P48664 |

|        |        |
|--------|--------|
| C00302 | P51906 |
| C00302 | P53388 |
| C00302 | P56564 |
| C00302 | P58229 |
| C00302 | Q10901 |
| C00302 | Q3TXX4 |
| C00302 | Q52663 |
| C00302 | Q52664 |
| C00302 | Q52665 |
| C00302 | Q52666 |
| C00302 | Q8BFU8 |
| C00302 | Q8BH59 |
| C00302 | Q8BLE7 |
| C00302 | Q8NDX2 |
| C00302 | Q8RQL4 |
| C00302 | Q8RQL5 |
| C00302 | Q8RQL6 |
| C00302 | Q8RQL7 |
| C00302 | Q91WN3 |
| C00302 | Q9CG19 |
| C00302 | Q9D6M3 |
| C00302 | Q9DB41 |
| C00302 | Q9H1K4 |
| C00302 | Q9H936 |
| C00302 | Q9P2U7 |
| C00302 | Q9P2U8 |
| C00302 | Q9QXX4 |
| C00302 | Q9UPY5 |
| C00302 | Q9WTR6 |
| C00303 | P0AAE0 |
| C00303 | P0AEQ3 |
| C00303 | P0AEQ6 |
| C00303 | P0AEQ8 |
| C00303 | P0AEQ9 |
| C00303 | P10346 |
| C00303 | P25376 |
| C00303 | P28572 |
| C00303 | P30144 |
| C00303 | P48813 |
| C00303 | Q52663 |
| C00303 | Q52664 |
| C00303 | Q52665 |
| C00303 | Q52666 |
| C00303 | Q92J96 |
| C00303 | Q9A1H0 |
| C00303 | Q9A1H1 |
| C00304 | B7ZGM0 |
| C00304 | O82855 |

|        |        |
|--------|--------|
| C00304 | P31675 |
| C00304 | Q2G140 |
| C00304 | Q3V050 |
| C00304 | Q5I0E9 |
| C00304 | Q86VL8 |
| C00304 | Q8K0H1 |
| C00304 | Q945F0 |
| C00304 | Q96FL8 |
| C00304 | Q9I3Y3 |
| C00304 | Q9JV27 |
| C00305 | A3BV82 |
| C00305 | O25901 |
| C00305 | O34442 |
| C00305 | P0A2R8 |
| C00305 | P0A2R9 |
| C00305 | P0ABI6 |
| C00305 | P0ABI7 |
| C00305 | P28795 |
| C00305 | P36640 |
| C00305 | P40948 |
| C00305 | P44998 |
| C00305 | P55069 |
| C00305 | P87149 |
| C00305 | Q01926 |
| C00305 | Q02783 |
| C00305 | Q058N4 |
| C00305 | Q07418 |
| C00305 | Q0D2K0 |
| C00305 | Q0JBZ6 |
| C00305 | Q10D38 |
| C00305 | Q10S25 |
| C00305 | Q1PE39 |
| C00305 | Q2NQF9 |
| C00305 | Q304A0 |
| C00305 | Q45121 |
| C00305 | Q491Z9 |
| C00305 | Q58439 |
| C00305 | Q5KG96 |
| C00305 | Q5NCE8 |
| C00305 | Q65VT3 |
| C00305 | Q66FY7 |
| C00305 | Q67UQ7 |
| C00305 | Q6CZH4 |
| C00305 | Q6NVV3 |
| C00305 | Q7M9C0 |
| C00305 | Q7MYP0 |
| C00305 | Q7RTP0 |
| C00305 | Q7SFQ9 |



|        |        |
|--------|--------|
| C00305 | Q7VFJ7 |
| C00305 | Q7VN59 |
| C00305 | Q7VRM7 |
| C00305 | Q7XQQ1 |
| C00305 | Q830V1 |
| C00305 | Q8BHK1 |
| C00305 | Q8BJA2 |
| C00305 | Q8BMW7 |
| C00305 | Q8BYR8 |
| C00305 | Q8BZF2 |
| C00305 | Q8H1G7 |
| C00305 | Q8IVJ1 |
| C00305 | Q8L4S2 |
| C00305 | Q8N8Q9 |
| C00305 | Q8S1N1 |
| C00305 | Q8ZAG5 |
| C00305 | Q923J1 |
| C00305 | Q93ZD7 |
| C00305 | Q96JW4 |
| C00305 | Q96QT4 |
| C00305 | Q9AUK4 |
| C00305 | Q9BX84 |
| C00305 | Q9CLC4 |
| C00305 | Q9FLG2 |
| C00305 | Q9HD23 |
| C00305 | Q9JJC8 |
| C00305 | Q9LJN2 |
| C00305 | Q9LXD4 |
| C00305 | Q9PPI1 |
| C00305 | Q9S9N4 |
| C00305 | Q9SAH0 |
| C00305 | Q9WZ31 |
| C00305 | Q9ZPR4 |
| C00315 | A0LUE6 |
| C00315 | A3CMQ7 |
| C00315 | O51587 |
| C00315 | O83658 |
| C00315 | P0A2C7 |
| C00315 | P0A2C8 |
| C00315 | P0A2J7 |
| C00315 | P0A2J8 |
| C00315 | P0AFK4 |
| C00315 | P0AFK5 |
| C00315 | P0AFK6 |
| C00315 | P0AFK8 |
| C00315 | P0AFK9 |
| C00315 | P0AFL0 |
| C00315 | P40790 |

|        |        |
|--------|--------|
| C00315 | P44731 |
| C00315 | P45168 |
| C00315 | P45169 |
| C00315 | P45170 |
| C00315 | P45171 |
| C00315 | P47288 |
| C00315 | P47289 |
| C00315 | P47290 |
| C00315 | P69874 |
| C00315 | P69876 |
| C00315 | P69877 |
| C00315 | P75057 |
| C00315 | P75058 |
| C00315 | P75059 |
| C00315 | Q02R79 |
| C00315 | Q02Z10 |
| C00315 | Q03AH0 |
| C00315 | Q03JH1 |
| C00315 | Q03PF2 |
| C00315 | Q03ZQ0 |
| C00315 | Q042G7 |
| C00315 | Q04BG2 |
| C00315 | Q0AGF4 |
| C00315 | Q0I3Y9 |
| C00315 | Q0RAT5 |
| C00315 | Q0SML1 |
| C00315 | Q18AM3 |
| C00315 | Q2NK31 |
| C00315 | Q2SSS4 |
| C00315 | Q4K681 |
| C00315 | Q5FL41 |
| C00315 | Q5HGY5 |
| C00315 | Q5HQ70 |
| C00315 | Q5L222 |
| C00315 | Q5LT05 |
| C00315 | Q5LYN4 |
| C00315 | Q5ZWE4 |
| C00315 | Q60AI1 |
| C00315 | Q64SQ6 |
| C00315 | Q65UE1 |
| C00315 | Q660M8 |
| C00315 | Q6D4E2 |
| C00315 | Q6F0V4 |
| C00315 | Q6HLQ9 |
| C00315 | Q6KIP2 |
| C00315 | Q6LR20 |
| C00315 | Q6MCV4 |
| C00315 | Q6MU19 |

|        |        |
|--------|--------|
| C00315 | Q6YPR6 |
| C00315 | Q722B1 |
| C00315 | Q72FW5 |
| C00315 | Q74K65 |
| C00315 | Q7A679 |
| C00315 | Q7MKU3 |
| C00315 | Q7NB11 |
| C00315 | Q7VNG4 |
| C00315 | Q81GC1 |
| C00315 | Q81TH8 |
| C00315 | Q82TL6 |
| C00315 | Q830W6 |
| C00315 | Q83RR7 |
| C00315 | Q87PH3 |
| C00315 | Q88ZJ6 |
| C00315 | Q8A883 |
| C00315 | Q8CPN0 |
| C00315 | Q8D9J4 |
| C00315 | Q8DUF7 |
| C00315 | Q8DZJ0 |
| C00315 | Q8E554 |
| C00315 | Q8ELR4 |
| C00315 | Q8EUR3 |
| C00315 | Q8RI39 |
| C00315 | Q8XIZ5 |
| C00315 | Q8Y8T6 |
| C00315 | Q8YM92 |
| C00315 | Q8Z7H7 |
| C00315 | Q92DL6 |
| C00315 | Q97KS6 |
| C00315 | Q97Q42 |
| C00315 | Q98HF7 |
| C00315 | Q98QE1 |
| C00315 | Q99ZS8 |
| C00315 | Q9CGD4 |
| C00315 | Q9CP06 |
| C00315 | Q9HY19 |
| C00315 | Q9I6T2 |
| C00315 | Q9KS33 |
| C00315 | Q9PR37 |
| C00315 | Q9X196 |
| C00316 | P0C2U2 |
| C00316 | Q8X651 |
| C00318 | P0AFM2 |
| C00318 | P14175 |
| C00318 | P14176 |
| C00320 | P0AEB0 |
| C00320 | P0AG78 |

|        |        |
|--------|--------|
| C00320 | P16676 |
| C00320 | P16700 |
| C00320 | P16701 |
| C00320 | P32332 |
| C00320 | Q7N6Z2 |
| C00320 | Q8EBC3 |
| C00320 | Q8XBJ8 |
| C00334 | O35633 |
| C00334 | P30531 |
| C00334 | P31648 |
| C00334 | P31649 |
| C00334 | P32837 |
| C00334 | P48065 |
| C00334 | P48066 |
| C00334 | Q9H598 |
| C00334 | Q9NSD5 |
| C00334 | Q9VR07 |
| C00338 | Q15311 |
| C00338 | Q48475 |
| C00338 | Q48476 |
| C00342 | P0A742 |
| C00366 | Q07307 |
| C00366 | Q96S37 |
| C00370 | O15118 |
| C00370 | O35956 |
| C00370 | P61916 |
| C00370 | Q12200 |
| C00370 | Q60961 |
| C00370 | Q99PE8 |
| C00370 | Q9H221 |
| C00370 | Q9H222 |
| C00376 | P78363 |
| C00377 | O35956 |
| C00377 | P33302 |
| C00377 | P41820 |
| C00377 | P43505 |
| C00377 | P51533 |
| C00377 | Q51006 |
| C00377 | Q51073 |
| C00377 | Q9M9E1 |
| C00378 | O60779 |
| C00378 | P31548 |
| C00378 | P31549 |
| C00378 | P31550 |
| C00378 | P44984 |
| C00378 | P44985 |
| C00378 | P44986 |
| C00378 | Q05998 |

|        |        |
|--------|--------|
| C00378 | Q08579 |
| C00378 | Q0I354 |
| C00378 | Q0WJE4 |
| C00378 | Q2NVW9 |
| C00378 | Q57BC2 |
| C00378 | Q57BC3 |
| C00378 | Q57BC4 |
| C00378 | Q65SC9 |
| C00378 | Q6D0F3 |
| C00378 | Q7MPC5 |
| C00378 | Q7N8V0 |
| C00378 | Q7VP69 |
| C00378 | Q83MG3 |
| C00378 | Q87SV4 |
| C00378 | Q8FYU9 |
| C00378 | Q8FYV0 |
| C00378 | Q8FYV1 |
| C00378 | Q8UBY6 |
| C00378 | Q8XA06 |
| C00378 | Q8YJ02 |
| C00378 | Q8YJ03 |
| C00378 | Q8YJ04 |
| C00378 | Q8Z9I6 |
| C00378 | Q8ZRV2 |
| C00378 | Q92L31 |
| C00378 | Q98FA5 |
| C00378 | Q99PL8 |
| C00378 | Q9CNP9 |
| C00378 | Q9KP42 |
| C00380 | P0AA82 |
| C00380 | P17064 |
| C00380 | P40039 |
| C00380 | Q12119 |
| C00380 | Q8X691 |
| C00382 | O05176 |
| C00382 | O05177 |
| C00382 | P25548 |
| C00382 | P32568 |
| C00382 | P33302 |
| C00382 | P40550 |
| C00382 | P41820 |
| C00382 | P43071 |
| C00382 | P51533 |
| C00382 | P78577 |
| C00382 | P78595 |
| C00382 | Q02785 |
| C00382 | Q8X0Z3 |
| C00382 | Q9M9E1 |

|        |        |
|--------|--------|
| C00382 | Q9XIE2 |
| C00383 | O06931 |
| C00383 | O06932 |
| C00383 | O32715 |
| C00383 | P32332 |
| C00383 | P56949 |
| C00385 | P42086 |
| C00385 | Q07307 |
| C00392 | O30831 |
| C00392 | O30832 |
| C00392 | O30833 |
| C00392 | O53899 |
| C00392 | O65989 |
| C00392 | P00550 |
| C00392 | P0A0D8 |
| C00392 | P0ADC3 |
| C00392 | P27547 |
| C00392 | P32010 |
| C00392 | P32011 |
| C00392 | P46903 |
| C00392 | P46904 |
| C00392 | P54933 |
| C00392 | P69825 |
| C00392 | P69827 |
| C00392 | P75145 |
| C00392 | P75146 |
| C00392 | P75957 |
| C00392 | P75958 |
| C00392 | Q02420 |
| C00392 | Q2J9P4 |
| C00392 | Q2J9P5 |
| C00392 | Q4VWC6 |
| C00392 | Q4VWC7 |
| C00392 | Q4VWC8 |
| C00392 | Q4VWC9 |
| C00392 | Q4VWD0 |
| C00392 | Q53716 |
| C00392 | Q53717 |
| C00392 | Q5HE46 |
| C00392 | Q5HE48 |
| C00392 | Q70J75 |
| C00392 | Q70J76 |
| C00392 | Q7A4B3 |
| C00392 | Q7D911 |
| C00392 | Q89A36 |
| C00392 | Q8K911 |
| C00392 | Q9A1K4 |
| C00392 | Q9A1K5 |

|        |        |
|--------|--------|
| C00392 | Q9CIP5 |
| C00392 | Q9CIP6 |
| C00392 | Q9CLY8 |
| C00392 | Q9K678 |
| C00392 | Q9K680 |
| C00392 | Q9KJ75 |
| C00392 | Q9KKQ7 |
| C00395 | P0AE16 |
| C00413 | B7ZGM0 |
| C00413 | O82855 |
| C00413 | P31675 |
| C00413 | Q2G140 |
| C00413 | Q3V050 |
| C00413 | Q5I0E9 |
| C00413 | Q86VL8 |
| C00413 | Q8K0H1 |
| C00413 | Q945F0 |
| C00413 | Q96FL8 |
| C00413 | Q9I3Y3 |
| C00413 | Q9JV27 |
| C00420 | P18895 |
| C00420 | P32015 |
| C00420 | P32016 |
| C00420 | P43109 |
| C00420 | P43110 |
| C00455 | P52059 |
| C00473 | O70491 |
| C00474 | O52717 |
| C00486 | A8I268 |
| C00486 | O88750 |
| C00486 | Q7GB25 |
| C00486 | Q92887 |
| C00486 | Q9C8G9 |
| C00487 | O43772 |
| C00487 | O76082 |
| C00487 | P31553 |
| C00487 | P97521 |
| C00487 | Q12289 |
| C00487 | Q86VW1 |
| C00487 | Q8BL03 |
| C00487 | Q8N8R3 |
| C00487 | Q93XM7 |
| C00487 | Q9H015 |
| C00487 | Q9Z2Z6 |
| C00492 | A0L4K8 |
| C00492 | A0L4L0 |
| C00492 | A4YGY2 |
| C00492 | A8M8Z1 |

|        |        |
|--------|--------|
| C00492 | A8TDW7 |
| C00492 | A8TDX0 |
| C00492 | A9QDR6 |
| C00492 | A9QDR7 |
| C00492 | A9QDR8 |
| C00492 | O06989 |
| C00492 | O06990 |
| C00492 | O06991 |
| C00492 | O07009 |
| C00492 | O07011 |
| C00492 | O07330 |
| C00492 | O30489 |
| C00492 | O31710 |
| C00492 | O31711 |
| C00492 | O31712 |
| C00492 | O32261 |
| C00492 | P0A3G5 |
| C00492 | P16552 |
| C00492 | P36497 |
| C00492 | P43466 |
| C00492 | P50332 |
| C00492 | P50333 |
| C00492 | P68579 |
| C00492 | P75830 |
| C00492 | P75831 |
| C00492 | P94360 |
| C00492 | P96483 |
| C00492 | Q00564 |
| C00492 | Q00749 |
| C00492 | Q00750 |
| C00492 | Q00751 |
| C00492 | Q00752 |
| C00492 | Q03727 |
| C00492 | Q2SDB0 |
| C00492 | Q2SDB1 |
| C00492 | Q52899 |
| C00492 | Q52900 |
| C00492 | Q72H66 |
| C00492 | Q72H67 |
| C00492 | Q72H68 |
| C00492 | Q72KX2 |
| C00492 | Q72KX3 |
| C00492 | Q72KX4 |
| C00492 | Q72L52 |
| C00492 | Q73MJ2 |
| C00492 | Q73MJ3 |
| C00492 | Q73MJ4 |
| C00492 | Q7A3X3 |



|        |        |
|--------|--------|
| C00492 | Q7A7X2 |
| C00492 | Q7AUQ4 |
| C00492 | Q7WWQ6 |
| C00492 | Q7WWQ8 |
| C00492 | Q7WWQ9 |
| C00492 | Q7WWR0 |
| C00492 | Q8DNB9 |
| C00492 | Q8DNC0 |
| C00492 | Q8DT25 |
| C00492 | Q8DT26 |
| C00492 | Q8DT27 |
| C00492 | Q8DT28 |
| C00492 | Q8RKC0 |
| C00492 | Q8RKC1 |
| C00492 | Q8TM30 |
| C00492 | Q8TM31 |
| C00492 | Q93LN0 |
| C00492 | Q93LN1 |
| C00492 | Q973J4 |
| C00492 | Q9L026 |
| C00492 | Q9L027 |
| C00492 | Q9S5Y1 |
| C00492 | Q9X0S9 |
| C00492 | Q9X0T0 |
| C00492 | Q9X0T1 |
| C00492 | Q9X103 |
| C00492 | Q9X2F5 |
| C00492 | Q9X9R5 |
| C00492 | Q9X9R6 |
| C00492 | Q9X9R7 |
| C00493 | P76350 |
| C00499 | P15365 |
| C00504 | O45166 |
| C00504 | O60779 |
| C00504 | O76729 |
| C00504 | P41438 |
| C00504 | P41440 |
| C00504 | Q07492 |
| C00504 | Q17766 |
| C00504 | Q25272 |
| C00504 | Q54QN2 |
| C00504 | Q6PEM8 |
| C00504 | Q86I81 |
| C00504 | Q8BMG8 |
| C00504 | Q96NT5 |
| C00504 | Q9H2D1 |
| C00504 | Q9UAC2 |
| C00507 | B5XZ47 |

|        |        |
|--------|--------|
| C00507 | P27135 |
| C00507 | P39952 |
| C00507 | Q65Q27 |
| C00507 | Q66FF0 |
| C00507 | Q6DA13 |
| C00507 | Q83PD8 |
| C00507 | Q8X3T0 |
| C00507 | Q8Z2V6 |
| C00507 | Q8ZIZ8 |
| C00528 | P0AE16 |
| C00547 | P23975 |
| C00572 | Q96QT4 |
| C00638 | P28288 |
| C00638 | P34230 |
| C00698 | A6T4V9 |
| C00698 | A8K0U7 |
| C00698 | A8K7I4 |
| C00698 | A8MPY1 |
| C00698 | B5Y1L4 |
| C00698 | C9JAR3 |
| C00698 | O00168 |
| C00698 | O00299 |
| C00698 | O00591 |
| C00698 | O14764 |
| C00698 | O15247 |
| C00698 | O18276 |
| C00698 | O35454 |
| C00698 | O43511 |
| C00698 | O70496 |
| C00698 | O95833 |
| C00698 | P02730 |
| C00698 | P04919 |
| C00698 | P13569 |
| C00698 | P13808 |
| C00698 | P14867 |
| C00698 | P16102 |
| C00698 | P18505 |
| C00698 | P18507 |
| C00698 | P22723 |
| C00698 | P22933 |
| C00698 | P24046 |
| C00698 | P26048 |
| C00698 | P26049 |
| C00698 | P26361 |
| C00698 | P28472 |
| C00698 | P28476 |
| C00698 | P31641 |
| C00698 | P31644 |

|        |        |
|--------|--------|
| C00698 | P34903 |
| C00698 | P35523 |
| C00698 | P37020 |
| C00698 | P40879 |
| C00698 | P47869 |
| C00698 | P47870 |
| C00698 | P48169 |
| C00698 | P50571 |
| C00698 | P51788 |
| C00698 | P51790 |
| C00698 | P51791 |
| C00698 | P51793 |
| C00698 | P51795 |
| C00698 | P51798 |
| C00698 | P51800 |
| C00698 | P51801 |
| C00698 | P55011 |
| C00698 | P55014 |
| C00698 | P55017 |
| C00698 | P55018 |
| C00698 | P56475 |
| C00698 | P58244 |
| C00698 | P59585 |
| C00698 | P59638 |
| C00698 | P59639 |
| C00698 | P62812 |
| C00698 | P63080 |
| C00698 | P63137 |
| C00698 | P67730 |
| C00698 | P78334 |
| C00698 | P92941 |
| C00698 | P92942 |
| C00698 | P92943 |
| C00698 | Q08832 |
| C00698 | Q09573 |
| C00698 | Q13621 |
| C00698 | Q14802 |
| C00698 | Q14CN2 |
| C00698 | Q16445 |
| C00698 | Q17328 |
| C00698 | Q1ZXJ0 |
| C00698 | Q24352 |
| C00698 | Q43390 |
| C00698 | Q54AX6 |
| C00698 | Q54C67 |
| C00698 | Q54LQ4 |
| C00698 | Q64347 |
| C00698 | Q6PCC3 |

|        |        |
|--------|--------|
| C00698 | Q6PCD2 |
| C00698 | Q75JF3 |
| C00698 | Q7MDF0 |
| C00698 | Q86AZ6 |
| C00698 | Q87GZ9 |
| C00698 | Q8BG22 |
| C00698 | Q8BHB9 |
| C00698 | Q8BHJ7 |
| C00698 | Q8BXK9 |
| C00698 | Q8GX93 |
| C00698 | Q8N1C3 |
| C00698 | Q8QZW7 |
| C00698 | Q8RXR2 |
| C00698 | Q8VI23 |
| C00698 | Q8X794 |
| C00698 | Q8Z4X8 |
| C00698 | Q8Z6Y0 |
| C00698 | Q8Z9B3 |
| C00698 | Q8ZBM0 |
| C00698 | Q8ZPK5 |
| C00698 | Q8ZRP8 |
| C00698 | Q91V14 |
| C00698 | Q93IM6 |
| C00698 | Q96282 |
| C00698 | Q96NY7 |
| C00698 | Q99928 |
| C00698 | Q9BXP2 |
| C00698 | Q9D6F4 |
| C00698 | Q9D7P7 |
| C00698 | Q9D7Z6 |
| C00698 | Q9H2X9 |
| C00698 | Q9JIS8 |
| C00698 | Q9JLF1 |
| C00698 | Q9KM62 |
| C00698 | Q9NZA1 |
| C00698 | Q9QYB1 |
| C00698 | Q9R0A1 |
| C00698 | Q9R155 |
| C00698 | Q9UHW9 |
| C00698 | Q9UN88 |
| C00698 | Q9UP95 |
| C00698 | Q9UQC9 |
| C00698 | Q9WUB7 |
| C00698 | Q9WVC8 |
| C00698 | Q9WVD4 |
| C00698 | Q9WVL3 |
| C00698 | Q9Y666 |
| C00698 | Q9Y696 |

|        |        |
|--------|--------|
| C00698 | Q9Z1Q5 |
| C00701 | Q60961 |
| C00706 | O02713 |
| C00706 | O35956 |
| C00706 | O76082 |
| C00706 | Q5RLM2 |
| C00706 | Q63089 |
| C00706 | Q80UJ1 |
| C00706 | Q86VW1 |
| C00706 | Q8CFZ5 |
| C00706 | Q8IVM8 |
| C00706 | Q96S37 |
| C00706 | Q9CAT6 |
| C00706 | Q9H015 |
| C00706 | Q9NSA0 |
| C00706 | Q9R0W2 |
| C00706 | Q9Y226 |
| C00708 | Q8N695 |
| C00708 | Q92911 |
| C00711 | P50537 |
| C00711 | Q02978 |
| C00711 | Q48797 |
| C00711 | Q53787 |
| C00711 | Q54PY7 |
| C00711 | Q8LG88 |
| C00711 | Q9CR62 |
| C00716 | A6TAU9 |
| C00716 | A6TEC8 |
| C00716 | A7I2B9 |
| C00716 | B5XTX0 |
| C00716 | B5XVZ7 |
| C00716 | P0AAD6 |
| C00716 | P0AAD7 |
| C00716 | P0AAD9 |
| C00716 | P0AAE0 |
| C00716 | P0AGE4 |
| C00716 | P44615 |
| C00716 | Q02LI9 |
| C00716 | Q07ZL7 |
| C00716 | Q0I455 |
| C00716 | Q0WJ82 |
| C00716 | Q5F5G9 |
| C00716 | Q5M1F4 |
| C00716 | Q83Q28 |
| C00716 | Q83QD0 |
| C00716 | Q8ZLW1 |
| C00719 | O32243 |
| C00719 | O34742 |

|        |        |
|--------|--------|
| C00719 | O34878 |
| C00719 | O34992 |
| C00719 | O76082 |
| C00719 | P0AFM2 |
| C00719 | P0C0L7 |
| C00719 | P0C0L8 |
| C00719 | P14175 |
| C00719 | P14176 |
| C00719 | P40862 |
| C00719 | P43007 |
| C00719 | P46920 |
| C00719 | P46921 |
| C00719 | P46922 |
| C00719 | P48065 |
| C00719 | P54417 |
| C00719 | Q5HRH0 |
| C00719 | Q79VE0 |
| C00719 | Q7A771 |
| C00719 | Q87WH3 |
| C00719 | Q87WH4 |
| C00719 | Q87WH5 |
| C00719 | Q8Q040 |
| C00719 | Q8Q041 |
| C00719 | Q8Q042 |
| C00719 | Q8Q043 |
| C00719 | Q9HTH6 |
| C00719 | Q9HTI6 |
| C00719 | Q9HTI7 |
| C00719 | Q9HTI8 |
| C00725 | O70247 |
| C00735 | O15118 |
| C00735 | P61916 |
| C00735 | Q12200 |
| C00738 | O04249 |
| C00738 | O82390 |
| C00738 | P0AA78 |
| C00738 | P0AGC0 |
| C00738 | P0AGC1 |
| C00738 | P0AGC2 |
| C00738 | P15686 |
| C00738 | P32466 |
| C00738 | P32467 |
| C00738 | P38695 |
| C00738 | P39003 |
| C00738 | P39004 |
| C00738 | P39924 |
| C00738 | P40885 |
| C00738 | P40886 |

|        |        |
|--------|--------|
| C00738 | P42833 |
| C00738 | P43581 |
| C00738 | P47185 |
| C00738 | P53631 |
| C00738 | P54854 |
| C00738 | Q01441 |
| C00738 | Q07YH1 |
| C00738 | Q12235 |
| C00738 | Q8BFU8 |
| C00738 | Q8GW61 |
| C00738 | Q8L7R8 |
| C00738 | Q93Y91 |
| C00738 | Q94AZ2 |
| C00738 | Q9BYT1 |
| C00738 | Q9FMX3 |
| C00738 | Q9LNV3 |
| C00738 | Q9SBA7 |
| C00738 | Q9SX48 |
| C00738 | Q9Y2C5 |
| C00738 | Q9Z7N9 |
| C00740 | P0AAE1 |
| C00767 | O13880 |
| C00767 | O43000 |
| C00767 | P25621 |
| C00767 | P42237 |
| C00767 | P53241 |
| C00767 | P53322 |
| C00767 | Q62634 |
| C00767 | Q7YQJ7 |
| C00767 | Q8FDB7 |
| C00767 | Q9JI12 |
| C00767 | Q9NRA2 |
| C00768 | A1VZQ3 |
| C00768 | A3ZI83 |
| C00768 | O30506 |
| C00768 | O31199 |
| C00768 | O34315 |
| C00768 | O34406 |
| C00768 | O34852 |
| C00768 | O34900 |
| C00768 | O34931 |
| C00768 | O50181 |
| C00768 | O50182 |
| C00768 | O50183 |
| C00768 | P02910 |
| C00768 | P02915 |
| C00768 | P06775 |
| C00768 | P09551 |

|        |        |
|--------|--------|
| C00768 | P0A2I7 |
| C00768 | P0A2I8 |
| C00768 | P0A2I9 |
| C00768 | P0A2J0 |
| C00768 | P0AEM9 |
| C00768 | P0AEU2 |
| C00768 | P0AEU5 |
| C00768 | P0AEU6 |
| C00768 | P0AFT2 |
| C00768 | P0AG34 |
| C00768 | P32487 |
| C00768 | P37774 |
| C00768 | P38090 |
| C00768 | P38971 |
| C00768 | P39456 |
| C00768 | P42087 |
| C00768 | P42199 |
| C00768 | P42200 |
| C00768 | P43548 |
| C00768 | P46032 |
| C00768 | P46349 |
| C00768 | P53388 |
| C00768 | P54535 |
| C00768 | P54536 |
| C00768 | P54537 |
| C00768 | P73544 |
| C00768 | P73721 |
| C00768 | Q03770 |
| C00768 | Q08986 |
| C00768 | Q0P9X8 |
| C00768 | Q12372 |
| C00768 | Q43390 |
| C00768 | Q88NY2 |
| C00768 | Q88NY3 |
| C00768 | Q88NY4 |
| C00768 | Q88NY5 |
| C00768 | Q8IY34 |
| C00768 | Q8J266 |
| C00768 | Q8N697 |
| C00768 | Q8NKC4 |
| C00768 | Q8YPM7 |
| C00768 | Q8YPM8 |
| C00768 | Q8YPM9 |
| C00768 | Q8YSA2 |
| C00768 | Q91W98 |
| C00768 | Q9HZS1 |
| C00770 | P39344 |
| C00780 | P31645 |



|        |        |
|--------|--------|
| C00780 | P51905 |
| C00780 | Q5EE02 |
| C00794 | P59784 |
| C00801 | O00337 |
| C00801 | O32115 |
| C00801 | O43868 |
| C00801 | P0A927 |
| C00801 | P0AFF2 |
| C00801 | P0AFF4 |
| C00801 | P26430 |
| C00801 | P36051 |
| C00801 | P39141 |
| C00801 | Q14542 |
| C00801 | Q60961 |
| C00801 | Q62674 |
| C00801 | Q62773 |
| C00801 | Q99808 |
| C00801 | Q99P65 |
| C00801 | Q9JIM1 |
| C00801 | Q9UA35 |
| C00806 | O50649 |
| C00806 | P0AAD2 |
| C00806 | P0AAD3 |
| C00806 | P23173 |
| C00806 | P38085 |
| C00806 | P38967 |
| C00806 | P44614 |
| C00806 | Q8XB33 |
| C00855 | P31728 |
| C00855 | P44785 |
| C00855 | P63356 |
| C00855 | Q0I5E9 |
| C00855 | Q2NRN5 |
| C00855 | Q65VG9 |
| C00855 | Q667L9 |
| C00855 | Q6D1C4 |
| C00855 | Q6LN52 |
| C00855 | Q7MN25 |
| C00855 | Q7N8M2 |
| C00855 | Q7VM95 |
| C00855 | Q83MC5 |
| C00855 | Q87RS1 |
| C00855 | Q8DFC3 |
| C00855 | Q8X800 |
| C00855 | Q8X8V9 |
| C00855 | Q8Z990 |
| C00855 | Q8Z992 |
| C00855 | Q8ZH38 |

|        |        |
|--------|--------|
| C00855 | Q8ZH39 |
| C00855 | Q8ZH40 |
| C00864 | P25621 |
| C00864 | P44963 |
| C00865 | O35600 |
| C00865 | P02730 |
| C00865 | P08183 |
| C00865 | P40527 |
| C00865 | Q12675 |
| C00865 | Q91V24 |
| C00898 | P39414 |
| C00898 | P70786 |
| C00918 | O94528 |
| C00918 | P0A4K4 |
| C00918 | P31141 |
| C00918 | P32482 |
| C00918 | P39843 |
| C00918 | P40474 |
| C00918 | P53389 |
| C00918 | P53943 |
| C00918 | Q45RG2 |
| C00918 | Q56RY7 |
| C00918 | Q5JAK9 |
| C00918 | Q5SR56 |
| C00918 | Q5WX21 |
| C00930 | P22340 |
| C00934 | P0AGC0 |
| C01019 | A1S297 |
| C01019 | A1S5F4 |
| C01019 | P11551 |
| C01019 | P44776 |
| C01019 | Q07XD1 |
| C01021 | P15993 |
| C01021 | P59737 |
| C01021 | Q3U9N9 |
| C01021 | Q8X968 |
| C01074 | Q9KIQ2 |
| C01074 | Q9KIQ3 |
| C01074 | Q9KIQ4 |
| C01083 | A3MWP1 |
| C01083 | A3MWP2 |
| C01083 | A8F6Z4 |
| C01083 | B0K2P2 |
| C01083 | B0K2P3 |
| C01083 | B1L0U0 |
| C01083 | B1L0U1 |
| C01083 | O31427 |
| C01083 | O31428 |

|        |        |
|--------|--------|
| C01083 | O32748 |
| C01083 | O51923 |
| C01083 | O51924 |
| C01083 | O51925 |
| C01083 | P0ABM0 |
| C01083 | P0ABM7 |
| C01083 | P18767 |
| C01083 | P30963 |
| C01083 | P30964 |
| C01083 | P36672 |
| C01083 | P93280 |
| C01083 | P97046 |
| C01083 | Q07638 |
| C01083 | Q07639 |
| C01083 | Q6KYW8 |
| C01083 | Q6KYW9 |
| C01083 | Q8XE58 |
| C01083 | Q9C8T1 |
| C01083 | Q9X2W0 |
| C01083 | Q9Z3R5 |
| C01083 | Q9Z3R6 |
| C01083 | Q9Z3R7 |
| C01319 | Q54464 |
| C01319 | Q6UP69 |
| C01319 | Q6UP70 |
| C01328 | P10861 |
| C01328 | P12234 |
| C01330 | A0KG33 |
| C01330 | A0KL02 |
| C01330 | A0KL08 |
| C01330 | A0LLE6 |
| C01330 | A0M0N2 |
| C01330 | A0PJK1 |
| C01330 | A0QW18 |
| C01330 | A1R4H0 |
| C01330 | A2RUN4 |
| C01330 | A3KLL5 |
| C01330 | A4IVT5 |
| C01330 | A5VNX4 |
| C01330 | A5X2V1 |
| C01330 | A6Q0Z0 |
| C01330 | A6T4F6 |
| C01330 | A6TAW7 |
| C01330 | A6TEC8 |
| C01330 | A6TFD1 |
| C01330 | A6TGZ7 |
| C01330 | A6TJ58 |
| C01330 | A6UH53 |

|        |        |
|--------|--------|
| C01330 | A7HZF9 |
| C01330 | A7I1I1 |
| C01330 | A7I2B9 |
| C01330 | A8EUK5 |
| C01330 | A8EVL5 |
| C01330 | A8I126 |
| C01330 | A8IDZ2 |
| C01330 | B1PS44 |
| C01330 | B2R812 |
| C01330 | B2RNU7 |
| C01330 | B4DX48 |
| C01330 | B5XN31 |
| C01330 | B5XQ77 |
| C01330 | B5XTX0 |
| C01330 | B5XXT7 |
| C01330 | B9K2V4 |
| C01330 | C9JBG3 |
| C01330 | D3DPL4 |
| C01330 | D3DTQ2 |
| C01330 | D3DVE4 |
| C01330 | O00337 |
| C01330 | O00341 |
| C01330 | O00476 |
| C01330 | O00624 |
| C01330 | O01635 |
| C01330 | O02228 |
| C01330 | O02713 |
| C01330 | O06923 |
| C01330 | O06924 |
| C01330 | O06925 |
| C01330 | O06926 |
| C01330 | O06927 |
| C01330 | O06930 |
| C01330 | O06931 |
| C01330 | O06932 |
| C01330 | O16452 |
| C01330 | O26076 |
| C01330 | O27598 |
| C01330 | O27599 |
| C01330 | O27600 |
| C01330 | O27601 |
| C01330 | O32212 |
| C01330 | O35055 |
| C01330 | O35316 |
| C01330 | O35544 |
| C01330 | O35874 |
| C01330 | O35956 |
| C01330 | O43868 |

|        |        |
|--------|--------|
| C01330 | O50649 |
| C01330 | O60721 |
| C01330 | O60779 |
| C01330 | O61365 |
| C01330 | O66163 |
| C01330 | O70247 |
| C01330 | O76082 |
| C01330 | O76689 |
| C01330 | O82390 |
| C01330 | O85187 |
| C01330 | O88343 |
| C01330 | O88575 |
| C01330 | O88576 |
| C01330 | O88703 |
| C01330 | O88704 |
| C01330 | O88705 |
| C01330 | O95436 |
| C01330 | P05023 |
| C01330 | P05026 |
| C01330 | P07117 |
| C01330 | P09131 |
| C01330 | P0A2F8 |
| C01330 | P0A2F9 |
| C01330 | P0AE74 |
| C01330 | P0AER8 |
| C01330 | P0AER9 |
| C01330 | P0AFA7 |
| C01330 | P0AFA8 |
| C01330 | P0AFC3 |
| C01330 | P0AFC7 |
| C01330 | P0AFD1 |
| C01330 | P0AFD4 |
| C01330 | P0AFD6 |
| C01330 | P0AFE0 |
| C01330 | P0AFE4 |
| C01330 | P0AFE8 |
| C01330 | P0AFF0 |
| C01330 | P0AFU3 |
| C01330 | P0AGE4 |
| C01330 | P0AGE5 |
| C01330 | P0COL7 |
| C01330 | P10502 |
| C01330 | P13587 |
| C01330 | P13637 |
| C01330 | P13738 |
| C01330 | P13866 |
| C01330 | P14094 |
| C01330 | P14231 |

|        |        |
|--------|--------|
| C01330 | P14415 |
| C01330 | P16256 |
| C01330 | P19072 |
| C01330 | P19634 |
| C01330 | P20672 |
| C01330 | P21129 |
| C01330 | P21608 |
| C01330 | P21903 |
| C01330 | P21904 |
| C01330 | P21905 |
| C01330 | P23975 |
| C01330 | P24585 |
| C01330 | P24942 |
| C01330 | P24943 |
| C01330 | P25185 |
| C01330 | P26235 |
| C01330 | P26430 |
| C01330 | P26435 |
| C01330 | P27611 |
| C01330 | P28570 |
| C01330 | P28571 |
| C01330 | P28572 |
| C01330 | P28573 |
| C01330 | P29706 |
| C01330 | P29707 |
| C01330 | P29708 |
| C01330 | P29709 |
| C01330 | P29710 |
| C01330 | P30144 |
| C01330 | P30145 |
| C01330 | P30531 |
| C01330 | P31596 |
| C01330 | P31602 |
| C01330 | P31636 |
| C01330 | P31639 |
| C01330 | P31641 |
| C01330 | P31645 |
| C01330 | P31648 |
| C01330 | P31649 |
| C01330 | P31661 |
| C01330 | P31979 |
| C01330 | P32739 |
| C01330 | P33599 |
| C01330 | P33602 |
| C01330 | P33607 |
| C01330 | P34315 |
| C01330 | P34322 |
| C01330 | P34644 |

|        |        |
|--------|--------|
| C01330 | P35449 |
| C01330 | P35498 |
| C01330 | P35499 |
| C01330 | P36606 |
| C01330 | P37088 |
| C01330 | P39141 |
| C01330 | P41438 |
| C01330 | P43003 |
| C01330 | P43004 |
| C01330 | P43005 |
| C01330 | P43006 |
| C01330 | P43007 |
| C01330 | P43436 |
| C01330 | P43437 |
| C01330 | P43439 |
| C01330 | P43455 |
| C01330 | P43456 |
| C01330 | P43457 |
| C01330 | P44581 |
| C01330 | P44706 |
| C01330 | P44963 |
| C01330 | P45174 |
| C01330 | P45240 |
| C01330 | P45246 |
| C01330 | P46903 |
| C01330 | P46904 |
| C01330 | P48029 |
| C01330 | P48065 |
| C01330 | P48066 |
| C01330 | P48067 |
| C01330 | P48664 |
| C01330 | P48764 |
| C01330 | P50334 |
| C01330 | P50992 |
| C01330 | P50993 |
| C01330 | P51164 |
| C01330 | P51168 |
| C01330 | P51170 |
| C01330 | P51172 |
| C01330 | P51905 |
| C01330 | P51906 |
| C01330 | P51912 |
| C01330 | P53794 |
| C01330 | P54104 |
| C01330 | P54709 |
| C01330 | P54710 |
| C01330 | P55011 |
| C01330 | P55012 |

|        |        |
|--------|--------|
| C01330 | P55014 |
| C01330 | P55017 |
| C01330 | P55018 |
| C01330 | P56564 |
| C01330 | P57103 |
| C01330 | P58734 |
| C01330 | P60675 |
| C01330 | P60677 |
| C01330 | P60678 |
| C01330 | P60681 |
| C01330 | P60682 |
| C01330 | P60685 |
| C01330 | P60686 |
| C01330 | P60689 |
| C01330 | P60690 |
| C01330 | P60693 |
| C01330 | P60694 |
| C01330 | P60697 |
| C01330 | P60698 |
| C01330 | P70172 |
| C01330 | P70414 |
| C01330 | P78348 |
| C01330 | P80183 |
| C01330 | P80184 |
| C01330 | P80185 |
| C01330 | P80186 |
| C01330 | P80187 |
| C01330 | P96169 |
| C01330 | P97370 |
| C01330 | Q01118 |
| C01330 | Q01896 |
| C01330 | Q01959 |
| C01330 | Q02563 |
| C01330 | Q02KW3 |
| C01330 | Q02LI9 |
| C01330 | Q02UV9 |
| C01330 | Q03030 |
| C01330 | Q03031 |
| C01330 | Q03032 |
| C01330 | Q03614 |
| C01330 | Q03MC5 |
| C01330 | Q04121 |
| C01330 | Q04646 |
| C01330 | Q06495 |
| C01330 | Q06496 |
| C01330 | Q06700 |
| C01330 | Q07782 |
| C01330 | Q07YY4 |



|        |        |
|--------|--------|
| C01330 | Q07ZL7 |
| C01330 | Q083H3 |
| C01330 | Q09274 |
| C01330 | Q0AM65 |
| C01330 | Q0BSV4 |
| C01330 | Q0BW71 |
| C01330 | Q0I3A2 |
| C01330 | Q0I455 |
| C01330 | Q0KEX1 |
| C01330 | Q0P7X3 |
| C01330 | Q0P7X4 |
| C01330 | Q0RG46 |
| C01330 | Q0RHS2 |
| C01330 | Q0RPD5 |
| C01330 | Q0VQ74 |
| C01330 | Q0WJ82 |
| C01330 | Q11TX2 |
| C01330 | Q12691 |
| C01330 | Q12908 |
| C01330 | Q13183 |
| C01330 | Q13621 |
| C01330 | Q13733 |
| C01330 | Q14916 |
| C01330 | Q14940 |
| C01330 | Q14973 |
| C01330 | Q15758 |
| C01330 | Q16515 |
| C01330 | Q1EHB4 |
| C01330 | Q1LFB1 |
| C01330 | Q1LRW2 |
| C01330 | Q1MDR5 |
| C01330 | Q21974 |
| C01330 | Q22851 |
| C01330 | Q24046 |
| C01330 | Q24048 |
| C01330 | Q25011 |
| C01330 | Q2FMC1 |
| C01330 | Q2K5Z8 |
| C01330 | Q2KCN1 |
| C01330 | Q2M3M2 |
| C01330 | Q2NVY9 |
| C01330 | Q2RY62 |
| C01330 | Q2Y0W8 |
| C01330 | Q30PM3 |
| C01330 | Q39510 |
| C01330 | Q3A1R2 |
| C01330 | Q3A4S1 |
| C01330 | Q3KNW5 |

|        |        |
|--------|--------|
| C01330 | Q3SNN8 |
| C01330 | Q3UEZ8 |
| C01330 | Q3YL57 |
| C01330 | Q3ZCW7 |
| C01330 | Q41515 |
| C01330 | Q43390 |
| C01330 | Q44659 |
| C01330 | Q44660 |
| C01330 | Q47BQ7 |
| C01330 | Q47I87 |
| C01330 | Q485F0 |
| C01330 | Q48769 |
| C01330 | Q49B93 |
| C01330 | Q4FLX6 |
| C01330 | Q4G0N8 |
| C01330 | Q4K9I6 |
| C01330 | Q4KBY6 |
| C01330 | Q4KH68 |
| C01330 | Q4VAM4 |
| C01330 | Q4ZJI4 |
| C01330 | Q50773 |
| C01330 | Q50774 |
| C01330 | Q52978 |
| C01330 | Q52980 |
| C01330 | Q52981 |
| C01330 | Q52982 |
| C01330 | Q52983 |
| C01330 | Q552S0 |
| C01330 | Q56582 |
| C01330 | Q56584 |
| C01330 | Q56586 |
| C01330 | Q56587 |
| C01330 | Q56589 |
| C01330 | Q56724 |
| C01330 | Q56725 |
| C01330 | Q56EB3 |
| C01330 | Q56XP4 |
| C01330 | Q57079 |
| C01330 | Q57095 |
| C01330 | Q57111 |
| C01330 | Q57286 |
| C01330 | Q57490 |
| C01330 | Q58I19 |
| C01330 | Q59574 |
| C01330 | Q59575 |
| C01330 | Q59576 |
| C01330 | Q59577 |
| C01330 | Q59578 |

|        |        |
|--------|--------|
| C01330 | Q59579 |
| C01330 | Q59580 |
| C01330 | Q59584 |
| C01330 | Q5DTL9 |
| C01330 | Q5EE02 |
| C01330 | Q5F5G9 |
| C01330 | Q5FNE6 |
| C01330 | Q5HEK4 |
| C01330 | Q5HEM0 |
| C01330 | Q5HHD3 |
| C01330 | Q5HHD4 |
| C01330 | Q5HHD5 |
| C01330 | Q5HHD6 |
| C01330 | Q5HHD7 |
| C01330 | Q5HHD8 |
| C01330 | Q5HHD9 |
| C01330 | Q5HN32 |
| C01330 | Q5HQL0 |
| C01330 | Q5HQL1 |
| C01330 | Q5HQL2 |
| C01330 | Q5HQL3 |
| C01330 | Q5HQL4 |
| C01330 | Q5HQL5 |
| C01330 | Q5HQL6 |
| C01330 | Q5M1F4 |
| C01330 | Q5NCM1 |
| C01330 | Q5NE91 |
| C01330 | Q5NRB1 |
| C01330 | Q5PT53 |
| C01330 | Q5PT54 |
| C01330 | Q5PT55 |
| C01330 | Q5SWY8 |
| C01330 | Q5SZA1 |
| C01330 | Q5U4D8 |
| C01330 | Q5Z2Z5 |
| C01330 | Q61165 |
| C01330 | Q61180 |
| C01330 | Q61327 |
| C01330 | Q61983 |
| C01330 | Q62674 |
| C01330 | Q62773 |
| C01330 | Q63089 |
| C01330 | Q64T76 |
| C01330 | Q65M31 |
| C01330 | Q65RK2 |
| C01330 | Q65UC1 |
| C01330 | Q65VH3 |
| C01330 | Q665P2 |

|        |        |
|--------|--------|
| C01330 | Q66AQ9 |
| C01330 | Q66ES8 |
| C01330 | Q66FN0 |
| C01330 | Q67BT3 |
| C01330 | Q68KI4 |
| C01330 | Q695T7 |
| C01330 | Q6AB77 |
| C01330 | Q6AI14 |
| C01330 | Q6AQH5 |
| C01330 | Q6AS08 |
| C01330 | Q6D0B9 |
| C01330 | Q6D4M9 |
| C01330 | Q6D913 |
| C01330 | Q6D9G4 |
| C01330 | Q6FB65 |
| C01330 | Q6G0H9 |
| C01330 | Q6G5K1 |
| C01330 | Q6J4K2 |
| C01330 | Q6LG82 |
| C01330 | Q6LNY8 |
| C01330 | Q6LUL9 |
| C01330 | Q6NXK8 |
| C01330 | Q6PGE7 |
| C01330 | Q6PIE5 |
| C01330 | Q6QIY3 |
| C01330 | Q6U841 |
| C01330 | Q6X1Y6 |
| C01330 | Q71RS6 |
| C01330 | Q74AP9 |
| C01330 | Q74U12 |
| C01330 | Q7A4P8 |
| C01330 | Q7A4Q7 |
| C01330 | Q7CG77 |
| C01330 | Q7M922 |
| C01330 | Q7MGA3 |
| C01330 | Q7MLJ3 |
| C01330 | Q7N0A2 |
| C01330 | Q7N3Z4 |
| C01330 | Q7N8X6 |
| C01330 | Q7NA72 |
| C01330 | Q7TNS7 |
| C01330 | Q7UTY3 |
| C01330 | Q7VFN0 |
| C01330 | Q7VFN1 |
| C01330 | Q7VKY3 |
| C01330 | Q7VLY3 |
| C01330 | Q7VN39 |
| C01330 | Q7W1Y0 |

|        |        |
|--------|--------|
| C01330 | Q7WQV8 |
| C01330 | Q7XPF8 |
| C01330 | Q82EL6 |
| C01330 | Q82ZN5 |
| C01330 | Q83N58 |
| C01330 | Q83P94 |
| C01330 | Q83Q34 |
| C01330 | Q83RQ5 |
| C01330 | Q83SR3 |
| C01330 | Q84WG1 |
| C01330 | Q86UD5 |
| C01330 | Q86VS0 |
| C01330 | Q86YT5 |
| C01330 | Q87FP8 |
| C01330 | Q87N04 |
| C01330 | Q87UW8 |
| C01330 | Q87WL3 |
| C01330 | Q88FQ6 |
| C01330 | Q88K49 |
| C01330 | Q88NS2 |
| C01330 | Q8BG16 |
| C01330 | Q8BGY9 |
| C01330 | Q8BJI1 |
| C01330 | Q8BLV3 |
| C01330 | Q8BUE1 |
| C01330 | Q8BYF6 |
| C01330 | Q8BZ00 |
| C01330 | Q8C0X2 |
| C01330 | Q8C261 |
| C01330 | Q8C3K6 |
| C01330 | Q8CGQ8 |
| C01330 | Q8CNP2 |
| C01330 | Q8CPU8 |
| C01330 | Q8CPU9 |
| C01330 | Q8CPV0 |
| C01330 | Q8CPV1 |
| C01330 | Q8CPV2 |
| C01330 | Q8CPV3 |
| C01330 | Q8CPV4 |
| C01330 | Q8D666 |
| C01330 | Q8D8Y2 |
| C01330 | Q8DAG9 |
| C01330 | Q8DY58 |
| C01330 | Q8E3S4 |
| C01330 | Q8ECL5 |
| C01330 | Q8ED79 |
| C01330 | Q8EH93 |
| C01330 | Q8G2C7 |

|        |        |
|--------|--------|
| C01330 | Q8G5R2 |
| C01330 | Q8IVB4 |
| C01330 | Q8JZR4 |
| C01330 | Q8JZR6 |
| C01330 | Q8K0E3 |
| C01330 | Q8N130 |
| C01330 | Q8N695 |
| C01330 | Q8NBS3 |
| C01330 | Q8NFF2 |
| C01330 | Q8R4D1 |
| C01330 | Q8R4H8 |
| C01330 | Q8RWU6 |
| C01330 | Q8S396 |
| C01330 | Q8S397 |
| C01330 | Q8VBW1 |
| C01330 | Q8VDB9 |
| C01330 | Q8VDN2 |
| C01330 | Q8VDT1 |
| C01330 | Q8VM88 |
| C01330 | Q8WWX8 |
| C01330 | Q8X5T7 |
| C01330 | Q8XA63 |
| C01330 | Q8Y2K5 |
| C01330 | Q8YFI5 |
| C01330 | Q8Z1R2 |
| C01330 | Q8Z3L4 |
| C01330 | Q8Z684 |
| C01330 | Q8Z9N5 |
| C01330 | Q8ZA28 |
| C01330 | Q8ZJ73 |
| C01330 | Q8ZKF8 |
| C01330 | Q8ZLX1 |
| C01330 | Q8ZP14 |
| C01330 | Q8ZRZ3 |
| C01330 | Q91Y63 |
| C01330 | Q923I7 |
| C01330 | Q92581 |
| C01330 | Q925H0 |
| C01330 | Q925Q3 |
| C01330 | Q92911 |
| C01330 | Q92Y37 |
| C01330 | Q93235 |
| C01330 | Q93YH1 |
| C01330 | Q96EP9 |
| C01330 | Q96FT7 |
| C01330 | Q96N87 |
| C01330 | Q96T83 |
| C01330 | Q98C38 |

|        |        |
|--------|--------|
| C01330 | Q99250 |
| C01330 | Q99271 |
| C01330 | Q99884 |
| C01330 | Q9A1E0 |
| C01330 | Q9AAZ2 |
| C01330 | Q9BY07 |
| C01330 | Q9BZW2 |
| C01330 | Q9C007 |
| C01330 | Q9CKD8 |
| C01330 | Q9CMD9 |
| C01330 | Q9CPJ1 |
| C01330 | Q9CXB2 |
| C01330 | Q9D687 |
| C01330 | Q9DBP0 |
| C01330 | Q9EPR4 |
| C01330 | Q9ER60 |
| C01330 | Q9ES88 |
| C01330 | Q9GZN6 |
| C01330 | Q9GZV3 |
| C01330 | Q9H015 |
| C01330 | Q9H1V8 |
| C01330 | Q9H2J7 |
| C01330 | Q9H9F5 |
| C01330 | Q9HC58 |
| C01330 | Q9I273 |
| C01330 | Q9I2S5 |
| C01330 | Q9JJV9 |
| C01330 | Q9JMA9 |
| C01330 | Q9JXB8 |
| C01330 | Q9KNC9 |
| C01330 | Q9KQU7 |
| C01330 | Q9LJI2 |
| C01330 | Q9LKW9 |
| C01330 | Q9NP91 |
| C01330 | Q9NRA2 |
| C01330 | Q9NSD5 |
| C01330 | Q9NY37 |
| C01330 | Q9NY91 |
| C01330 | Q9P1Z3 |
| C01330 | Q9R0Y1 |
| C01330 | Q9R1N3 |
| C01330 | Q9S1X8 |
| C01330 | Q9S2C8 |
| C01330 | Q9SYG9 |
| C01330 | Q9U6A0 |
| C01330 | Q9UA35 |
| C01330 | Q9UBY0 |
| C01330 | Q9UGH3 |

|        |        |
|--------|--------|
| C01330 | Q9UHC3 |
| C01330 | Q9UHI7 |
| C01330 | Q9UI33 |
| C01330 | Q9UI40 |
| C01330 | Q9UKG4 |
| C01330 | Q9UN76 |
| C01330 | Q9UPR5 |
| C01330 | Q9UQD0 |
| C01330 | Q9V7S5 |
| C01330 | Q9VR07 |
| C01330 | Q9VVT2 |
| C01330 | Q9W4C5 |
| C01330 | Q9WTU3 |
| C01330 | Q9WTW7 |
| C01330 | Q9WU38 |
| C01330 | Q9WU39 |
| C01330 | Q9X929 |
| C01330 | Q9Y289 |
| C01330 | Q9Y2C5 |
| C01330 | Q9Y2E8 |
| C01330 | Q9Y345 |
| C01330 | Q9Y5Y9 |
| C01330 | Q9Y666 |
| C01330 | Q9Y6M7 |
| C01330 | Q9Y6R1 |
| C01330 | Q9Z2J0 |
| C01330 | Q9Z3Q3 |
| C01330 | Q9ZAA6 |
| C01330 | Q9ZAA7 |
| C01330 | Q9ZAA8 |
| C01330 | Q9ZNG6 |
| C01394 | A4HWI7 |
| C01394 | A8WEV1 |
| C01394 | O05176 |
| C01394 | O05177 |
| C01394 | O34718 |
| C01394 | O74849 |
| C01394 | O74969 |
| C01394 | O97467 |
| C01394 | P0AE24 |
| C01394 | P0AGF4 |
| C01394 | P0AGI4 |
| C01394 | P0AGI6 |
| C01394 | P0AGI7 |
| C01394 | P10090 |
| C01394 | P11166 |
| C01394 | P11168 |
| C01394 | P15729 |



|        |        |
|--------|--------|
| C01394 | P25548 |
| C01394 | P32467 |
| C01394 | P32568 |
| C01394 | P33302 |
| C01394 | P37387 |
| C01394 | P37388 |
| C01394 | P39003 |
| C01394 | P39932 |
| C01394 | P40550 |
| C01394 | P41820 |
| C01394 | P42417 |
| C01394 | P43071 |
| C01394 | P45045 |
| C01394 | P45046 |
| C01394 | P49374 |
| C01394 | P51533 |
| C01394 | P78577 |
| C01394 | P78595 |
| C01394 | Q01440 |
| C01394 | Q02785 |
| C01394 | Q0I348 |
| C01394 | Q11180 |
| C01394 | Q400D8 |
| C01394 | Q576H3 |
| C01394 | Q5KYS1 |
| C01394 | Q663Y5 |
| C01394 | Q6DB03 |
| C01394 | Q6LUY1 |
| C01394 | Q6PXP3 |
| C01394 | Q7BEC4 |
| C01394 | Q7CFR2 |
| C01394 | Q83J33 |
| C01394 | Q880Z2 |
| C01394 | Q8FUR8 |
| C01394 | Q8NJ22 |
| C01394 | Q8RXN0 |
| C01394 | Q8VZ80 |
| C01394 | Q8X0Z3 |
| C01394 | Q8XDM1 |
| C01394 | Q8XPK6 |
| C01394 | Q8YDN0 |
| C01394 | Q92339 |
| C01394 | Q96QE2 |
| C01394 | Q9C8K2 |
| C01394 | Q9H221 |
| C01394 | Q9H222 |
| C01394 | Q9M9E1 |
| C01394 | Q9UNQ0 |

|        |        |
|--------|--------|
| C01394 | Q9XIE2 |
| C01401 | P0AAE0 |
| C01401 | P30144 |
| C01401 | P30145 |
| C01413 | A0ECD9 |
| C01413 | O05469 |
| C01413 | O32219 |
| C01413 | P13511 |
| C01413 | P13512 |
| C01413 | P20021 |
| C01413 | P20107 |
| C01413 | P37617 |
| C01413 | P58414 |
| C01413 | Q88CP1 |
| C01413 | Q88RT8 |
| C01413 | Q8TJZ4 |
| C01413 | Q8ZS90 |
| C01413 | Q92T56 |
| C01413 | Q9I147 |
| C01417 | O05347 |
| C01417 | O07334 |
| C01417 | P17583 |
| C01417 | Q7BW13 |
| C01420 | O60931 |
| C01420 | P0AEM9 |
| C01420 | P0AFT2 |
| C01420 | P37774 |
| C01420 | Q9UPY5 |
| C01420 | Q9WTR6 |
| C01432 | P33231 |
| C01432 | P36035 |
| C01432 | P53985 |
| C01432 | P65254 |
| C01432 | P71067 |
| C01432 | Q48769 |
| C01432 | Q8Z2E3 |
| C01432 | Q8ZL63 |
| C01432 | Q9K5Z9 |
| C01451 | P08722 |
| C01451 | P24241 |
| C01452 | P37080 |
| C01452 | P37081 |
| C01452 | P37082 |
| C01452 | P37083 |
| C01455 | O65943 |
| C01485 | P46032 |
| C01485 | Q05085 |
| C01485 | Q43390 |

|        |        |
|--------|--------|
| C01496 | P17127 |
| C01496 | P44714 |
| C01496 | P44715 |
| C01496 | P47308 |
| C01496 | P69812 |
| C01496 | P75039 |
| C01496 | Q8Z591 |
| C01536 | P0AAD4 |
| C01536 | P0AAD5 |
| C01536 | P38085 |
| C01536 | P38967 |
| C01536 | P44727 |
| C01536 | P44747 |
| C01536 | Q04671 |
| C01536 | Q62052 |
| C01551 | Q04895 |
| C01551 | Q93Z75 |
| C01551 | Q9ZPR7 |
| C01558 | A8I268 |
| C01558 | O30510 |
| C01558 | O35956 |
| C01558 | O95342 |
| C01558 | P09131 |
| C01558 | P21129 |
| C01558 | P26435 |
| C01558 | P32369 |
| C01558 | P43505 |
| C01558 | P70172 |
| C01558 | Q12908 |
| C01558 | Q14973 |
| C01558 | Q22NS1 |
| C01558 | Q3KNW5 |
| C01558 | Q3UEZ8 |
| C01558 | Q51006 |
| C01558 | Q51073 |
| C01558 | Q5PT53 |
| C01558 | Q5PT54 |
| C01558 | Q5PT55 |
| C01558 | Q7GB25 |
| C01558 | Q92887 |
| C01558 | Q96EP9 |
| C01558 | Q9C8G9 |
| C01558 | Q9CXB2 |
| C01582 | O05176 |
| C01582 | O05177 |
| C01582 | O25788 |
| C01582 | O34718 |
| C01582 | O74849 |

|        |        |
|--------|--------|
| C01582 | O74969 |
| C01582 | O97467 |
| C01582 | P0AAG8 |
| C01582 | P0AAG9 |
| C01582 | P0AE24 |
| C01582 | P0AEE5 |
| C01582 | P0AEE7 |
| C01582 | P0AEP1 |
| C01582 | P0C105 |
| C01582 | P10870 |
| C01582 | P11166 |
| C01582 | P11168 |
| C01582 | P13181 |
| C01582 | P13866 |
| C01582 | P15685 |
| C01582 | P15686 |
| C01582 | P22732 |
| C01582 | P23200 |
| C01582 | P25548 |
| C01582 | P28288 |
| C01582 | P32568 |
| C01582 | P33302 |
| C01582 | P33897 |
| C01582 | P34230 |
| C01582 | P40550 |
| C01582 | P41820 |
| C01582 | P42417 |
| C01582 | P43071 |
| C01582 | P44883 |
| C01582 | P44884 |
| C01582 | P51533 |
| C01582 | P53048 |
| C01582 | P78577 |
| C01582 | P78595 |
| C01582 | P95908 |
| C01582 | P96169 |
| C01582 | Q01440 |
| C01582 | Q01441 |
| C01582 | Q02785 |
| C01582 | Q06222 |
| C01582 | Q07647 |
| C01582 | Q12300 |
| C01582 | Q50614 |
| C01582 | Q65UW1 |
| C01582 | Q66C83 |
| C01582 | Q7CHQ3 |
| C01582 | Q896Y2 |
| C01582 | Q8REE1 |

|        |        |
|--------|--------|
| C01582 | Q8X0Z3 |
| C01582 | Q8ZQ35 |
| C01582 | Q92339 |
| C01582 | Q94FB9 |
| C01582 | Q96QE2 |
| C01582 | Q9CM08 |
| C01582 | Q9M9E1 |
| C01582 | Q9XIE2 |
| C01602 | A1VZQ3 |
| C01602 | A3ZI83 |
| C01602 | O30506 |
| C01602 | O32204 |
| C01602 | O34315 |
| C01602 | O34406 |
| C01602 | O34852 |
| C01602 | O34900 |
| C01602 | O34931 |
| C01602 | O50181 |
| C01602 | O50182 |
| C01602 | O50183 |
| C01602 | P02910 |
| C01602 | P02915 |
| C01602 | P09551 |
| C01602 | P0A2I7 |
| C01602 | P0A2I9 |
| C01602 | P0AAE7 |
| C01602 | P0AAF1 |
| C01602 | P0AEM9 |
| C01602 | P0AFT2 |
| C01602 | P18275 |
| C01602 | P37774 |
| C01602 | P39456 |
| C01602 | P42199 |
| C01602 | P42200 |
| C01602 | P54535 |
| C01602 | P54536 |
| C01602 | P54537 |
| C01602 | P73544 |
| C01602 | P73721 |
| C01602 | Q0P9X8 |
| C01602 | Q46170 |
| C01602 | Q88NY2 |
| C01602 | Q88NY3 |
| C01602 | Q88NY4 |
| C01602 | Q88NY5 |
| C01602 | Q8YPM7 |
| C01602 | Q8YPM8 |
| C01602 | Q8YPM9 |

|        |        |
|--------|--------|
| C01602 | Q8YSA2 |
| C01602 | Q9BXI2 |
| C01602 | Q9WVD5 |
| C01602 | Q9Y619 |
| C01606 | Q05181 |
| C01609 | P0A2J3 |
| C01609 | P0A2J5 |
| C01609 | P36634 |
| C01609 | P36636 |
| C01609 | P36638 |
| C01610 | P42670 |
| C01610 | Q79VC7 |
| C01661 | P32010 |
| C01661 | P32011 |
| C01672 | P0AAE8 |
| C01672 | P0AAF0 |
| C01682 | P35113 |
| C01682 | P35116 |
| C01682 | P35118 |
| C01682 | P35120 |
| C01697 | P0A436 |
| C01697 | P0A437 |
| C01697 | P37188 |
| C01697 | P69814 |
| C01697 | P69828 |
| C01697 | P69831 |
| C01697 | P69832 |
| C01708 | Q51104 |
| C01733 | O26096 |
| C01733 | P38734 |
| C01733 | P44785 |
| C01733 | P50276 |
| C01733 | P63356 |
| C01733 | Q02DK6 |
| C01733 | Q02ME3 |
| C01733 | Q032A0 |
| C01733 | Q03A07 |
| C01733 | Q03P57 |
| C01733 | Q03Z27 |
| C01733 | Q043Y8 |
| C01733 | Q04B25 |
| C01733 | Q04DA7 |
| C01733 | Q04F14 |
| C01733 | Q0AU85 |
| C01733 | Q0I5E9 |
| C01733 | Q0KDG3 |
| C01733 | Q18C09 |
| C01733 | Q1LQF6 |

|        |        |
|--------|--------|
| C01733 | Q1M8E0 |
| C01733 | Q2K284 |
| C01733 | Q2NRN5 |
| C01733 | Q2RWA3 |
| C01733 | Q3A9G5 |
| C01733 | Q4KBU0 |
| C01733 | Q4KK46 |
| C01733 | Q4KKK8 |
| C01733 | Q579H8 |
| C01733 | Q5FKL2 |
| C01733 | Q5HHK4 |
| C01733 | Q5HIL5 |
| C01733 | Q5HQQ9 |
| C01733 | Q5HRU5 |
| C01733 | Q5KVK2 |
| C01733 | Q5L5Z1 |
| C01733 | Q5M1F6 |
| C01733 | Q5NFU5 |
| C01733 | Q5YRD1 |
| C01733 | Q5ZUG5 |
| C01733 | Q62B84 |
| C01733 | Q62M41 |
| C01733 | Q63NI4 |
| C01733 | Q63S19 |
| C01733 | Q65M34 |
| C01733 | Q65VG9 |
| C01733 | Q667L9 |
| C01733 | Q66CQ3 |
| C01733 | Q67SV5 |
| C01733 | Q6A6X6 |
| C01733 | Q6AE21 |
| C01733 | Q6D1C4 |
| C01733 | Q6D3Q6 |
| C01733 | Q6D5H7 |
| C01733 | Q6F9P2 |
| C01733 | Q6FAN3 |
| C01733 | Q6G2E2 |
| C01733 | Q6HBS0 |
| C01733 | Q6HP89 |
| C01733 | Q6LN52 |
| C01733 | Q6ME20 |
| C01733 | Q6N798 |
| C01733 | Q6N9W0 |
| C01733 | Q6NJ07 |
| C01733 | Q724C0 |
| C01733 | Q74IV9 |
| C01733 | Q7A6M2 |
| C01733 | Q7A7E3 |

|        |        |
|--------|--------|
| C01733 | Q7CHF8 |
| C01733 | Q7M816 |
| C01733 | Q7MN25 |
| C01733 | Q7N8M2 |
| C01733 | Q7VI92 |
| C01733 | Q7VM95 |
| C01733 | Q7VV72 |
| C01733 | Q7W4E1 |
| C01733 | Q7WFU9 |
| C01733 | Q815Y7 |
| C01733 | Q81IN8 |
| C01733 | Q81IZ6 |
| C01733 | Q81VM2 |
| C01733 | Q81XL3 |
| C01733 | Q81ZF5 |
| C01733 | Q823C4 |
| C01733 | Q827Y0 |
| C01733 | Q832Y6 |
| C01733 | Q83MC5 |
| C01733 | Q87AL9 |
| C01733 | Q87RS1 |
| C01733 | Q87UN4 |
| C01733 | Q87UV4 |
| C01733 | Q88RB3 |
| C01733 | Q88RL5 |
| C01733 | Q88UV2 |
| C01733 | Q88WA5 |
| C01733 | Q895C4 |
| C01733 | Q89LP2 |
| C01733 | Q8CQS7 |
| C01733 | Q8CTB2 |
| C01733 | Q8DFC3 |
| C01733 | Q8DY54 |
| C01733 | Q8E3S0 |
| C01733 | Q8ELA5 |
| C01733 | Q8ELQ6 |
| C01733 | Q8ENU2 |
| C01733 | Q8EPK1 |
| C01733 | Q8FRX8 |
| C01733 | Q8G5P8 |
| C01733 | Q8NSN2 |
| C01733 | Q8PGE8 |
| C01733 | Q8RFN2 |
| C01733 | Q8U7G2 |
| C01733 | Q8Y4L8 |
| C01733 | Q8YA75 |
| C01733 | Q8Z8R5 |
| C01733 | Q8Z990 |



|        |        |
|--------|--------|
| C01733 | Q8ZH38 |
| C01733 | Q92EZ6 |
| C01733 | Q93DA2 |
| C01733 | Q97KD5 |
| C01733 | Q9A502 |
| C01733 | Q9HT70 |
| C01733 | Q9I1C8 |
| C01733 | Q9K789 |
| C01733 | Q9L1C3 |
| C01733 | Q9Z8Q8 |
| C01762 | P45562 |
| C01768 | P18895 |
| C01780 | O15118 |
| C01780 | P61916 |
| C01780 | Q12200 |
| C01834 | O66646 |
| C01834 | P45247 |
| C01834 | P57031 |
| C01834 | P57066 |
| C01834 | P61481 |
| C01834 | P61482 |
| C01834 | P74997 |
| C01834 | Q080S4 |
| C01834 | Q0A8P9 |
| C01834 | Q0APW8 |
| C01834 | Q0BSM2 |
| C01834 | Q0C1C3 |
| C01834 | Q0I3C2 |
| C01834 | Q0VQQ0 |
| C01834 | Q1LPJ9 |
| C01834 | Q1MIJ4 |
| C01834 | Q2GE91 |
| C01834 | Q2GHT4 |
| C01834 | Q2K9R2 |
| C01834 | Q2LVM2 |
| C01834 | Q2NU23 |
| C01834 | Q31GF5 |
| C01834 | Q3A558 |
| C01834 | Q3ARY3 |
| C01834 | Q3ATY5 |
| C01834 | Q3B276 |
| C01834 | Q3B2U2 |
| C01834 | Q3IL62 |
| C01834 | Q3J7S3 |
| C01834 | Q3SRG8 |
| C01834 | Q44613 |
| C01834 | Q47C66 |
| C01834 | Q47YG8 |

|        |        |
|--------|--------|
| C01834 | Q492R2 |
| C01834 | Q4KFA2 |
| C01834 | Q57DS9 |
| C01834 | Q5F8K2 |
| C01834 | Q5FUV5 |
| C01834 | Q5HC57 |
| C01834 | Q5LUD0 |
| C01834 | Q5NHP2 |
| C01834 | Q5NZT6 |
| C01834 | Q5PBX2 |
| C01834 | Q5QU46 |
| C01834 | Q5ZT78 |
| C01834 | Q604C1 |
| C01834 | Q62J04 |
| C01834 | Q63SP4 |
| C01834 | Q64Z80 |
| C01834 | Q65TB7 |
| C01834 | Q669P3 |
| C01834 | Q6AMR9 |
| C01834 | Q6D664 |
| C01834 | Q6FZX3 |
| C01834 | Q6G3A6 |
| C01834 | Q6MD10 |
| C01834 | Q6MMY0 |
| C01834 | Q6N5P8 |
| C01834 | Q6N999 |
| C01834 | Q729H7 |
| C01834 | Q73L25 |
| C01834 | Q7MJ01 |
| C01834 | Q7N3A6 |
| C01834 | Q7UPK3 |
| C01834 | Q7UX73 |
| C01834 | Q7VMV4 |
| C01834 | Q7VR29 |
| C01834 | Q7VZ31 |
| C01834 | Q7W8T0 |
| C01834 | Q7WK40 |
| C01834 | Q82VL9 |
| C01834 | Q83CV2 |
| C01834 | Q83RS0 |
| C01834 | Q87EF4 |
| C01834 | Q87R20 |
| C01834 | Q884I3 |
| C01834 | Q88KY4 |
| C01834 | Q89KN0 |
| C01834 | Q8A1M1 |
| C01834 | Q8EEV5 |
| C01834 | Q8F6L8 |

|        |        |
|--------|--------|
| C01834 | Q8PKT0 |
| C01834 | Q8RFV0 |
| C01834 | Q8X8E3 |
| C01834 | Q8Y0C6 |
| C01834 | Q8YGM0 |
| C01834 | Q8ZFR4 |
| C01834 | Q9A6Z7 |
| C01834 | Q9A9P4 |
| C01834 | Q9EYM2 |
| C01834 | Q9HZL7 |
| C01907 | P32010 |
| C01907 | P32011 |
| C01907 | Q01818 |
| C01907 | Q48658 |
| C01912 | P95827 |
| C01912 | Q4VWC6 |
| C01912 | Q4VWC7 |
| C01912 | Q4VWC8 |
| C01912 | Q4VWC9 |
| C01912 | Q4VWD0 |
| C01935 | Q65QT6 |
| C01935 | Q664X5 |
| C01935 | Q7MFC4 |
| C01935 | Q7N986 |
| C01935 | Q7UBD0 |
| C01935 | Q8Z1U0 |
| C01935 | Q8ZAS8 |
| C01937 | P28873 |
| C01937 | P41438 |
| C01937 | P70502 |
| C01946 | P95827 |
| C01946 | Q53716 |
| C01946 | Q53717 |
| C01996 | O17444 |
| C01996 | O76082 |
| C01996 | P34711 |
| C01996 | P97521 |
| C01996 | Q08986 |
| C01996 | Q16572 |
| C02028 | A0KL02 |
| C02028 | A4QAL6 |
| C02028 | O07837 |
| C02028 | O07838 |
| C02028 | O35055 |
| C02028 | P0ABN5 |
| C02028 | P0ABN9 |
| C02028 | P0ABP3 |
| C02028 | P0AGE5 |

|        |        |
|--------|--------|
| C02028 | P20672 |
| C02028 | P22292 |
| C02028 | P32739 |
| C02028 | P33303 |
| C02028 | P37735 |
| C02028 | P39414 |
| C02028 | P45246 |
| C02028 | P50334 |
| C02028 | P50537 |
| C02028 | Q01857 |
| C02028 | Q02UV9 |
| C02028 | Q03MC5 |
| C02028 | Q0WJ82 |
| C02028 | Q13183 |
| C02028 | Q21339 |
| C02028 | Q2FFH9 |
| C02028 | Q2FMC1 |
| C02028 | Q41364 |
| C02028 | Q485F0 |
| C02028 | Q4K9I6 |
| C02028 | Q52000 |
| C02028 | Q5HEK4 |
| C02028 | Q65NC0 |
| C02028 | Q65UC1 |
| C02028 | Q665P2 |
| C02028 | Q6AS08 |
| C02028 | Q6D9G4 |
| C02028 | Q6FB65 |
| C02028 | Q6LG82 |
| C02028 | Q7A4P8 |
| C02028 | Q7MGA3 |
| C02028 | Q7N0A2 |
| C02028 | Q7VLY3 |
| C02028 | Q82ZN5 |
| C02028 | Q83Q34 |
| C02028 | Q87FP8 |
| C02028 | Q88K49 |
| C02028 | Q8DY58 |
| C02028 | Q8E3S4 |
| C02028 | Q8ECL5 |
| C02028 | Q8Z3L4 |
| C02028 | Q8ZLX1 |
| C02028 | Q91Y63 |
| C02028 | Q9A1E0 |
| C02028 | Q9CMD9 |
| C02028 | Q9ES88 |
| C02028 | Q9I273 |
| C02028 | Q9JXB8 |

|        |        |
|--------|--------|
| C02028 | Q9KNC9 |
| C02028 | Q9QZD8 |
| C02028 | Q9UBX3 |
| C02028 | Q9VVT2 |
| C02057 | P0A187 |
| C02057 | P24207 |
| C02057 | P39137 |
| C02057 | P76037 |
| C02057 | Q46065 |
| C02057 | Q47689 |
| C02336 | P17127 |
| C02336 | P20966 |
| C02336 | P22732 |
| C02336 | P26379 |
| C02336 | P26380 |
| C02336 | P26381 |
| C02336 | P26382 |
| C02336 | P32670 |
| C02336 | P32672 |
| C02336 | P32676 |
| C02336 | P44714 |
| C02336 | P44715 |
| C02336 | P47308 |
| C02336 | P69797 |
| C02336 | P69801 |
| C02336 | P69805 |
| C02336 | P69808 |
| C02336 | P69811 |
| C02336 | P69812 |
| C02336 | P69816 |
| C02336 | P75039 |
| C02336 | P77439 |
| C02336 | P77579 |
| C02336 | Q01441 |
| C02336 | Q8Z591 |
| C02385 | A1VZQ3 |
| C02385 | A3ZI83 |
| C02385 | B5XUC1 |
| C02385 | O30506 |
| C02385 | O32204 |
| C02385 | O34315 |
| C02385 | O34406 |
| C02385 | O34852 |
| C02385 | O34900 |
| C02385 | O34931 |
| C02385 | O50181 |
| C02385 | O50182 |
| C02385 | O50183 |

|        |        |
|--------|--------|
| C02385 | O84379 |
| C02385 | O84385 |
| C02385 | O88750 |
| C02385 | P02910 |
| C02385 | P02915 |
| C02385 | P04817 |
| C02385 | P09551 |
| C02385 | P0A2I7 |
| C02385 | P0A2I9 |
| C02385 | P0AAE7 |
| C02385 | P0AAF6 |
| C02385 | P0AAF8 |
| C02385 | P0AAF9 |
| C02385 | P0AE30 |
| C02385 | P0AE32 |
| C02385 | P0AE33 |
| C02385 | P0AE34 |
| C02385 | P0AE36 |
| C02385 | P0AEM9 |
| C02385 | P0AFT2 |
| C02385 | P18275 |
| C02385 | P30859 |
| C02385 | P30860 |
| C02385 | P37774 |
| C02385 | P39456 |
| C02385 | P42199 |
| C02385 | P42200 |
| C02385 | P45089 |
| C02385 | P45090 |
| C02385 | P45091 |
| C02385 | P45092 |
| C02385 | P54535 |
| C02385 | P54536 |
| C02385 | P54537 |
| C02385 | P73544 |
| C02385 | P73721 |
| C02385 | Q0P9X8 |
| C02385 | Q46170 |
| C02385 | Q5L5E6 |
| C02385 | Q822F2 |
| C02385 | Q88NY2 |
| C02385 | Q88NY3 |
| C02385 | Q88NY4 |
| C02385 | Q88NY5 |
| C02385 | Q8YPM7 |
| C02385 | Q8YPM8 |
| C02385 | Q8YPM9 |
| C02385 | Q8YSA2 |

|        |        |
|--------|--------|
| C02385 | Q8ZGS9 |
| C02385 | Q9PK20 |
| C02385 | Q9Z6M8 |
| C02480 | P94131 |
| C02538 | O15118 |
| C02538 | P61916 |
| C02926 | P0AG34 |
| C02926 | P0AG36 |
| C02926 | P0AG37 |
| C02926 | Q8Z3B4 |
| C03033 | A8I268 |
| C03033 | P0CE45 |
| C03033 | Q7GB25 |
| C03033 | Q92887 |
| C03033 | Q9C8G9 |
| C03474 | O52557 |
| C03474 | P13090 |
| C03474 | P23054 |
| C03474 | P32369 |
| C03474 | P37594 |
| C03474 | P39886 |
| C03474 | P42670 |
| C03474 | P76269 |
| C03474 | Q00538 |
| C03474 | Q9KIH3 |
| C03474 | Q9L1B4 |
| C03479 | P41438 |
| C03557 | Q8Z8W7 |
| C03557 | Q8Z8W8 |
| C03557 | Q8Z8W9 |
| C03557 | Q8Z8X0 |
| C03664 | Q46M63 |
| C03758 | A2RUN4 |
| C03758 | Q01959 |
| C03758 | Q02563 |
| C03758 | Q61327 |
| C03758 | Q79VE0 |
| C04137 | P0A2V2 |
| C04137 | P0A4F8 |
| C04137 | P0A4N5 |
| C04137 | P35113 |
| C04137 | P35114 |
| C04137 | P35116 |
| C04137 | P35118 |
| C04137 | P35120 |
| C05005 | O50295 |
| C05005 | O50296 |
| C05005 | Q7A2B0 |

|        |        |
|--------|--------|
| C05005 | Q8YT39 |
| C05079 | O51918 |
| C05079 | O51919 |
| C05079 | O69070 |
| C05079 | P0AEJ0 |
| C05079 | P25594 |
| C05079 | P36554 |
| C05079 | Q5PU79 |
| C05079 | Q7A5M0 |
| C05079 | Q939A4 |
| C05079 | Q93AT6 |
| C05079 | Q9HS33 |
| C05079 | Q9RQ29 |
| C05113 | P06129 |
| C05122 | O88397 |
| C05122 | Q00910 |
| C05122 | Q9JHI3 |
| C05227 | Q95YI5 |
| C05402 | A0L4K8 |
| C05402 | A0L4L0 |
| C05402 | A4YGY2 |
| C05402 | A7ZUZ0 |
| C05402 | A8M8Z1 |
| C05402 | A8TDW7 |
| C05402 | A8TDX0 |
| C05402 | A9QDR6 |
| C05402 | A9QDR7 |
| C05402 | A9QDR8 |
| C05402 | O06989 |
| C05402 | O06990 |
| C05402 | O06991 |
| C05402 | O07009 |
| C05402 | O07011 |
| C05402 | O07330 |
| C05402 | O30489 |
| C05402 | O31710 |
| C05402 | O31711 |
| C05402 | O31712 |
| C05402 | O32261 |
| C05402 | P0A3G5 |
| C05402 | P30878 |
| C05402 | P36497 |
| C05402 | P50332 |
| C05402 | P50333 |
| C05402 | P68579 |
| C05402 | P75830 |
| C05402 | P75831 |
| C05402 | P94360 |



|        |        |
|--------|--------|
| C05402 | P96483 |
| C05402 | P96517 |
| C05402 | Q00564 |
| C05402 | Q00749 |
| C05402 | Q00750 |
| C05402 | Q00751 |
| C05402 | Q00752 |
| C05402 | Q03727 |
| C05402 | Q2SDB0 |
| C05402 | Q2SDB1 |
| C05402 | Q52899 |
| C05402 | Q52900 |
| C05402 | Q72H66 |
| C05402 | Q72H67 |
| C05402 | Q72H68 |
| C05402 | Q72KX2 |
| C05402 | Q72KX3 |
| C05402 | Q72KX4 |
| C05402 | Q72L52 |
| C05402 | Q73MJ2 |
| C05402 | Q73MJ3 |
| C05402 | Q73MJ4 |
| C05402 | Q7A3X3 |
| C05402 | Q7A7X2 |
| C05402 | Q7AUQ4 |
| C05402 | Q7WWQ6 |
| C05402 | Q7WWQ8 |
| C05402 | Q7WWQ9 |
| C05402 | Q7WWR0 |
| C05402 | Q8DNB9 |
| C05402 | Q8DNC0 |
| C05402 | Q8DT25 |
| C05402 | Q8DT26 |
| C05402 | Q8DT27 |
| C05402 | Q8DT28 |
| C05402 | Q8RKC0 |
| C05402 | Q8RKC1 |
| C05402 | Q8TM30 |
| C05402 | Q8TM31 |
| C05402 | Q93LN0 |
| C05402 | Q93LN1 |
| C05402 | Q973J4 |
| C05402 | Q9L026 |
| C05402 | Q9L027 |
| C05402 | Q9S3J9 |
| C05402 | Q9S5Y1 |
| C05402 | Q9X0S9 |
| C05402 | Q9X0T0 |

|        |        |
|--------|--------|
| C05402 | Q9X0T1 |
| C05402 | Q9X103 |
| C05402 | Q9X2F5 |
| C05402 | Q9X9R5 |
| C05402 | Q9X9R6 |
| C05402 | Q9X9R7 |
| C05629 | P44629 |
| C05776 | A6TAH6 |
| C05776 | P06609 |
| C05776 | P06611 |
| C05776 | P63351 |
| C05776 | P63352 |
| C05776 | Q669Z9 |
| C05776 | Q66A01 |
| C05776 | Q66EE7 |
| C05776 | Q6D1Z3 |
| C05776 | Q6D654 |
| C05776 | Q6D656 |
| C05776 | Q6LQ77 |
| C05776 | Q6LUR6 |
| C05776 | Q7C1M3 |
| C05776 | Q7C1M5 |
| C05776 | Q7MLE6 |
| C05776 | Q7MLE7 |
| C05776 | Q7MNT2 |
| C05776 | Q7N3Q3 |
| C05776 | Q7N3Q4 |
| C05776 | Q7N842 |
| C05776 | Q83MD7 |
| C05776 | Q87Q38 |
| C05776 | Q87Q39 |
| C05776 | Q87SE7 |
| C05776 | Q8D928 |
| C05776 | Q8X4L7 |
| C05776 | Q8X5W0 |
| C05776 | Q8X8Z0 |
| C05776 | Q8Z6I5 |
| C05776 | Q8Z9B2 |
| C05776 | Q8ZBM3 |
| C05776 | Q8ZDX4 |
| C05776 | Q8ZDX6 |
| C05776 | Q8ZPS8 |
| C05776 | Q8ZRP7 |
| C05776 | Q9KSL1 |
| C05776 | Q9KSL2 |
| C05821 | Q08299 |
| C06186 | P08722 |
| C06186 | P24241 |

|        |        |
|--------|--------|
| C06228 | P06971 |
| C06228 | P38731 |
| C06230 | Q08299 |
| C06231 | O32243 |
| C06231 | O34742 |
| C06231 | O34878 |
| C06231 | O34992 |
| C06232 | O30142 |
| C06232 | O30143 |
| C06232 | O30144 |
| C06232 | P09833 |
| C06232 | P0AF01 |
| C06232 | P37329 |
| C06232 | Q0BQ80 |
| C06232 | Q0VQ44 |
| C06232 | Q1MA70 |
| C06232 | Q2K2X0 |
| C06232 | Q2RWI9 |
| C06232 | Q47CB7 |
| C06232 | Q579Z3 |
| C06232 | Q88G95 |
| C06232 | Q8U4K3 |
| C06232 | Q8U4K4 |
| C06232 | Q8U4K5 |
| C06232 | Q8UCD5 |
| C06232 | Q8ZGX6 |
| C06232 | Q9V2C0 |
| C06232 | Q9V2C1 |
| C06232 | Q9V2C4 |
| C06268 | O32243 |
| C06268 | O34742 |
| C06268 | O34878 |
| C06268 | O34992 |
| C06268 | P0AFM2 |
| C06268 | P14175 |
| C06268 | P14176 |
| C06268 | P31661 |
| C06268 | Q87WH3 |
| C06268 | Q87WH4 |
| C06268 | Q87WH5 |
| C06268 | Q8Q040 |
| C06268 | Q8Q041 |
| C06268 | Q8Q042 |
| C06268 | Q8Q043 |
| C06268 | Q9HTH6 |
| C06268 | Q9HTI6 |
| C06268 | Q9HTI7 |
| C06268 | Q9HTI8 |

|        |        |
|--------|--------|
| C06313 | O76729 |
| C06313 | Q07492 |
| C06313 | Q25272 |
| C06313 | Q9UAC2 |
| C06413 | P0A0J7 |
| C06570 | B2YGG2 |
| C06570 | O31137 |
| C06570 | P02982 |
| C06570 | P02983 |
| C06570 | P38125 |
| C06570 | P38227 |
| C06570 | P70187 |
| C06570 | Q14728 |
| C06570 | Q2FZP8 |
| C06570 | Q5SR56 |
| C06570 | Q79VC7 |
| C06570 | Q8CIA9 |
| C06570 | Q96MC6 |
| C06570 | Q9KMQ3 |
| C06574 | P0AE16 |
| C06685 | P0ADL1 |
| C06685 | P25744 |
| C06685 | P28873 |
| C06685 | P31462 |
| C06685 | P32071 |
| C06685 | P69367 |
| C06685 | Q05940 |
| C06685 | Q16572 |
| C06685 | Q70WR7 |
| C06685 | Q797E3 |
| C06685 | Q7VW14 |
| C06685 | Q8NRB5 |
| C06687 | B7ZGM0 |
| C06687 | O82855 |
| C06687 | Q2G140 |
| C06687 | Q3V050 |
| C06687 | Q5I0E9 |
| C06687 | Q86VL8 |
| C06687 | Q8K0H1 |
| C06687 | Q945F0 |
| C06687 | Q96FL8 |
| C06687 | Q9I3Y3 |
| C06687 | Q9JV27 |
| C06691 | Q53902 |
| C06691 | Q53903 |
| C06696 | P37617 |
| C06697 | O43681 |
| C06697 | P08690 |

|        |        |
|--------|--------|
| C06697 | P0AB93 |
| C06697 | P0AB94 |
| C06697 | P0AB95 |
| C06697 | P30329 |
| C06697 | P46838 |
| C06697 | P63620 |
| C06697 | Q06598 |
| C06697 | Q54GU0 |
| C06697 | Q5HF02 |
| C06697 | Q5HRI3 |
| C06697 | Q8CQF4 |
| C06701 | A0QQ68 |
| C06701 | A0QQ70 |
| C06701 | A0QQ71 |
| C06701 | P16677 |
| C06701 | P16682 |
| C06701 | P16683 |
| C06701 | Q02QE8 |
| C06701 | Q02QM1 |
| C06701 | Q032D0 |
| C06701 | Q035E0 |
| C06701 | Q04CG8 |
| C06701 | Q0ASQ1 |
| C06701 | Q0BZD8 |
| C06701 | Q1LJ08 |
| C06701 | Q1LQB5 |
| C06701 | Q1MMZ3 |
| C06701 | Q2KDV1 |
| C06701 | Q2SR40 |
| C06701 | Q31DV4 |
| C06701 | Q3IM24 |
| C06701 | Q3ISC1 |
| C06701 | Q47F10 |
| C06701 | Q5HJM6 |
| C06701 | Q5HKQ8 |
| C06701 | Q5LVC2 |
| C06701 | Q5UW69 |
| C06701 | Q5V6B8 |
| C06701 | Q5YTW4 |
| C06701 | Q62H59 |
| C06701 | Q63R24 |
| C06701 | Q66D26 |
| C06701 | Q6F0P3 |
| C06701 | Q6HFB5 |
| C06701 | Q6MUF4 |
| C06701 | Q6NA00 |
| C06701 | Q72AQ6 |
| C06701 | Q73P71 |

|        |         |
|--------|---------|
| C06701 | Q74LQ3  |
| C06701 | Q7A848  |
| C06701 | Q7M8M4  |
| C06701 | Q7W148  |
| C06701 | Q7WNT8  |
| C06701 | Q81A96  |
| C06701 | Q81Y10  |
| C06701 | Q83P97  |
| C06701 | Q882S0  |
| C06701 | Q889G0  |
| C06701 | Q88PM5  |
| C06701 | Q88YN5  |
| C06701 | Q89C51  |
| C06701 | Q8CMU4  |
| C06701 | Q8CUIY0 |
| C06701 | Q8NQH4  |
| C06701 | Q8REG7  |
| C06701 | Q8UIW7  |
| C06701 | Q8XDV7  |
| C06701 | Q8YK28  |
| C06701 | Q8YUI9  |
| C06701 | Q8YUV1  |
| C06701 | Q8ZGU5  |
| C06701 | Q92V71  |
| C06701 | Q98GF5  |
| C06701 | Q9AB70  |
| C06701 | Q9HNI8  |
| C06701 | Q9HYL7  |
| C06701 | Q9HYT0  |
| C06701 | Q9K8N1  |
| C06701 | Q9KFL0  |
| C06701 | Q9KFN9  |
| C06702 | P0AFK4  |
| C06702 | P0AFK6  |
| C06702 | P0AFK9  |
| C06702 | P0AFM2  |
| C06702 | P14175  |
| C06702 | P14176  |
| C06702 | P69874  |
| C06702 | Q07824  |
| C06702 | Q87WH3  |
| C06702 | Q87WH4  |
| C06702 | Q87WH5  |
| C06702 | Q8Q040  |
| C06702 | Q8Q041  |
| C06702 | Q8Q042  |
| C06702 | Q8Q043  |
| C06702 | Q9HTH6  |

|        |        |
|--------|--------|
| C06702 | Q9HTI6 |
| C06702 | Q9HTI7 |
| C06702 | Q9HTI8 |
| C06703 | O32243 |
| C06703 | O34742 |
| C06703 | O34878 |
| C06703 | O34992 |
| C06703 | P0AFM2 |
| C06703 | P14175 |
| C06703 | P14176 |
| C06703 | P39775 |
| C06703 | P46920 |
| C06703 | P46921 |
| C06703 | P46922 |
| C06703 | Q45153 |
| C06703 | Q45460 |
| C06703 | Q45461 |
| C06703 | Q45462 |
| C06703 | Q87WH3 |
| C06703 | Q87WH4 |
| C06703 | Q87WH5 |
| C06703 | Q8Q040 |
| C06703 | Q8Q041 |
| C06703 | Q8Q042 |
| C06703 | Q8Q043 |
| C06703 | Q9HTH6 |
| C06703 | Q9HTI6 |
| C06703 | Q9HTI7 |
| C06703 | Q9HTI8 |
| C06703 | Q9RQ05 |
| C06703 | Q9RQ06 |
| C06705 | P24584 |
| C06705 | P24586 |
| C06707 | P42953 |
| C06707 | P42954 |
| C06707 | Q5HR97 |
| C06707 | Q65E84 |
| C06707 | Q720Z5 |
| C06707 | Q7A713 |
| C06707 | Q81K31 |
| C06707 | Q831L8 |
| C06707 | Q88ZH4 |
| C06707 | Q8CTM4 |
| C06707 | Q8Y843 |
| C06707 | Q92CV8 |
| C06707 | Q9CH26 |
| C06708 | Q5RLM2 |
| C06708 | Q63089 |

|        |        |
|--------|--------|
| C06708 | Q80UJ1 |
| C06708 | Q86VW1 |
| C06708 | Q8CFZ5 |
| C06708 | Q8IVM8 |
| C06708 | Q96S37 |
| C06708 | Q9CAT6 |
| C06708 | Q9NSA0 |
| C06708 | Q9R0W2 |
| C06708 | Q9Y226 |
| C06710 | Q9ZHC9 |
| C06767 | O68877 |
| C06767 | P31499 |
| C06767 | Q02FW7 |
| C06767 | Q1LC89 |
| C06767 | Q1MCZ1 |
| C06767 | Q2K551 |
| C06767 | Q2NSR0 |
| C06767 | Q31J97 |
| C06767 | Q3ICT8 |
| C06767 | Q3SQ65 |
| C06767 | Q4K5Z7 |
| C06767 | Q56991 |
| C06767 | Q56992 |
| C06767 | Q56993 |
| C06767 | Q5QXD0 |
| C06767 | Q5YVL8 |
| C06767 | Q62A98 |
| C06767 | Q63NR0 |
| C06767 | Q66FK0 |
| C06767 | Q6D645 |
| C06767 | Q6G098 |
| C06767 | Q6G475 |
| C06767 | Q6LQC0 |
| C06767 | Q6N7Y6 |
| C06767 | Q7MFA1 |
| C06767 | Q7N3S7 |
| C06767 | Q7NN36 |
| C06767 | Q7W025 |
| C06767 | Q7W359 |
| C06767 | Q7WEH6 |
| C06767 | Q87J32 |
| C06767 | Q88DY1 |
| C06767 | Q8EB59 |
| C06767 | Q8UCM5 |
| C06767 | Q8X5N2 |
| C06767 | Q92N13 |
| C06767 | Q93SH7 |
| C06767 | Q98L75 |



|        |        |
|--------|--------|
| C06767 | Q9KL34 |
| C06767 | Q9RKQ4 |
| C06812 | P46104 |
| C06812 | P95827 |
| C06812 | Q8Y9K8 |
| C06821 | P0A0J7 |
| C06821 | P0AEY8 |
| C06821 | P23910 |
| C06821 | P31122 |
| C06821 | P33532 |
| C06821 | P34711 |
| C06821 | P38124 |
| C06821 | P54219 |
| C06821 | Q01818 |
| C06821 | Q07824 |
| C06821 | Q9S3J9 |
| C06956 | P46720 |
| C06956 | P46721 |
| C06956 | Q6ZQN7 |
| C06956 | Q8UVG4 |
| C06956 | Q9EPZ7 |
| C06956 | Q9NPD5 |
| C07597 | P39980 |
| C08215 | O88397 |
| C08215 | Q9JHI3 |
| C08353 | A6VKS8 |
| C08353 | A6VKS9 |
| C08353 | A6VKT0 |
| C08353 | A8H4W5 |
| C08353 | A8H4W6 |
| C08353 | A8H4W7 |
| C08353 | O80725 |
| C08353 | O83340 |
| C08353 | O83341 |
| C08353 | O83342 |
| C08353 | O83343 |
| C08353 | O94911 |
| C08353 | O95342 |
| C08353 | P02925 |
| C08353 | P04983 |
| C08353 | P08183 |
| C08353 | P0AGI1 |
| C08353 | P0AGI3 |
| C08353 | P13568 |
| C08353 | P21439 |
| C08353 | P25714 |
| C08353 | P29724 |
| C08353 | P34358 |

|        |        |
|--------|--------|
| C08353 | P41233 |
| C08353 | P44735 |
| C08353 | P44736 |
| C08353 | P60949 |
| C08353 | P78363 |
| C08353 | Q02XM9 |
| C08353 | Q03CA4 |
| C08353 | Q0HIQ5 |
| C08353 | Q0HIQ6 |
| C08353 | Q0HIQ7 |
| C08353 | Q0HIQ8 |
| C08353 | Q0WML0 |
| C08353 | Q1M360 |
| C08353 | Q1M4Q7 |
| C08353 | Q1M4Q8 |
| C08353 | Q1M4Q9 |
| C08353 | Q1M5X4 |
| C08353 | Q1MHS1 |
| C08353 | Q2K0S7 |
| C08353 | Q2K204 |
| C08353 | Q2K9A3 |
| C08353 | Q5HJA6 |
| C08353 | Q5KUX3 |
| C08353 | Q62K91 |
| C08353 | Q63P06 |
| C08353 | Q65E55 |
| C08353 | Q6DB87 |
| C08353 | Q6HNE7 |
| C08353 | Q6LH11 |
| C08353 | Q7CG00 |
| C08353 | Q7MEV1 |
| C08353 | Q7NA79 |
| C08353 | Q7UU57 |
| C08353 | Q81HW8 |
| C08353 | Q81V36 |
| C08353 | Q825P1 |
| C08353 | Q82CM5 |
| C08353 | Q82ZT8 |
| C08353 | Q87H79 |
| C08353 | Q88J90 |
| C08353 | Q891M1 |
| C08353 | Q8DU36 |
| C08353 | Q8DU37 |
| C08353 | Q8DU38 |
| C08353 | Q8E281 |
| C08353 | Q8E7N9 |
| C08353 | Q8ENB3 |
| C08353 | Q8NR12 |

|        |        |
|--------|--------|
| C08353 | Q8RD43 |
| C08353 | Q8T5Z7 |
| C08353 | Q8U949 |
| C08353 | Q8UA86 |
| C08353 | Q8X5Q4 |
| C08353 | Q8XAW7 |
| C08353 | Q8XJX3 |
| C08353 | Q8Z2R4 |
| C08353 | Q8ZKV9 |
| C08353 | Q90Z35 |
| C08353 | Q92UI2 |
| C08353 | Q92W60 |
| C08353 | Q92WK1 |
| C08353 | Q92WK2 |
| C08353 | Q92WK4 |
| C08353 | Q987E7 |
| C08353 | Q98K15 |
| C08353 | Q99758 |
| C08353 | Q9BZC7 |
| C08353 | Q9CL63 |
| C08353 | Q9CP98 |
| C08353 | Q9K6J9 |
| C08353 | Q9KN37 |
| C08353 | Q9LJX0 |
| C08353 | Q9RDI1 |
| C08353 | Q9WXX0 |
| C08353 | Q9X051 |
| C08353 | Q9ZR72 |
| C10896 | P28873 |
| C11161 | A5H8A5 |
| C11161 | B7ZGM0 |
| C11161 | D1QCY9 |
| C11161 | O32182 |
| C11161 | O35018 |
| C11161 | O82855 |
| C11161 | P39843 |
| C11161 | P71678 |
| C11161 | Q01818 |
| C11161 | Q2G140 |
| C11161 | Q3V050 |
| C11161 | Q48658 |
| C11161 | Q50392 |
| C11161 | Q5I0E9 |
| C11161 | Q86VL8 |
| C11161 | Q8K0H1 |
| C11161 | Q945F0 |
| C11161 | Q96FL8 |
| C11161 | Q9I3Y3 |

|        |        |
|--------|--------|
| C11161 | Q9JV27 |
| C11161 | Q9ZGB6 |
| C11227 | P38206 |
| C11259 | P28246 |
| C11261 | O52557 |
| C11261 | P13090 |
| C11261 | P23054 |
| C11261 | P32369 |
| C11261 | P37594 |
| C11261 | P39886 |
| C11261 | P42670 |
| C11261 | P76269 |
| C11261 | Q00538 |
| C11261 | Q9KIH3 |
| C11261 | Q9L1B4 |
| C11476 | P0AAF5 |
| C11476 | P0AE27 |
| C11476 | Q62GY9 |
| C11476 | Q63QQ7 |
| C11476 | Q65WJ1 |
| C11476 | Q6D4W8 |
| C11476 | Q83KP2 |
| C11476 | Q87FK7 |
| C11476 | Q882I8 |
| C11476 | Q8XVS2 |
| C11476 | Q9KEE7 |
| C11476 | Q9KEE9 |
| C11476 | Q9KEF0 |
| C11477 | O04036 |
| C11477 | O25797 |
| C11477 | O95528 |
| C11477 | P31436 |
| C11477 | P31675 |
| C11477 | P33026 |
| C11477 | P33027 |
| C11477 | P39932 |
| C11477 | P44535 |
| C11477 | P58529 |
| C11477 | P58530 |
| C11477 | P58531 |
| C11477 | Q02SS7 |
| C11477 | Q39228 |
| C11477 | Q4F7G0 |
| C11477 | Q65S74 |
| C11477 | Q6CZ44 |
| C11477 | Q7UCG7 |
| C11477 | Q888L8 |
| C11477 | Q88K63 |

|        |        |
|--------|--------|
| C11477 | Q8BIV7 |
| C11477 | Q8LPQ8 |
| C11477 | Q8VZ80 |
| C11477 | Q8VZT3 |
| C11477 | Q921R7 |
| C11477 | Q94CI6 |
| C11477 | Q94CI7 |
| C11477 | Q94KE0 |
| C11477 | Q96290 |
| C11477 | Q9D321 |
| C11477 | Q9HWR7 |
| C11477 | Q9LT15 |
| C11477 | Q9S3K0 |
| C11477 | Q9SCW7 |
| C11477 | Q9SD00 |
| C11477 | Q9SFG0 |
| C11477 | Q9Y2W3 |
| C12044 | O52557 |
| C12044 | Q54806 |
| C12268 | P33951 |
| C14701 | Q07824 |
| C14818 | O25396 |
| C14818 | P28795 |
| C14818 | P40988 |
| C14818 | Q07418 |
| C14818 | Q38856 |
| C14818 | Q5KG96 |
| C14818 | Q5ZS62 |
| C14818 | Q7A3F2 |
| C14818 | Q83PW3 |
| C14818 | Q8F332 |
| C14818 | Q8XED4 |
| C14819 | O54368 |
| C14819 | O54369 |
| C14819 | O54370 |
| C14819 | O54371 |
| C14819 | O54372 |
| C14819 | P0A4G4 |
| C14819 | P21408 |
| C14819 | P21409 |
| C14819 | P21410 |
| C14819 | P33650 |
| C14819 | P38993 |
| C14819 | P40088 |
| C14819 | P44531 |
| C14819 | Q56952 |
| C14819 | Q56953 |
| C14819 | Q56954 |

|        |        |
|--------|--------|
| C14819 | Q56955 |
| C14819 | Q57341 |
| C14819 | Q9RNI8 |
| C14819 | Q9RNI9 |
| C14819 | Q9Z4R9 |
| C15025 | O32243 |
| C15025 | O34742 |
| C15025 | O34878 |
| C15025 | O34992 |
| C15025 | P0AFM2 |
| C15025 | P14175 |
| C15025 | P14176 |
| C15025 | Q87WH3 |
| C15025 | Q87WH4 |
| C15025 | Q87WH5 |
| C15025 | Q8Q040 |
| C15025 | Q8Q041 |
| C15025 | Q8Q042 |
| C15025 | Q8Q043 |
| C15025 | Q9HTH6 |
| C15025 | Q9HTI6 |
| C15025 | Q9HTI7 |
| C15025 | Q9HTI8 |
| C15587 | P17064 |
| C15587 | P48777 |
| C15587 | P50487 |
| C15587 | Q12119 |
| C15587 | Q84MA8 |
| C15587 | Q9SRK7 |
| C15643 | O15118 |
| C15643 | P61916 |
| C15643 | Q12200 |
| C15773 | Q79VC7 |
| C16433 | O35544 |
| C16433 | O75746 |
| C16433 | P0AAG3 |
| C16433 | P0AAG4 |
| C16433 | P0ABN5 |
| C16433 | P0AER3 |
| C16433 | P0AER5 |
| C16433 | P0AER7 |
| C16433 | P21345 |
| C16433 | P24942 |
| C16433 | P24943 |
| C16433 | P37902 |
| C16433 | P43004 |
| C16433 | P43006 |
| C16433 | P48664 |

|        |        |
|--------|--------|
| C16433 | P51906 |
| C16433 | Q52663 |
| C16433 | Q52664 |
| C16433 | Q52665 |
| C16433 | Q52666 |
| C16433 | Q8BH59 |
| C16433 | Q91WN3 |
| C16433 | Q9QXX4 |
| C16434 | P04816 |
| C16434 | P0A9S7 |
| C16434 | P0AD96 |
| C16434 | P0AEX7 |
| C16434 | P19072 |
| C16434 | P22729 |
| C16434 | P22731 |
| C16434 | P25185 |
| C16434 | P38084 |
| C16434 | P41815 |
| C16434 | P54104 |
| C16435 | P07117 |
| C16435 | P0AFM2 |
| C16435 | P0C0L7 |
| C16435 | P0C0L8 |
| C16435 | P10502 |
| C16435 | P14175 |
| C16435 | P14176 |
| C16435 | P15380 |
| C16435 | P28573 |
| C16435 | P37460 |
| C16435 | P40862 |
| C16435 | P45174 |
| C16435 | P92961 |
| C16435 | Q5HEM0 |
| C16435 | Q5HIA2 |
| C16435 | Q5HN32 |
| C16435 | Q5HRH0 |
| C16435 | Q6PGE7 |
| C16435 | Q79VE0 |
| C16435 | Q7A4Q7 |
| C16435 | Q7A771 |
| C16435 | Q87WH3 |
| C16435 | Q87WH4 |
| C16435 | Q87WH5 |
| C16435 | Q8CNP2 |
| C16435 | Q8Q040 |
| C16435 | Q8Q041 |
| C16435 | Q8Q042 |
| C16435 | Q8Q043 |

|        |        |
|--------|--------|
| C16435 | Q99884 |
| C16435 | Q9HTH6 |
| C16435 | Q9HTI6 |
| C16435 | Q9HTI7 |
| C16435 | Q9HTI8 |
| C16436 | P04816 |
| C16436 | P0A9S7 |
| C16436 | P0AD96 |
| C16436 | P0AEX7 |
| C16436 | P19072 |
| C16436 | P22729 |
| C16436 | P22731 |
| C16436 | P25185 |
| C16436 | P38084 |
| C16436 | P38085 |
| C16436 | P41815 |
| C16436 | P54104 |
| C16438 | P25376 |
| C16438 | P40812 |
| C16438 | P53388 |
| C16438 | Q52663 |
| C16438 | Q52664 |
| C16438 | Q52665 |
| C16438 | Q52666 |
| C16439 | P04816 |
| C16439 | P0A9S7 |
| C16439 | P0AD96 |
| C16439 | P0AD98 |
| C16439 | P0AEX7 |
| C16439 | P17215 |
| C16439 | P19072 |
| C16439 | P22729 |
| C16439 | P22731 |
| C16439 | P25185 |
| C16439 | P38084 |
| C16439 | P54104 |
| C16439 | Q03770 |
| C16440 | A1VZQ3 |
| C16440 | A3ZI83 |
| C16440 | A6TDS8 |
| C16440 | O30506 |
| C16440 | O34315 |
| C16440 | O34406 |
| C16440 | O34852 |
| C16440 | O34900 |
| C16440 | O34931 |
| C16440 | O50181 |
| C16440 | O50182 |



|        |        |
|--------|--------|
| C16440 | O50183 |
| C16440 | P02910 |
| C16440 | P02915 |
| C16440 | P09551 |
| C16440 | P0A2I7 |
| C16440 | P0A2I9 |
| C16440 | P0AAE8 |
| C16440 | P0AAF0 |
| C16440 | P0AEM9 |
| C16440 | P0AFT2 |
| C16440 | P25737 |
| C16440 | P32487 |
| C16440 | P35865 |
| C16440 | P37774 |
| C16440 | P39456 |
| C16440 | P42199 |
| C16440 | P42200 |
| C16440 | P54535 |
| C16440 | P54536 |
| C16440 | P54537 |
| C16440 | P73544 |
| C16440 | P73721 |
| C16440 | P94633 |
| C16440 | Q0P9X8 |
| C16440 | Q666Q4 |
| C16440 | Q6D090 |
| C16440 | Q6NHP1 |
| C16440 | Q7N183 |
| C16440 | Q7UBP8 |
| C16440 | Q88NY2 |
| C16440 | Q88NY3 |
| C16440 | Q88NY4 |
| C16440 | Q88NY5 |
| C16440 | Q8RQM4 |
| C16440 | Q8XD10 |
| C16440 | Q8YPM7 |
| C16440 | Q8YPM8 |
| C16440 | Q8YPM9 |
| C16440 | Q8YSA2 |
| C16440 | Q8Z3W2 |
| C16440 | Q8ZHH6 |
| C16440 | Q8ZM68 |
| C16692 | Q44381 |
| C16692 | Q44382 |
| C16692 | Q44383 |
| C16692 | Q44384 |

---
