# Supplementary material for: METSP: A Maximum-Entropy Classifier Based Text Mining Tool for Transporter-Substrate Identification with Semistructured Text
Source: Biomed Res Int. 2015 Oct 1;2015:254838. doi: 10.1155/2015/254838 (PMC4606149; doi:10.1155/2015/254838)
Supplement: Supplementary file 1 — In Additional file 1, the 6955 TSPs were manually collected from UniProt, TransportDB, and TCDB. In Additional file 2, the training set includes 41,332 instances in the format of “label + accession number + field flag + a sentence.” In Additional file 3, the 3942 human TSPs were extracted by METSP. [file 254838.f1.zip]

Archive with 4 entries (3 files):
- 254838.f1/
- 254838.f1/254838-1.pdf
- 254838.f1/254838-2.pdf
- 254838.f1/254838-3.pdf
